# Supplementary material
Source: PubMed Central journal article supplement (PMC4721512)
Supplement: NIHMS725823-supplement-1.pdf [file NIHMS725823-supplement-1.pdf]

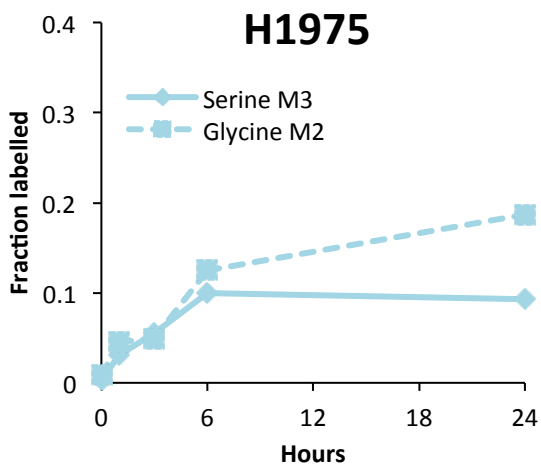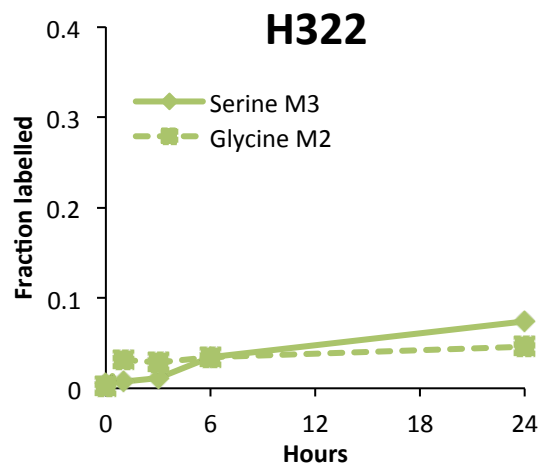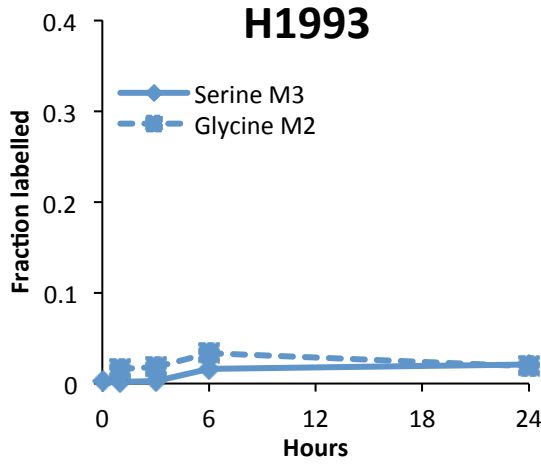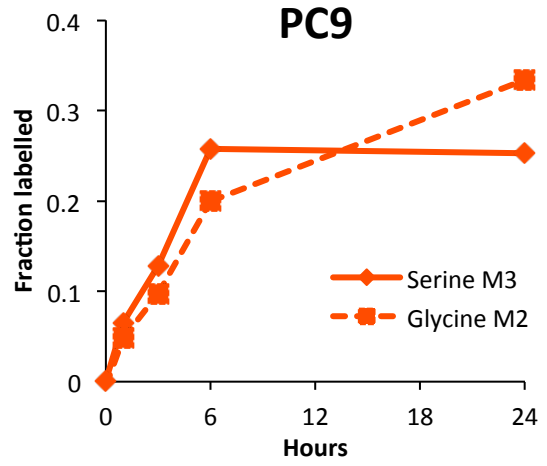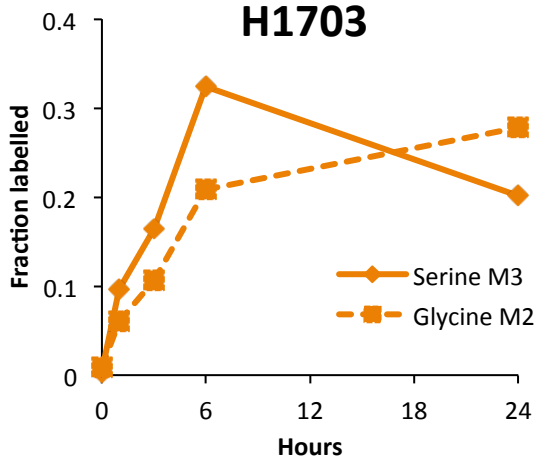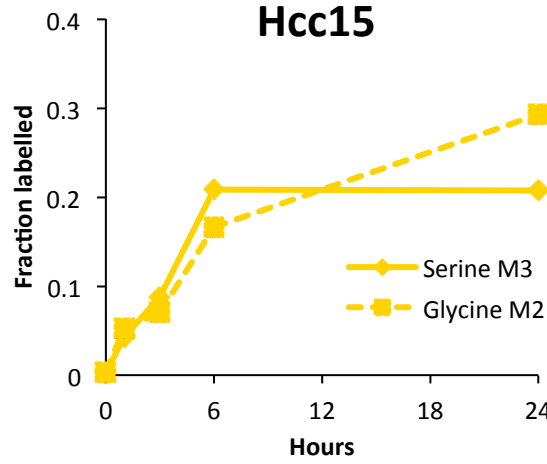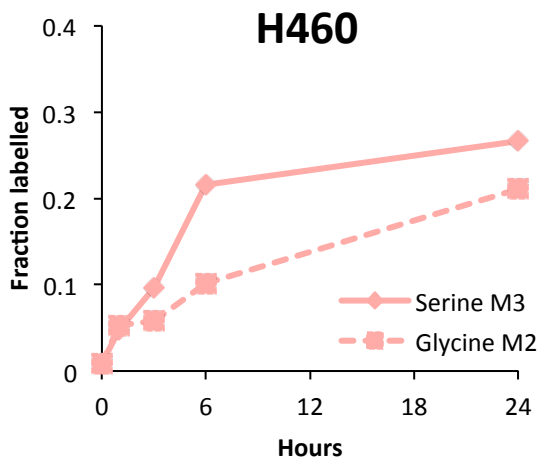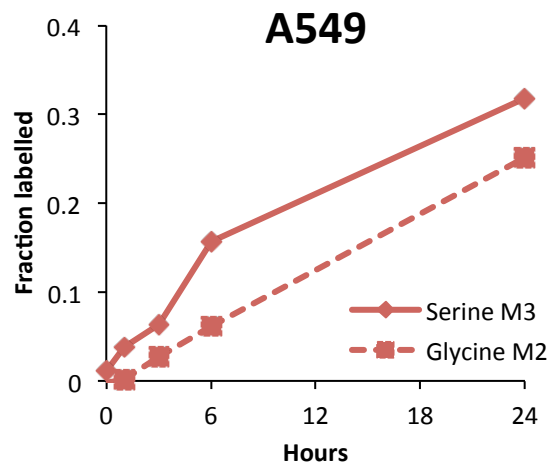

Supplementary Figure 1: Time course of serine and glycine labelling from  $^{13}\text{C}$ -glucose in NSCLC cell lines.

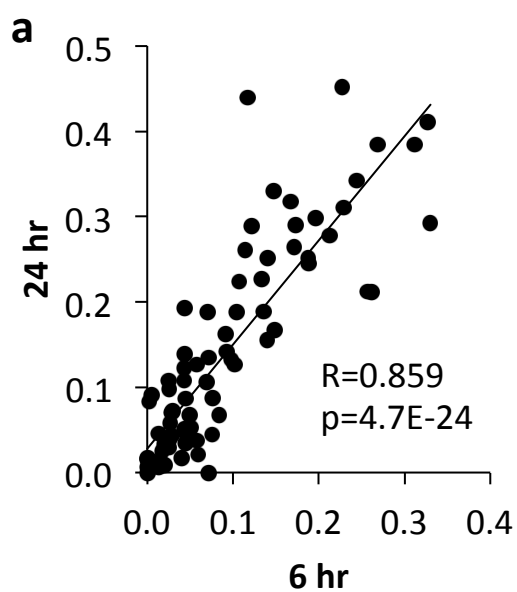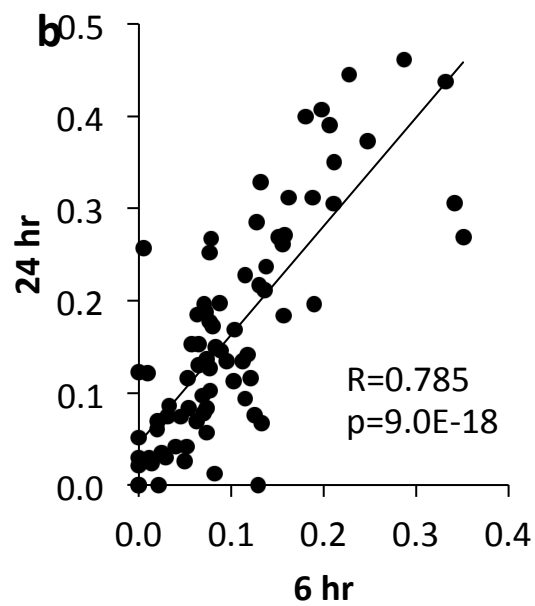

Supplementary Figure 2: Correlation of serine and glycine labelling at 6 and 24 hours. (a) Correlation between serine M3 labelling at 6 hours and 24 hours. (b) Correlation between glycine M2 labelling at 6 hours and 24 hours. Each data point is an individual cell line.

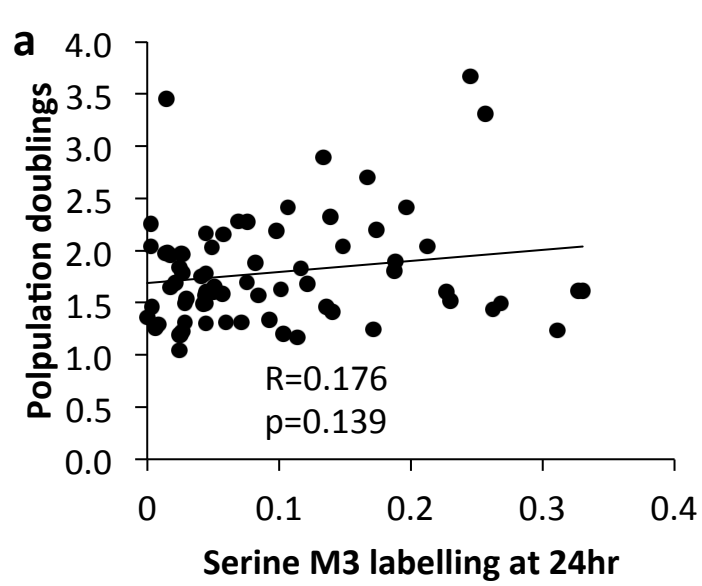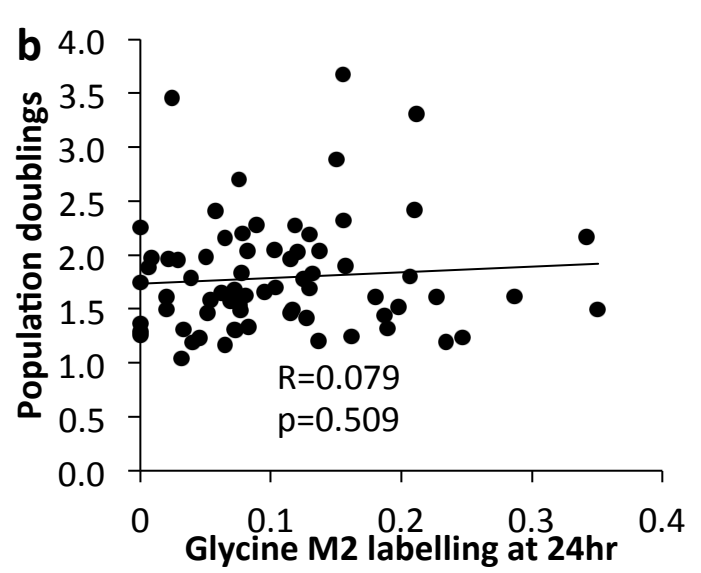

Supplementary Figure 3: Serine (a) or glycine (b) labelling does not correlate with population doubling time. Population doublings were quantified by assaying the relative increase in DNA content over 2 days.

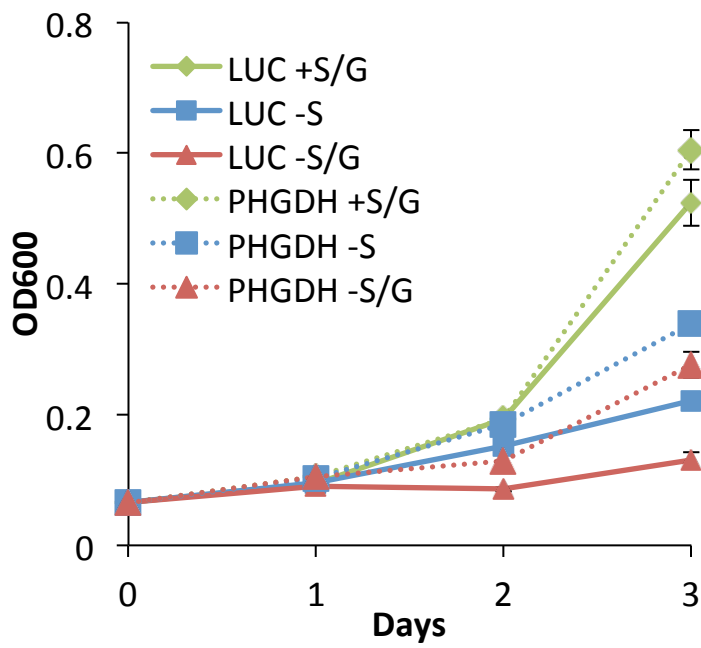

Supplementary Figure 4: PHGDH expression rescues growth of serine low cells in media lacking serine or serine and glycine. H2009 cells were infected with lentivirus expressing luciferase (LUC) or PHGDH and seeded in 96 well plates. Media was changed to full media, media lacking serine, or media lacking serine and glycine. Cell number was quantified by crystal violet staining on the indicated days.

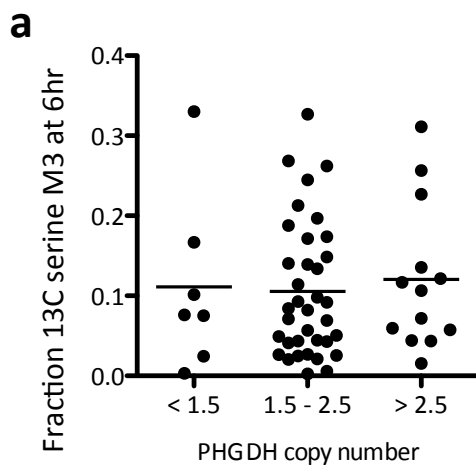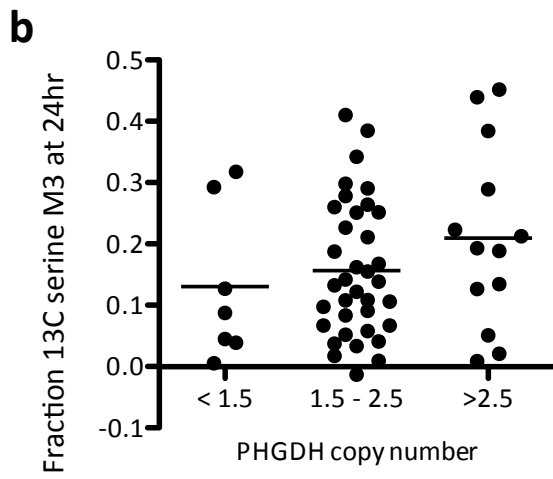

Supplementary Figure 5: Serine biosynthetic activity is not due to an increase in *PHGDH* copy number. *PHGDH* copy number data was obtained from the Broad-Novartis Cancer Cell Line Encyclopedia (CCLE), and the fraction of  $^{13}\text{C}$  serine M3 at 6 hours (a) and 24 hours (b) determined relative to copy number. No significant difference was found. *PHGDH* copy number for individual cell lines can be found in Supplementary table 2.

| <u>Labelling</u> | <u>Correlation cutoff</u> | <u>Geneset</u> | <u>p-value</u> | <u>q-value</u> |
|------------------|---------------------------|----------------|----------------|----------------|
| serine 6hr       | p<0.05                    | NFE2L2.V2      | 1.44E-20       | 2.71E-18       |
| serine 24hr      | p<0.05                    | NFE2L2.V2      | 7.89E-17       | 1.49E-14       |
| glycine 6hr      | p<0.05                    | NFE2L2.V2      | 1.30E-4        | 1.56E-3        |
| glycine 24       | p<0.05                    | NFE2L2.V2      | 3.47E-15       | 6.55E-13       |

Supplementary Figure 6: Serine and glycine biosynthesis correlates with a NRF2 target gene signature (gene set NFE2L2.V2). Genes that correlated with the metabolite parameters (pearson correlation,  $p < 0.05$ ) were subjected to gene set enrichment analysis (GSEA) using the Broad Institute GSEA software against oncogenic signature gene sets.

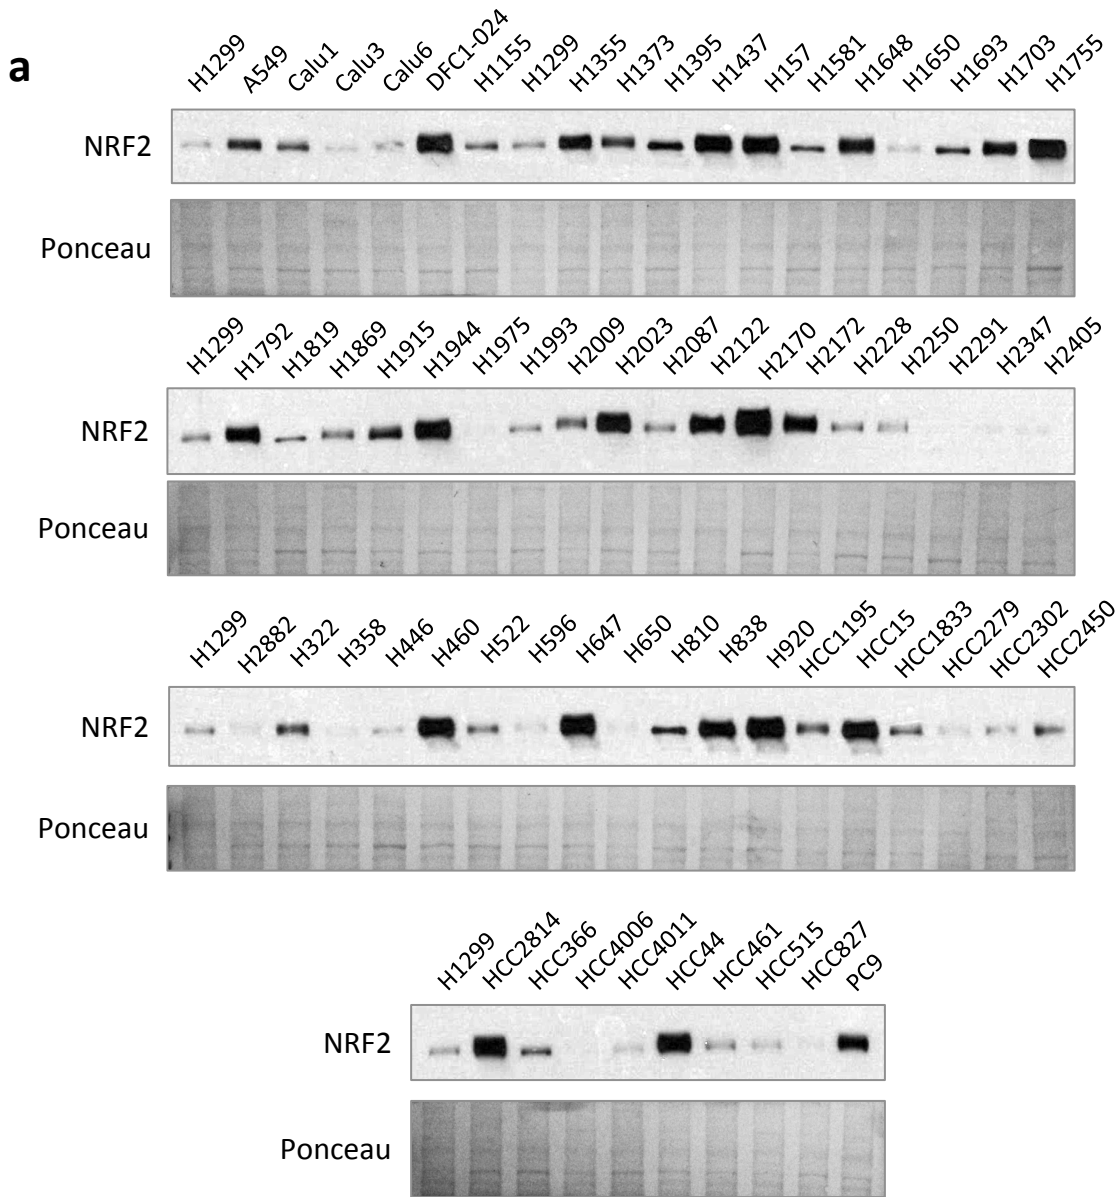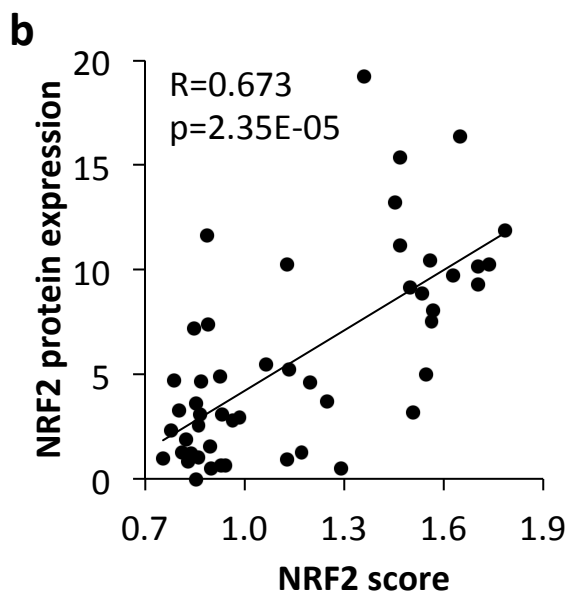

Supplementary Figure 7: Determination of NRF2 nuclear abundance in NSCLC cell lines. (a) Western blot of NRF2 in NSCLC cell line nuclear extracts. Ponceau staining denotes equal protein loading. (b) NRF2 protein expression correlates significantly with a NRF2 activity score (see Supplementary Figure 8).

**a**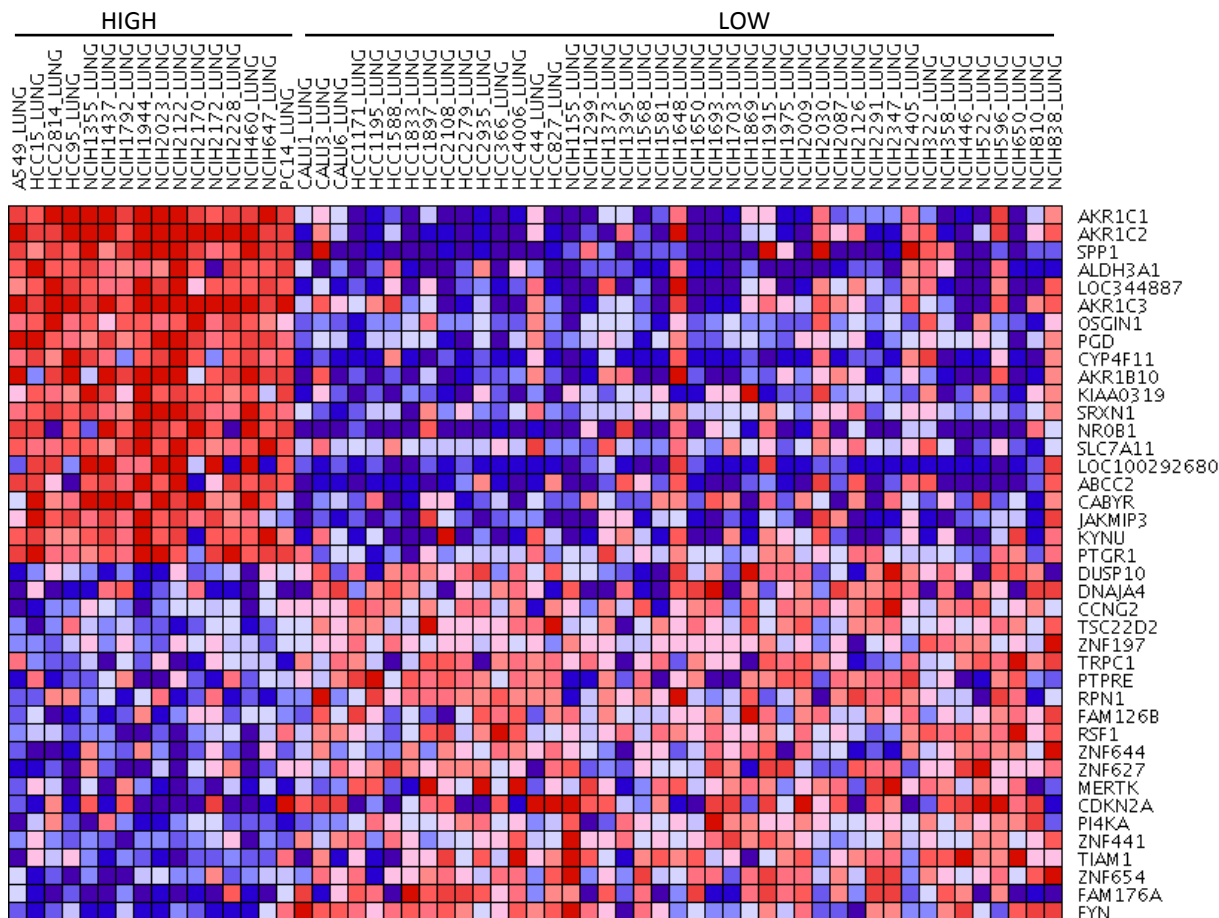**b**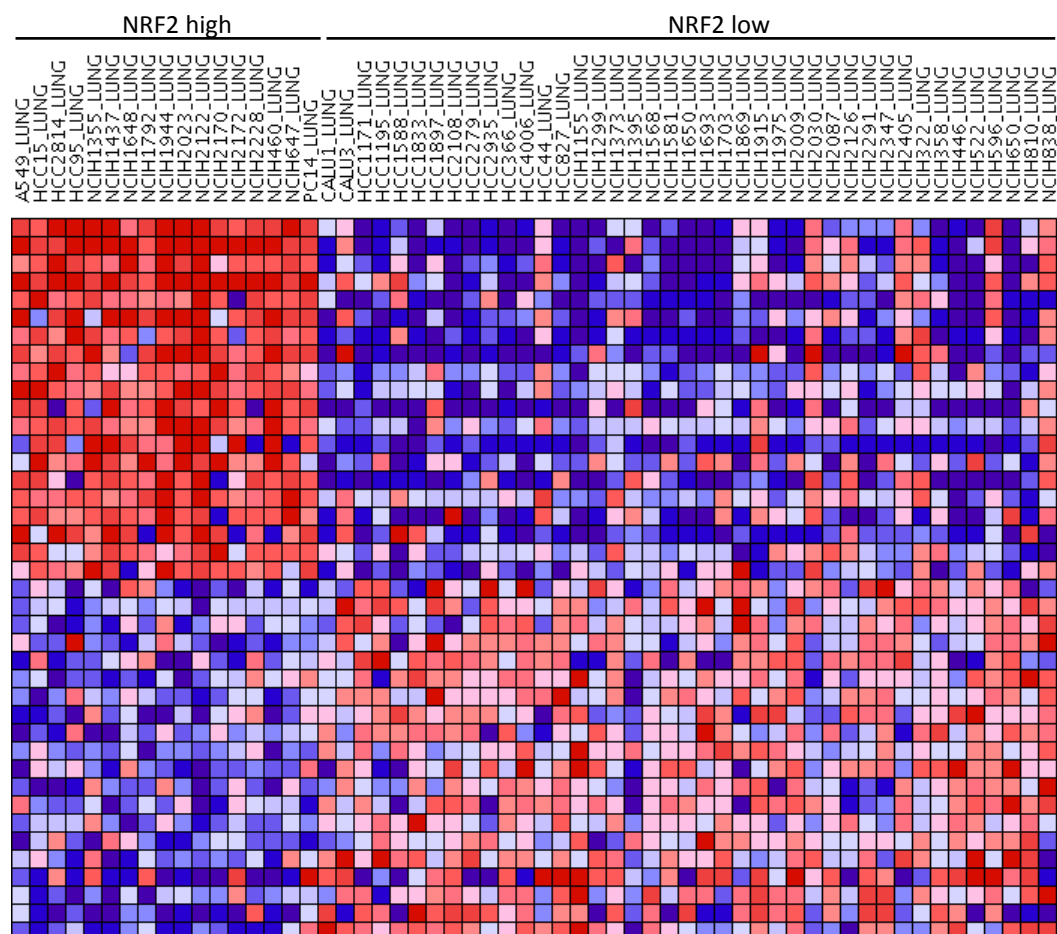

Supplementary Figure 8: Determination of the NRF2 “high” vs. “low” grouping. (a) Cell lines were separated by the expression of five classic NRF2 target genes: *NQO1*, *GCLC*, *GCLM*, *SLC7A11*, and *AKR1C1*. Groups were compared using the Broad-Novartis Cancer Cell Line Encyclopedia (CCLE) differential expression tool. The 20 most upregulated genes from were used to calculate a NRF2 score. (b) The cell lines were separated into “NRF2 high” and “NRF2 low” groups by their NRF2 score.



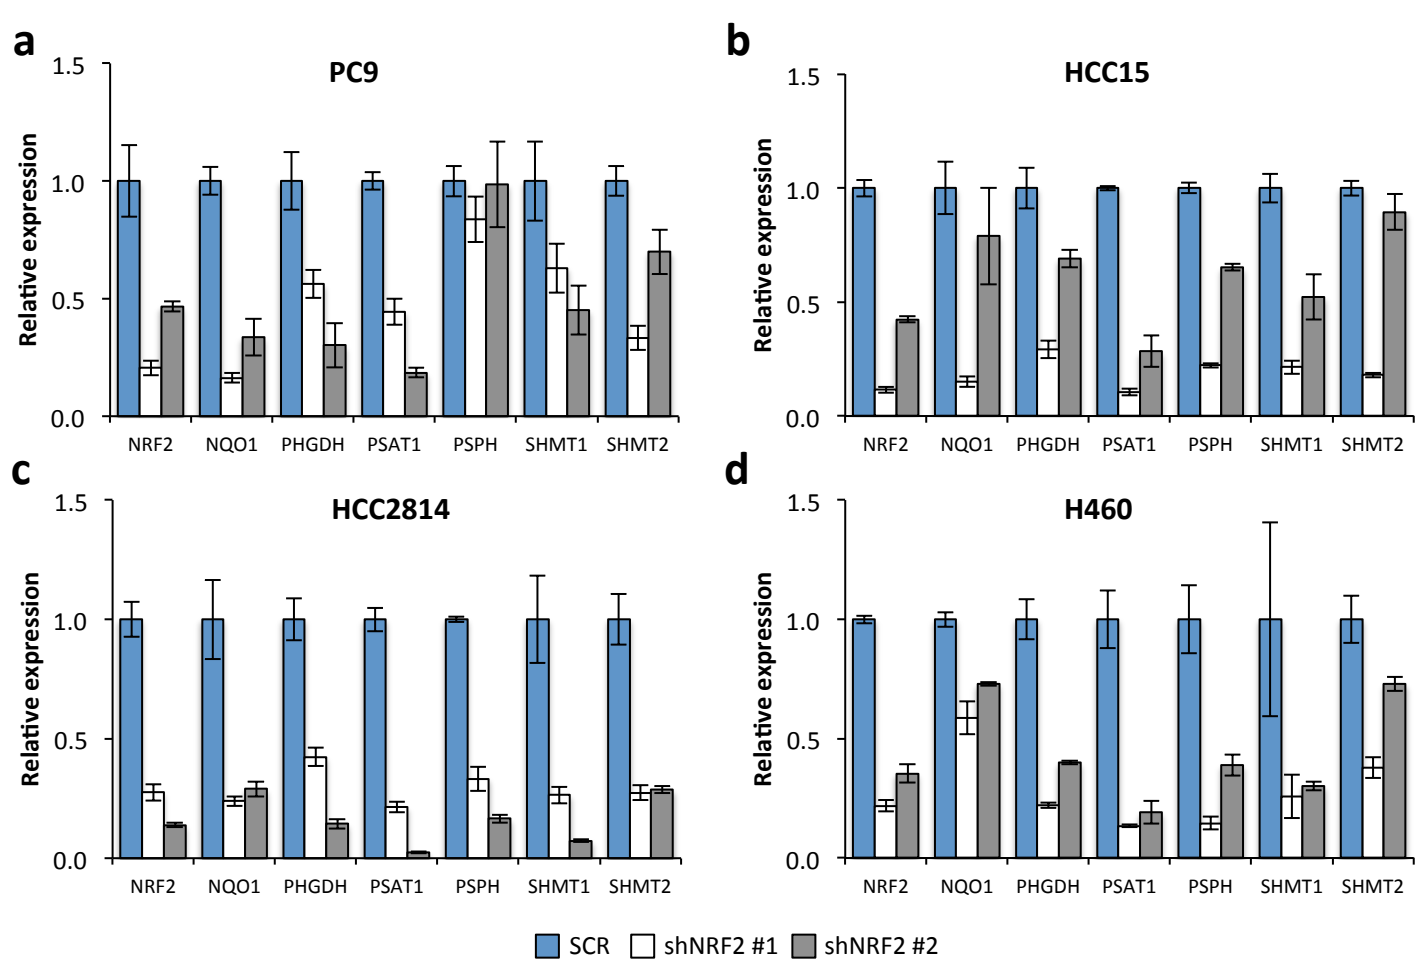

Supplementary Figure 9: NRF2 regulates the expression of serine/glycine biosynthesis enzymes. (a-d) The mRNA expression of cell lines expressing scramble shRNA (SCR) or NRF2 shRNAs was quantified by real-time PCR and normalized to the expression in the scramble controls.

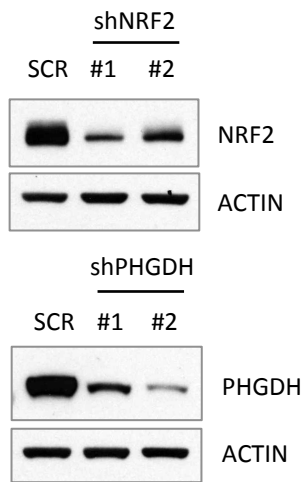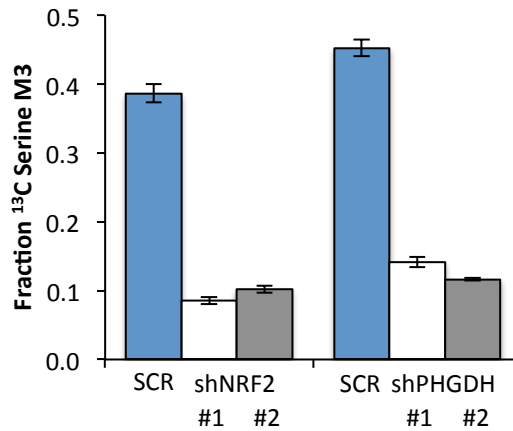

Supplementary Figure 10: NRF2 and PHGDH regulate serine biosynthesis. Cells were grown in the presence of U-<sup>13</sup>C-glucose for 24 hours and metabolites were extracted and analysed by LC/MS. (Left) Western blot analysis of (Top) NRF2 and ACTIN protein expression in lysates from A549 cells expressing scramble (SCR) or NRF2 shRNAs #1 or #2. Stable cell lines were made by selecting in 1ug/ml puromycin for 5 days. (Bottom) Western blot analysis of PHGDH and ACTIN protein expression in lysates from A549 cells expressing scramble (SCR) or PHGDH shRNAs #1 or #2. Protein expression was analysed 3 days after infection with lentivirus. ( Right) Analysis of the fractional <sup>13</sup>C-labelling of serine derived from glucose.

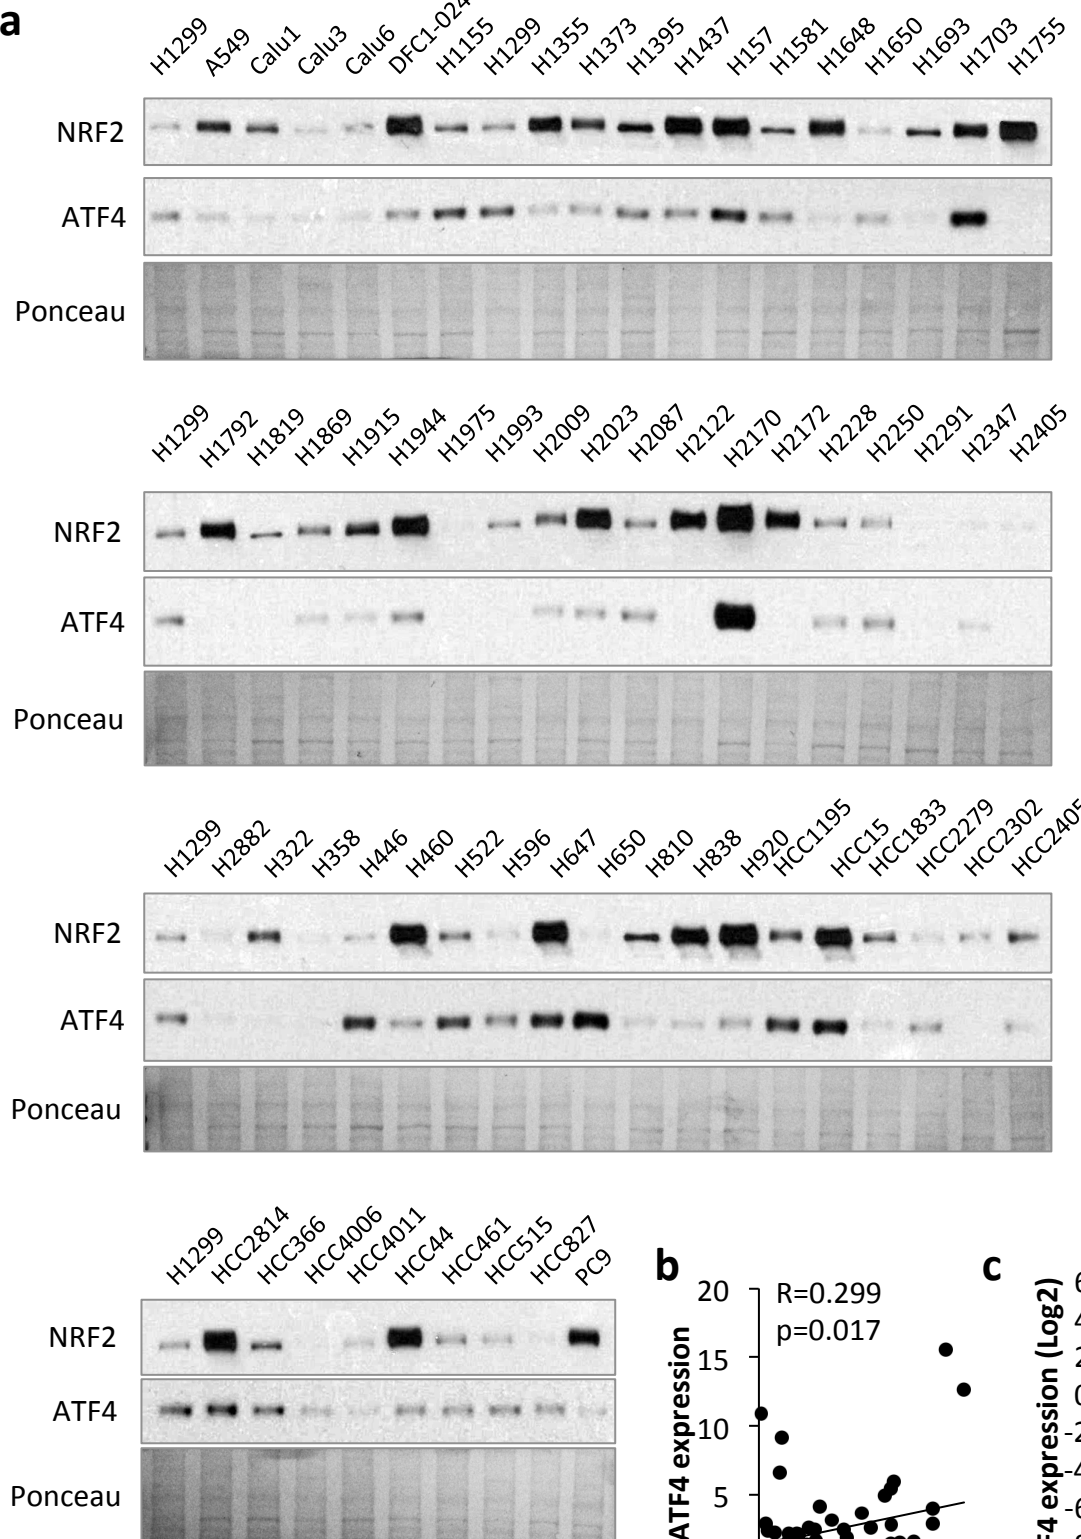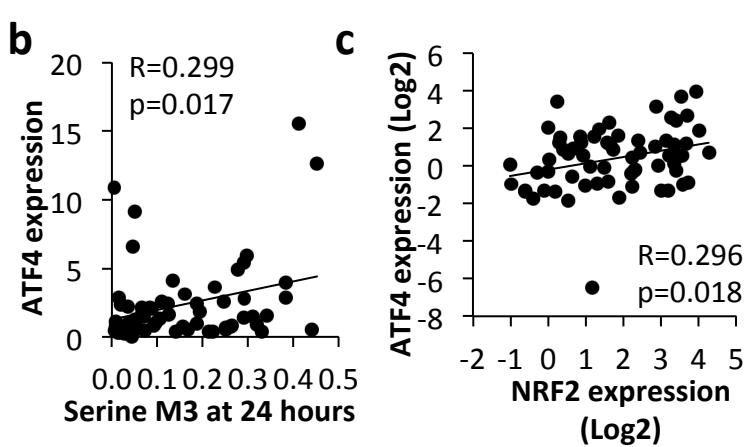

Supplementary Figure 11: Determination of NRF2 and ATF4 nuclear abundance in NSCLC cell lines. (a) Western blot of NRF2 and ATF4 in NSCLC cell line nuclear extracts. Ponceau staining denotes equal protein loading. NRF2 and Ponceau blots are from Supplementary Figure 6. (b) ATF4 protein expression correlates with serine biosynthesis. (c) ATF4 expression correlates with NRF2 expression.

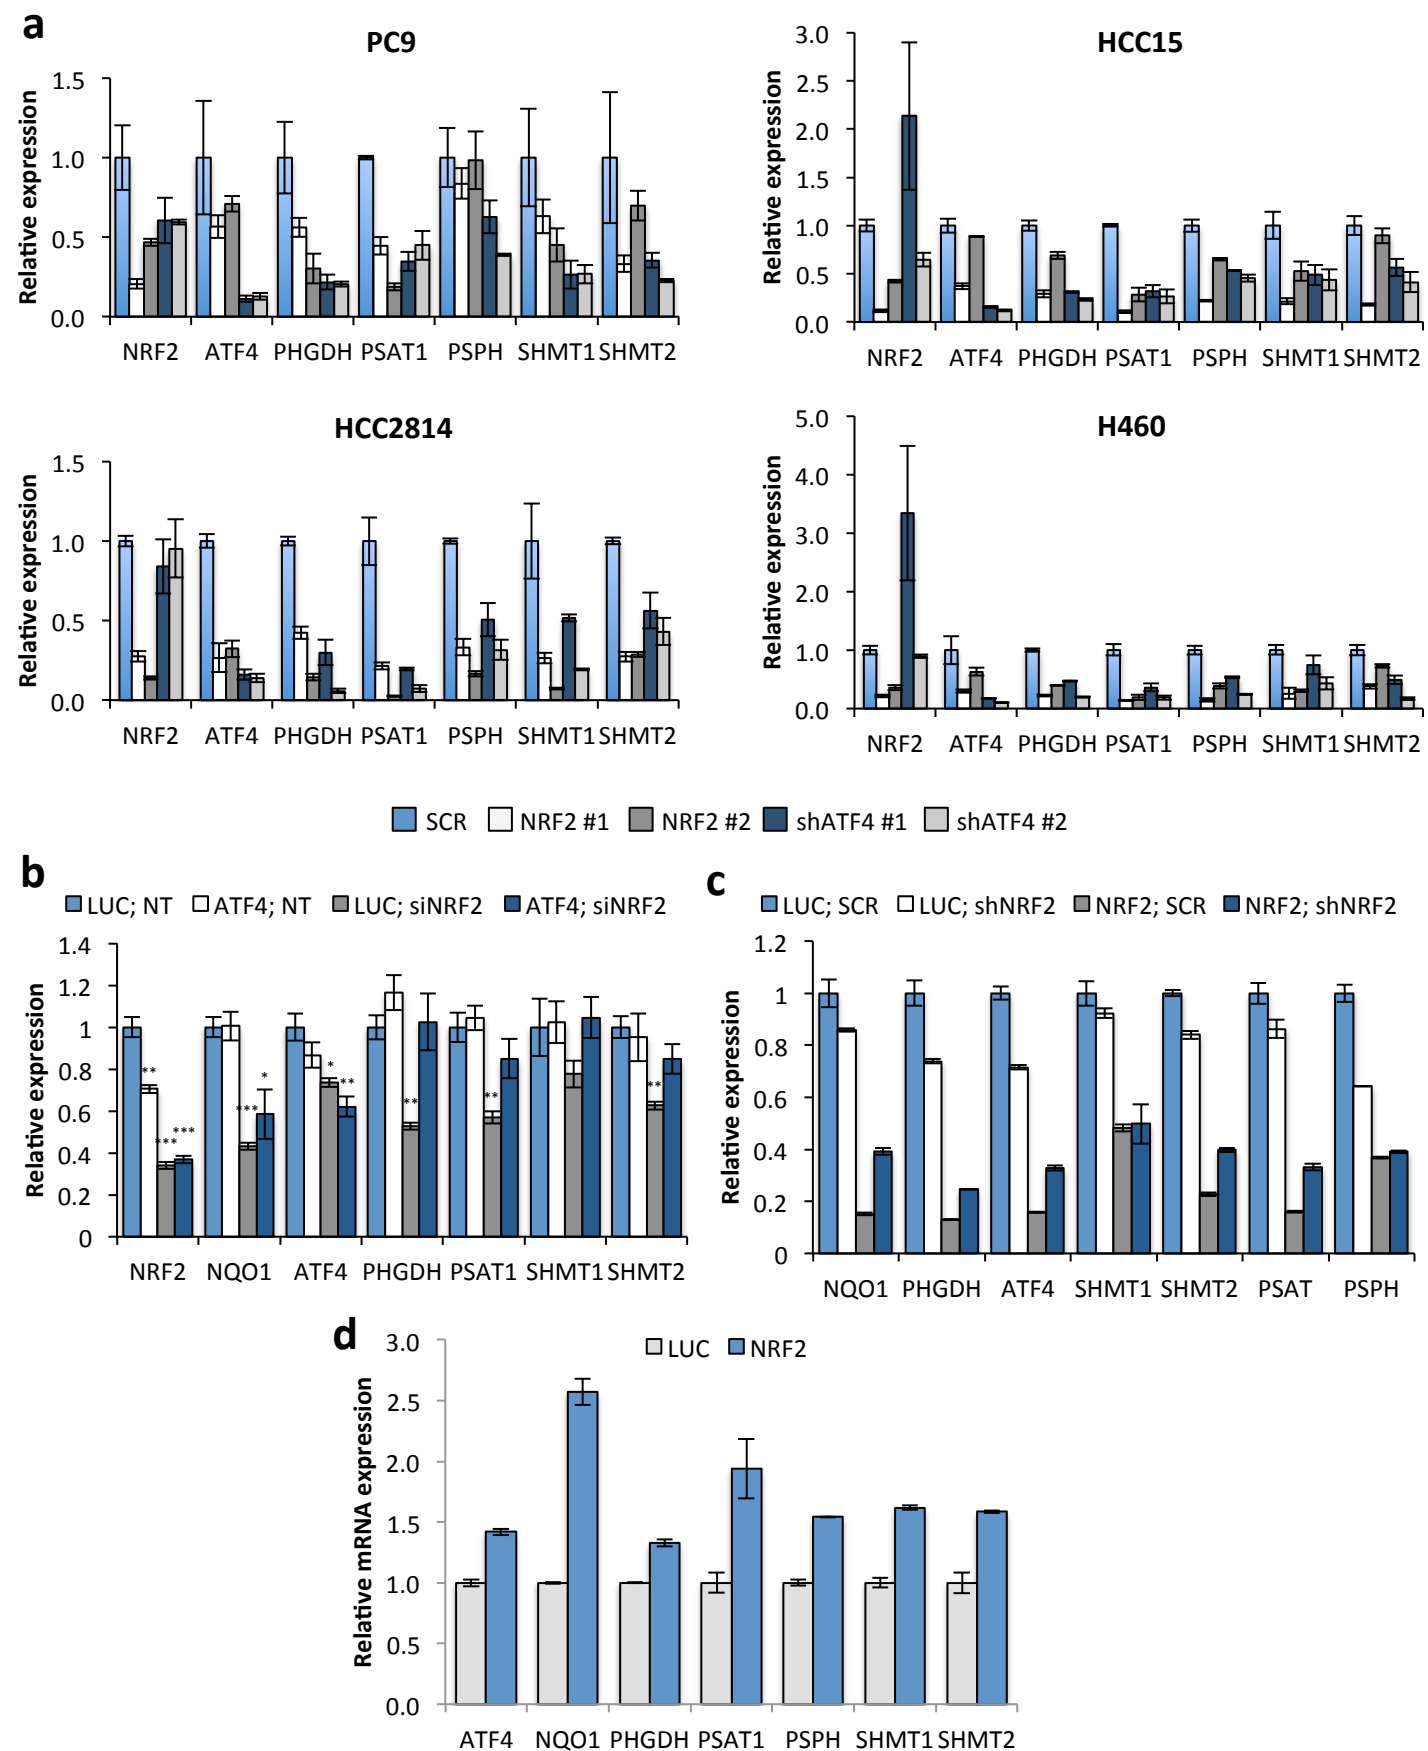

Supplementary Figure 12: NRF2 regulates the expression of serine/glycine biosynthesis genes through ATF4. (a) The mRNA expression of cell lines expressing scramble shRNA (SCR), NRF2 or ATF4 shRNAs was quantified by real-time PCR and normalized to the expression in the scramble controls. (b) ATF4 rescues the expression of serine biosynthesis enzymes in A549 cells transfected with NRF2 siRNA. (c) The specificity of shNRF2 #1 is demonstrated by partial rescue of NQO1, ATF4, and ATF4 target gene expression by reintroduction of a NRF2 cDNA. shNRF2 #1 targets the NRF2 5'UTR and not the NRF2 cDNA. (d) Ectopic NRF2 expression in H1975 cells induces the expression of NQO1, ATF4, and serine biosynthesis genes.

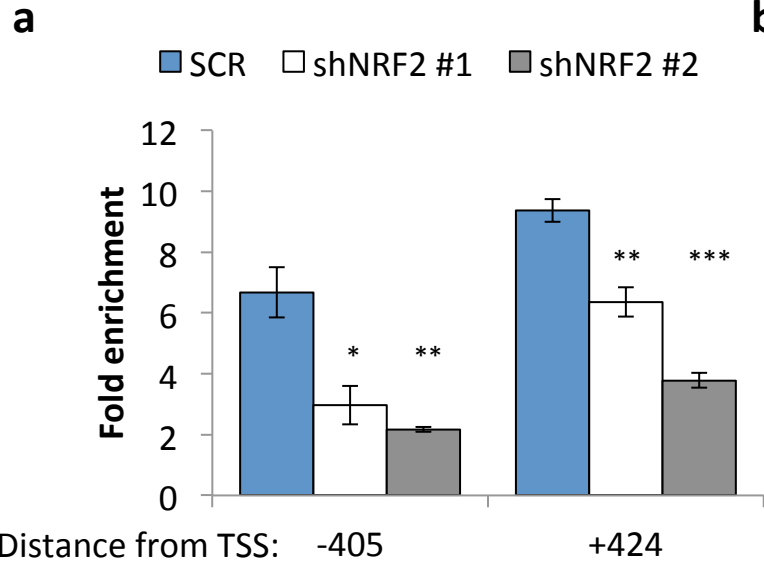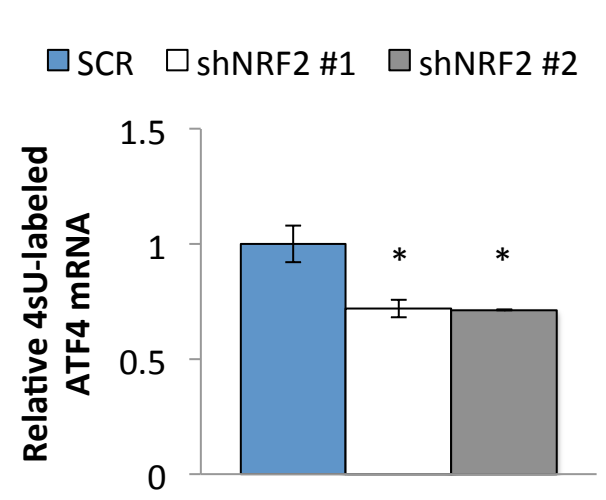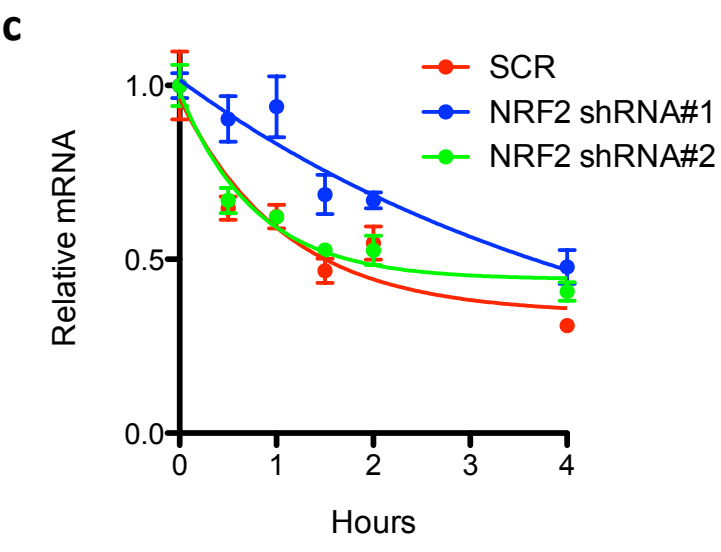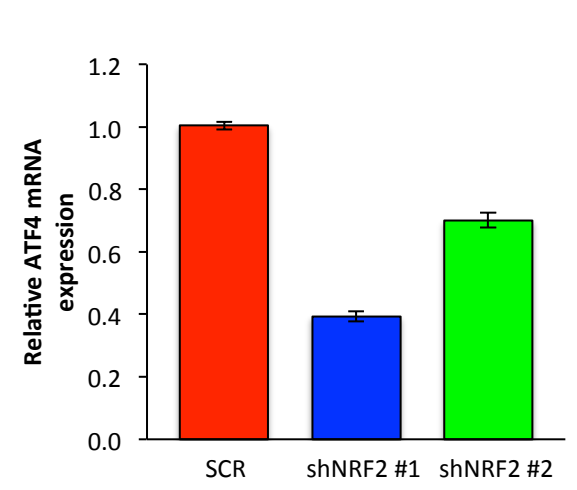

Supplementary Figure 13: NRF2 regulates ATF4 transcription. (a) Chromatin immunoprecipitation of RNA pol II (pSer5) binding to the ATF4 promoter. (b) Analysis of the levels of newly synthesized ATF4 transcript using 4-thiouridine (4sU) pulse-labeling. Cells were labelled with 4sU for 60 minutes, after which time the RNA was purified and the 4sU residue linked to a biotin molecule. The biotinylated RNA was purified with streptavidin beads, cDNA was transcribed and levels are assayed by real-time PCR. ATF4 levels were normalized to  $\beta$ -actin. (c-d) Determination of ATF4 mRNA half-life. (c) ATF4 half-life was examined following 5ug/mL Actinomycin D treatment for the indicated times in A549 cells stably expressing scramble or NRF2 shRNA. ATF4 mRNA levels were normalized to time 0. (d) Total ATF4 mRNA expression levels in the cells from (c).

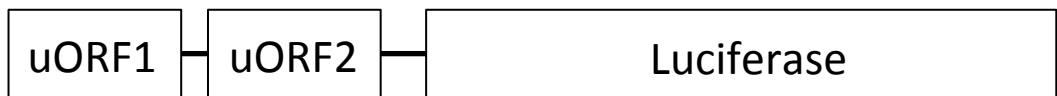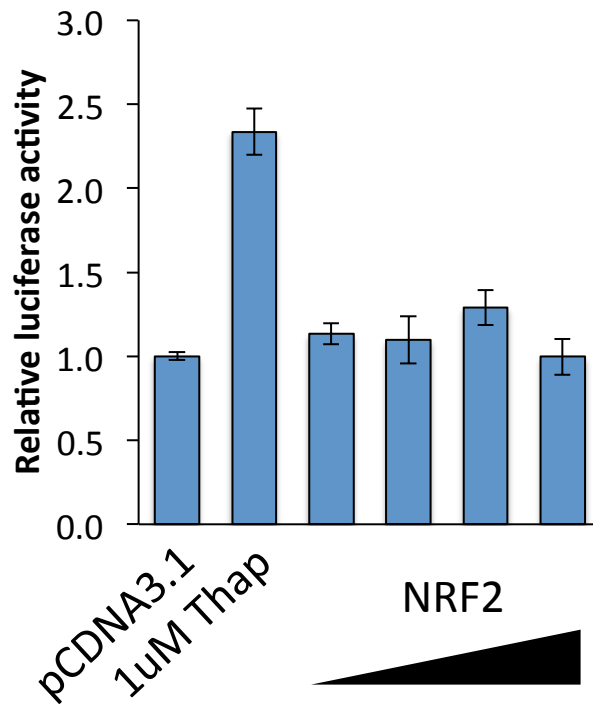

Supplementary Figure 14: Determination of ATF4 translation in a reporter assay. 293Ts were co-transfected with the ATF4 translation reporter, a renilla control plasmid, and pcDNA 3.1 or pcDNA3.1-NRF2 (range 1-200ng). Alternatively cells were treated with 1uM thapsigargin for 4 hours.

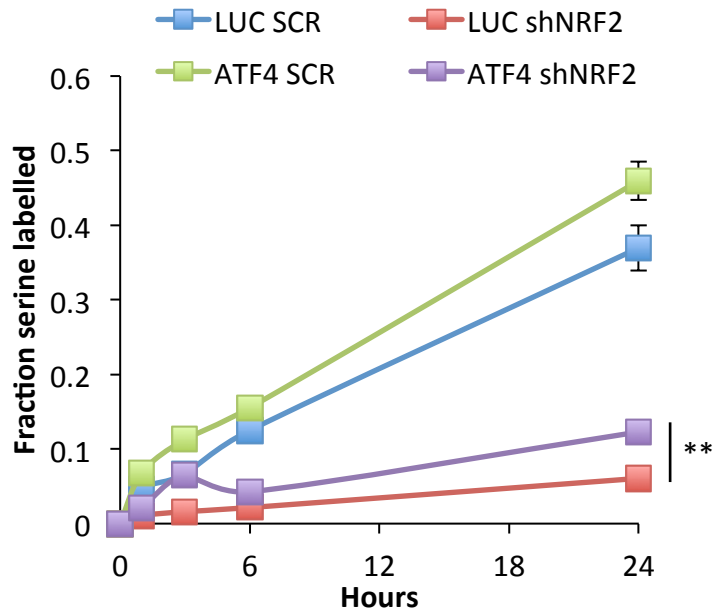

Supplementary Figure 15: ATF4 partially rescues serine biosynthesis following NRF2 knockdown. A549 cells were infected with lentivirus encoding mATF4 prior to infection with scramble or NRF2-targeting lentivirus. Cells were fed  $^{13}\text{C}$ -glucose for the indicated time points, metabolites extracted, and fraction serine labelling determined by LC/MS.

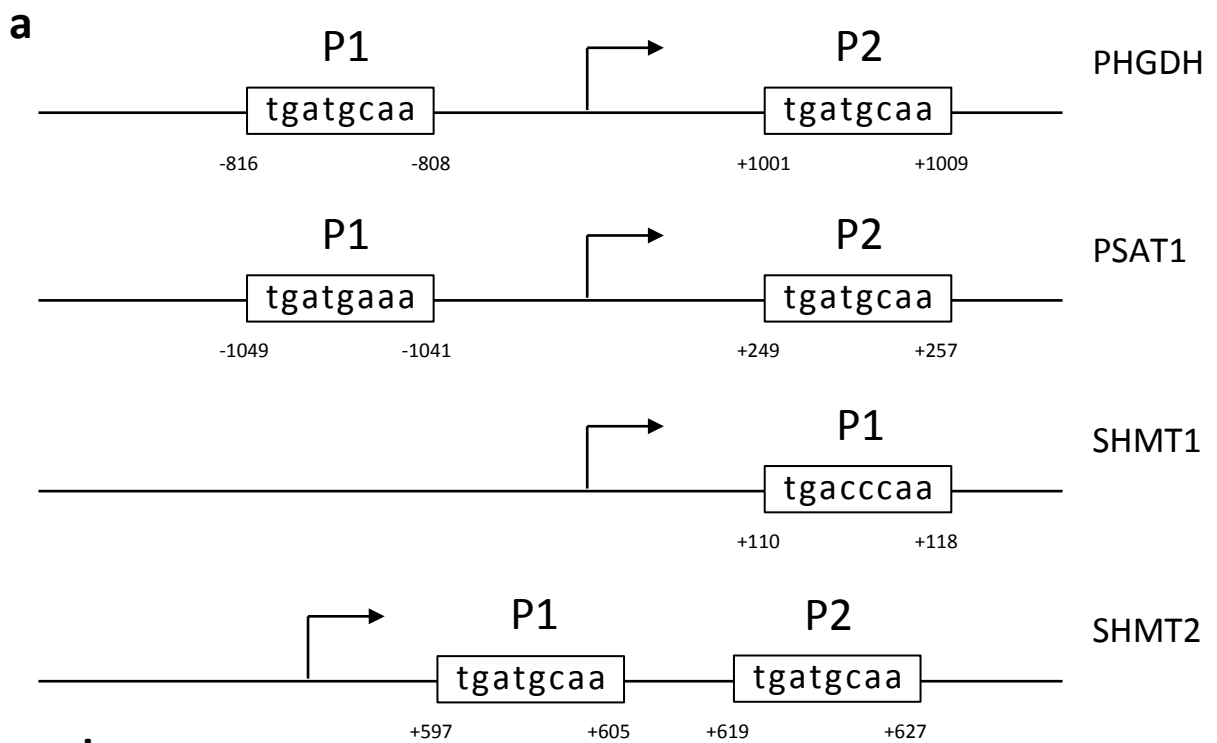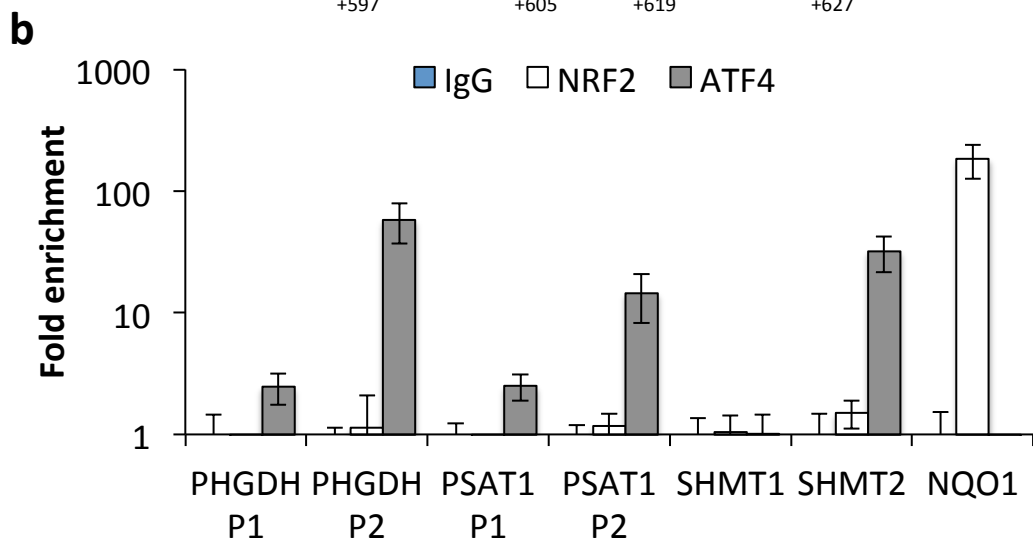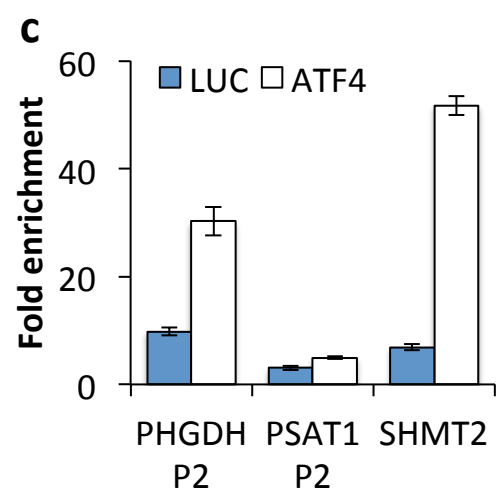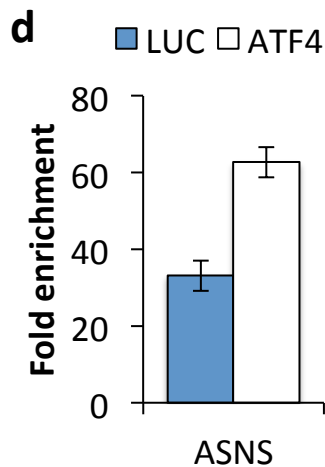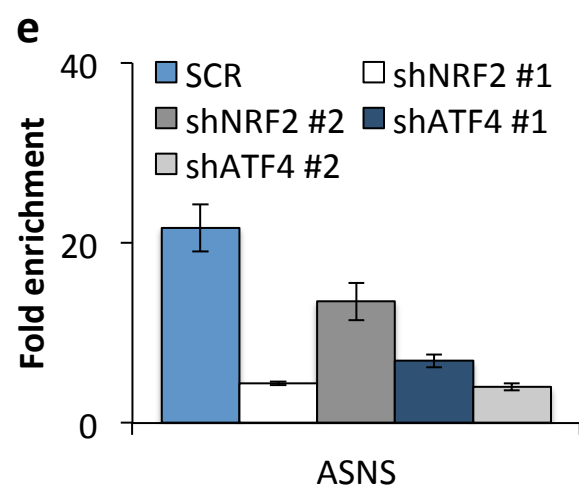

Supplementary Figure 16: Identification of ATF4 binding sites on the PHGDH, PSAT1 and SHMT2 promoters. (a) Putative ATF4 binding sites in the PHGDH, PSAT1, SHMT1 and SHMT2 promoters. (b) ATF4 binds to PHGDH P2, PSAT1 P2 and SHMT2 in A549 cells. NRF2 does not bind at these sites, despite binding to the NQO1 promoter. (c-d) ATF4 overexpression increases ATF4 binding to PHGDH, PSAT1, SHMT2 (c) and the classic ATF4 target ASNS (d) in H1975 cells. (e) NRF2 and ATF4 knockdown decreases ATF4 binding to ASNS in A549 cells.



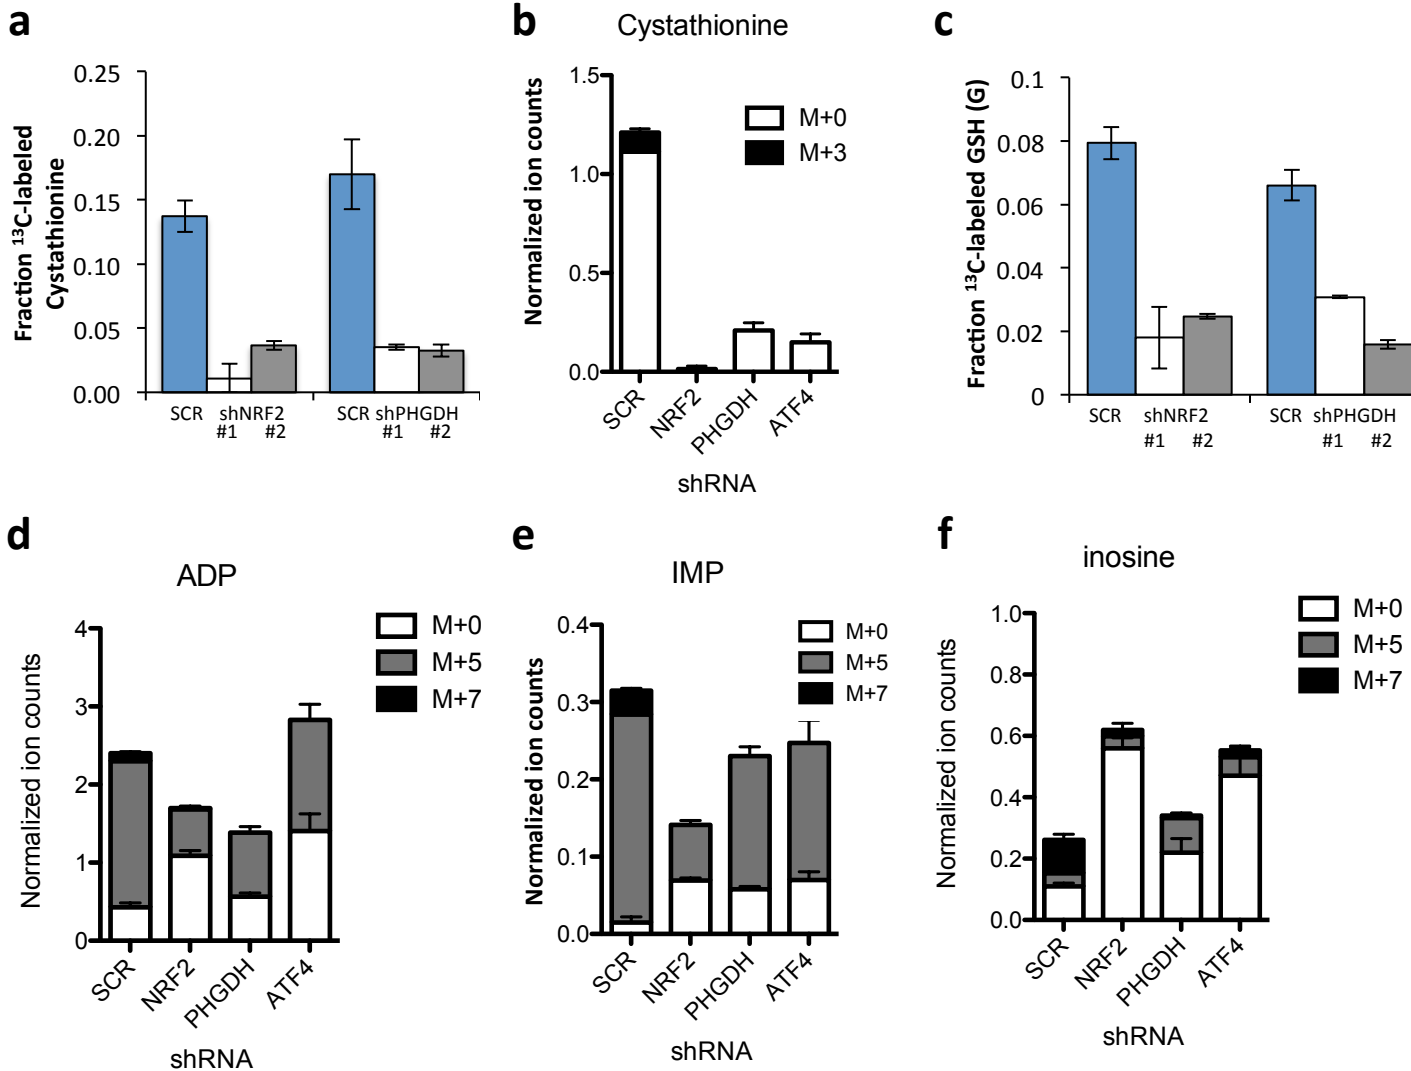

Supplementary Figure 17: Knockdown of NRF2, PHGDH, or ATF4 in A549 cells decreases incorporation of PHGDH-derived serine into downstream metabolites. Decreased labelling is observed in cystathionine (M+3) (a,b), the glycine moiety on glutathione (M+2) (c), and M+7 labelling of ADP (d) IMP (e) and inosine (f). (d-f) M+0 denotes no carbons labelled, M+5 denotes labelling on the ribose moiety, M+7 labelling denotes 5 carbons from ribose and 2 carbons from glycine or one-carbon units, and M+9 labelling denotes 5 carbons from ribose, 2 carbons from glycine, and 2 carbons from one-carbon units. No M+9 labelling was detected.

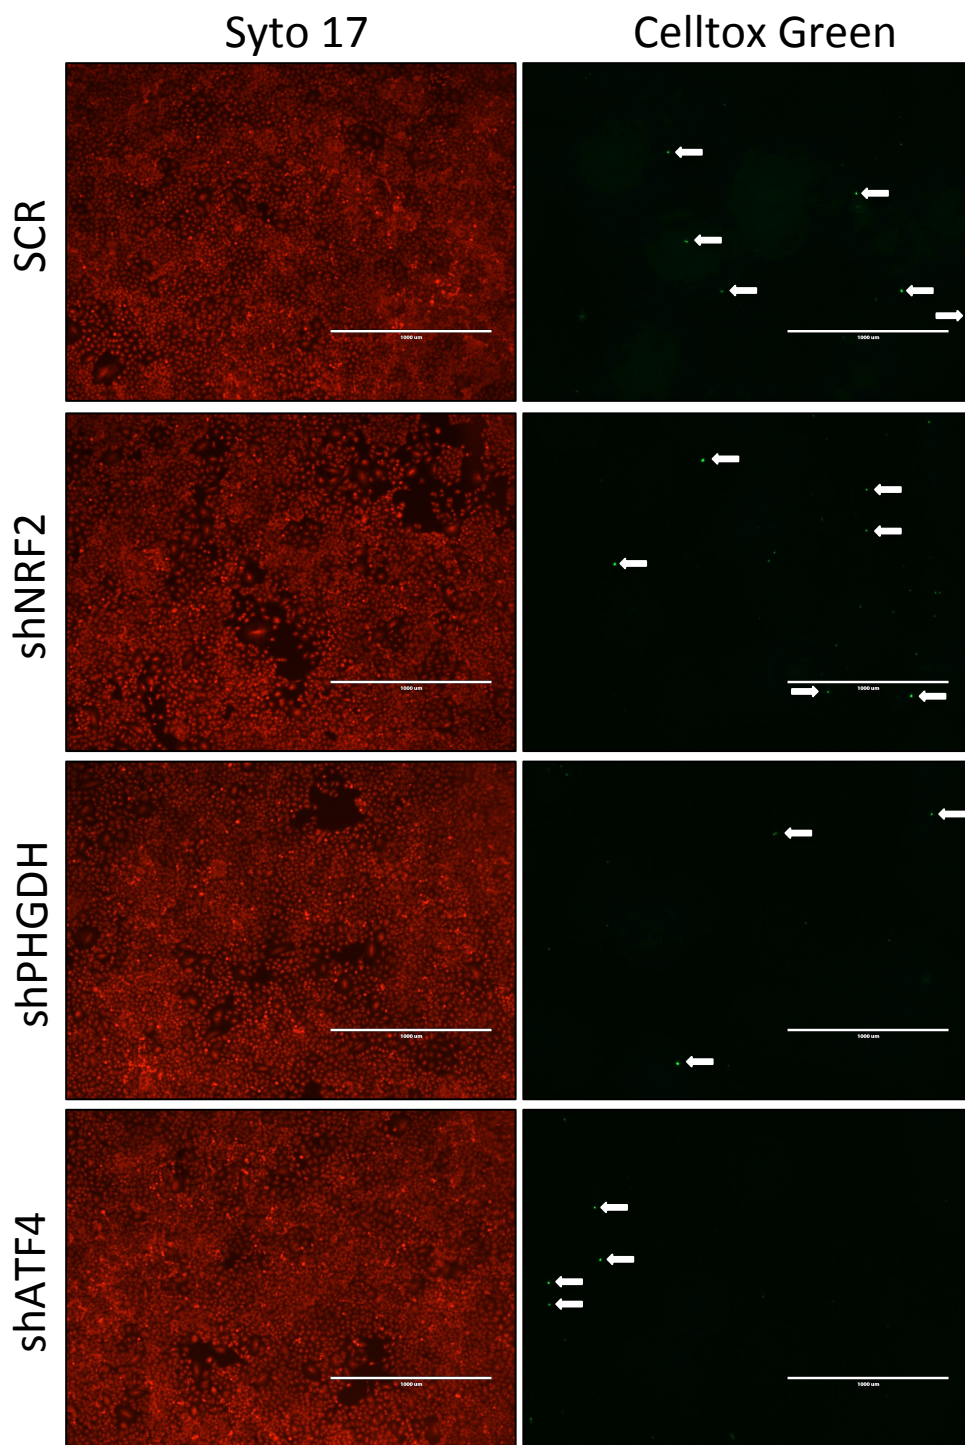

Supplementary Figure 18: No loss of viability of cells expressing SCR, NRF2, PHGDH, and ATF4 shRNAs at the time of metabolite extraction. Cells were stained with Syto17 to label all cells, and Celltox Green to label apoptotic cells. Apoptotic cells were rare in all populations.

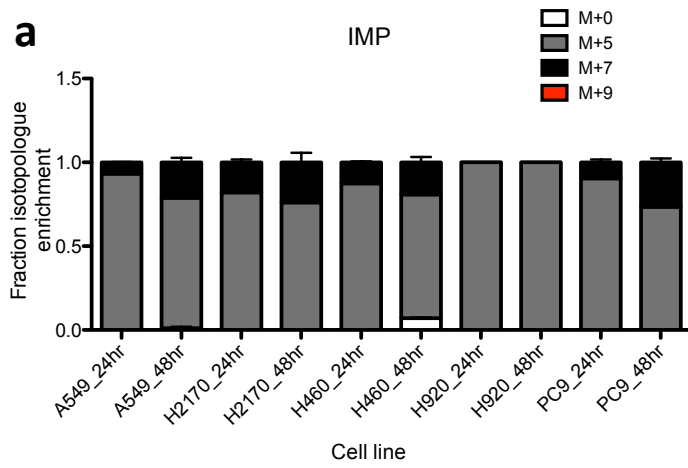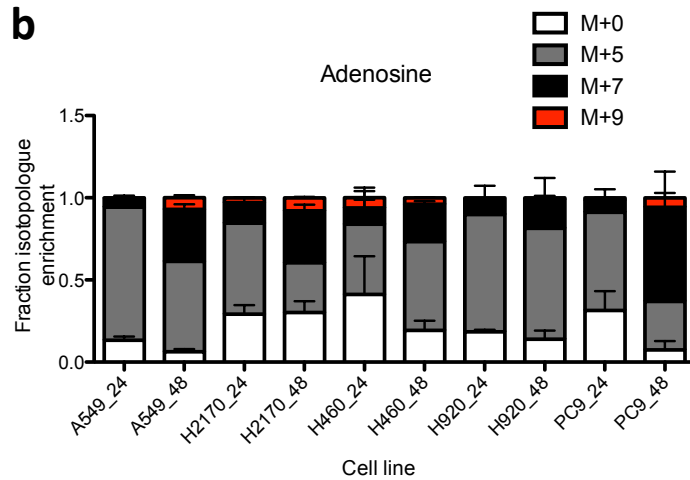

Supplementary Figure 19: Metabolite labeling in serine high cell lines. PHGDH-derived serine is incorporated into nucleotide precursors inosine monophosphate (IMP) (a) and adenosine (b) through the generation of glycine and one-carbon units. Cells were labelled with  $^{13}\text{C}$ -glucose for 24 or 48 hours as indicated. M+0 denotes no carbons labelled, M+5 denotes labelling on the ribose moiety, M+7 labelling denotes 5 carbons from ribose and 2 carbons from glycine or one-carbon units, and M+9 labelling denotes 5 carbons from ribose, 2 carbons from glycine, and 2 carbons from one-carbon units.

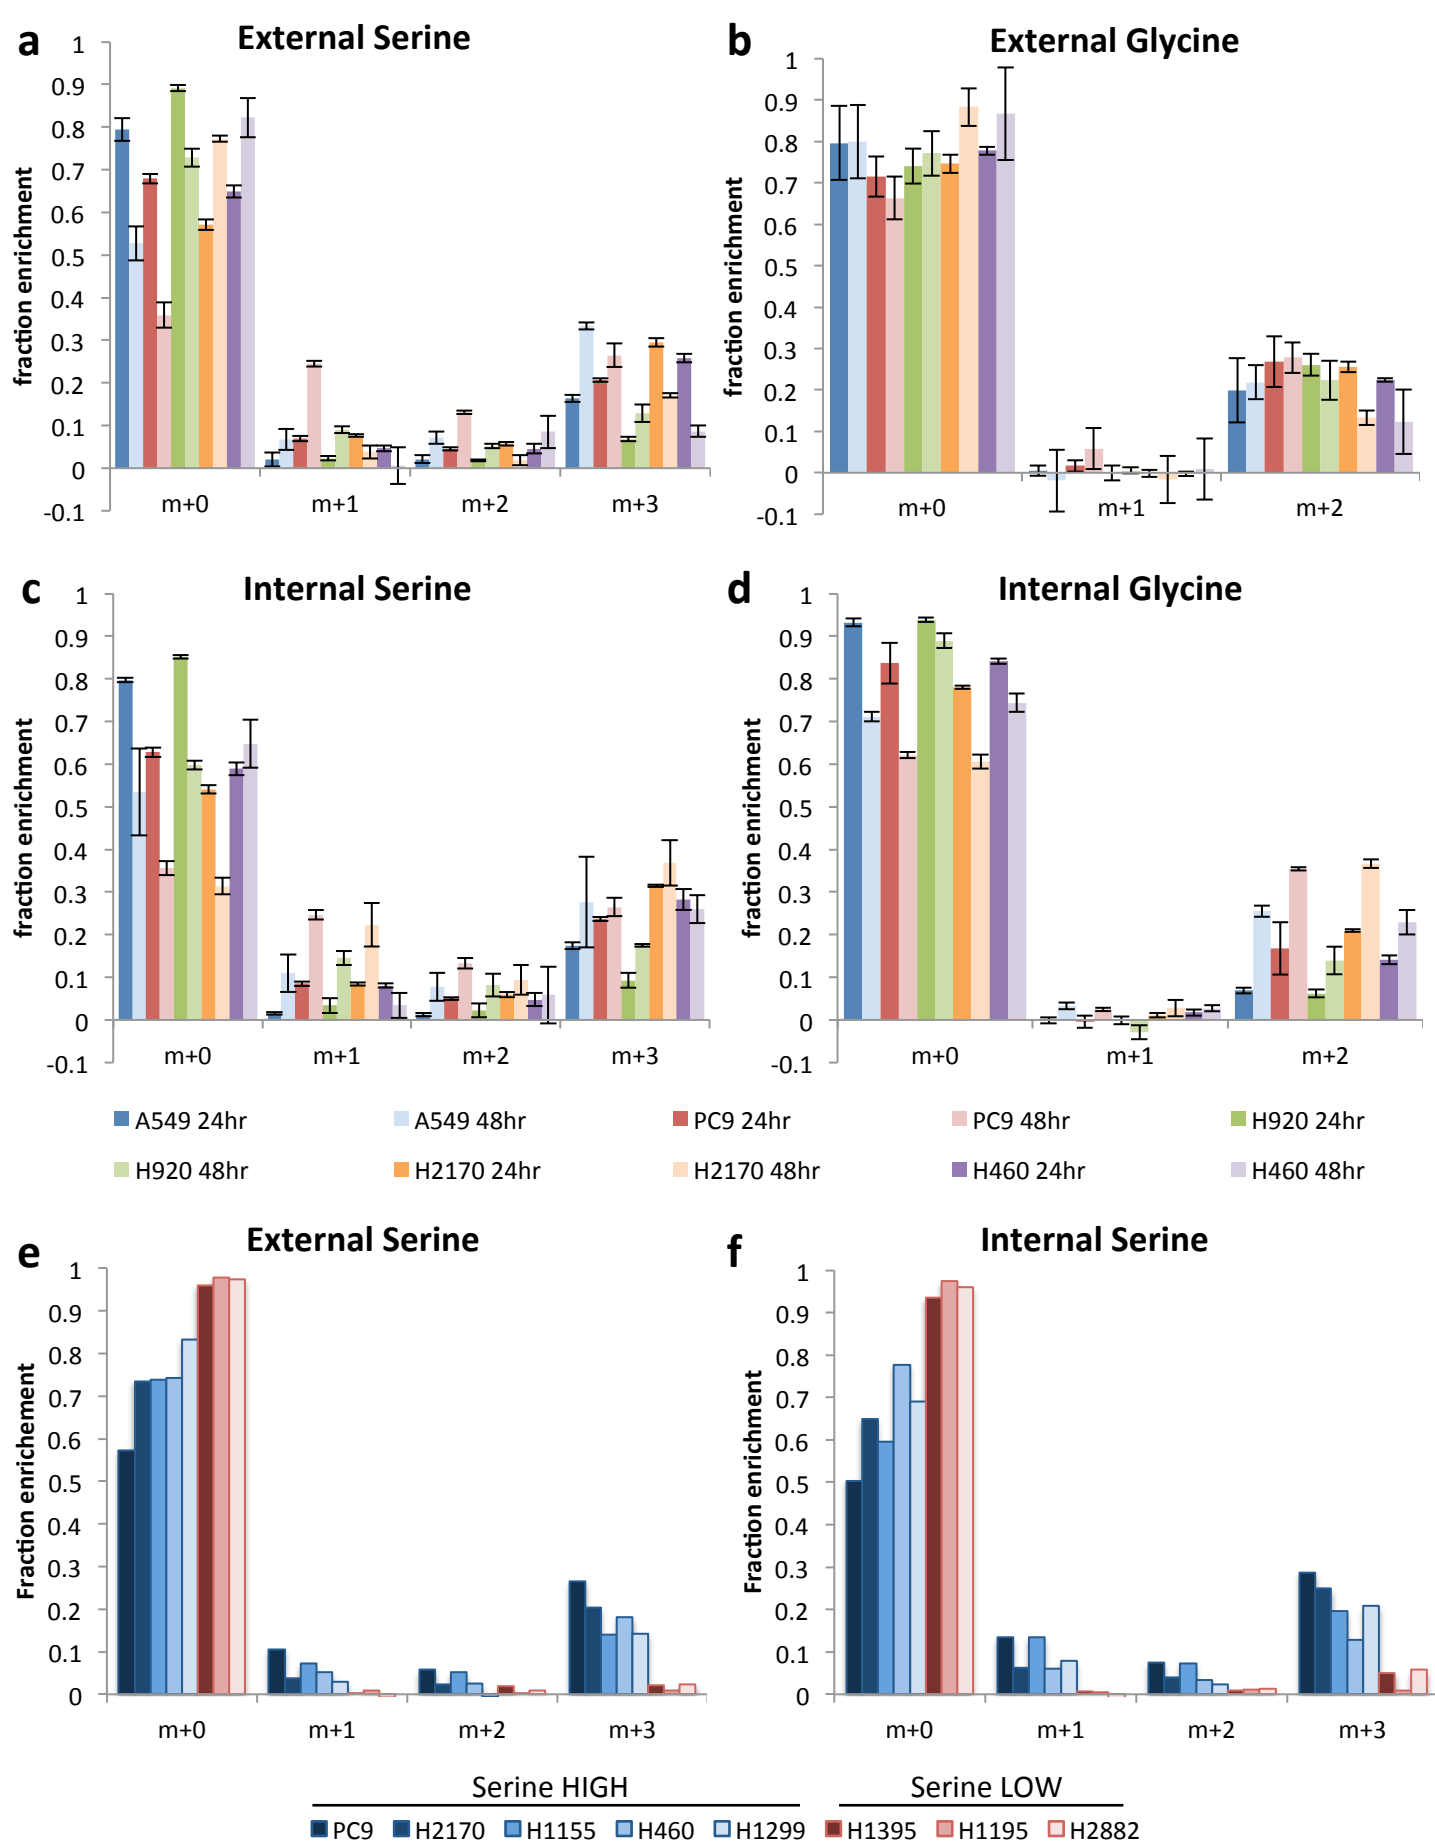

Supplementary Figure 20: Analysis of the intracellular and extracellular labelling of serine and glycine in serine high cell lines. (a-b) Extracellular labelling of (a) serine and (b) glycine at 24 and 48 hours after <sup>13</sup>C-glucose labelling. (c-d) Intracellular labelling of (c) serine and (d) glycine at 24 and 48 hours after <sup>13</sup>C-glucose labelling. (e-f) Extracellular (e) and intracellular (f) labeling of serine labeling in serine high (blue) and serine low (red) cell lines 6 hours after <sup>13</sup>C-glucose labelling.

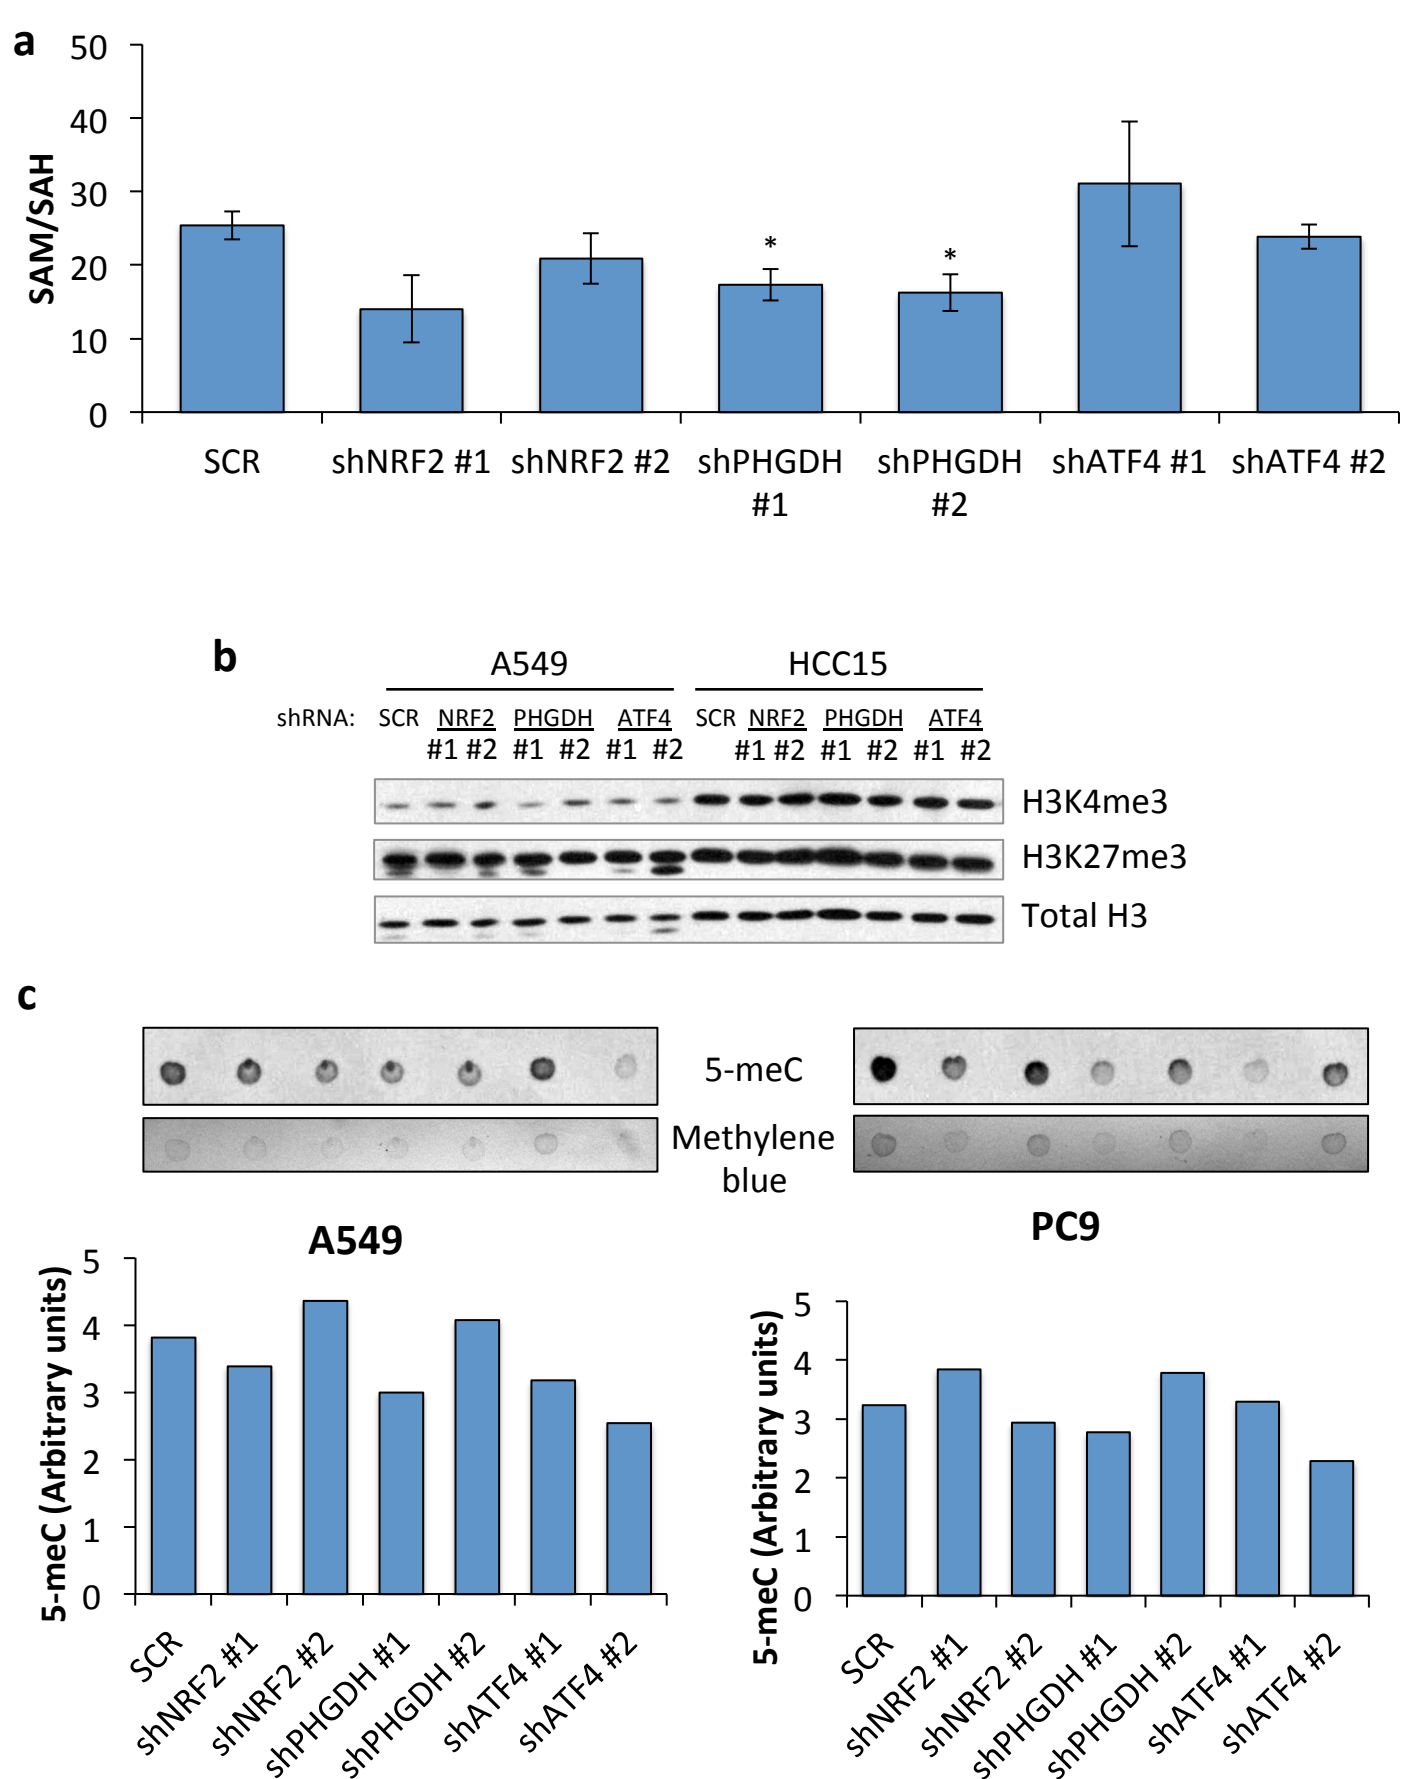

Supplementary Figure 21: Analysis of the s-adenosyl methionine/s-adenosyl homocysteine ratio and methylation of cellular targets in cells following knockdown of NRF2, PHGDH and ATF4. (a) SAM/SAH ratio following NRF2, PHGDH and ATF4 knockdown in A549 cells. SAM and SAH levels were determined by LC/MS. (b) Western analysis of histone methylation from histone extracts. (c) Dot blot analysis of methylcytosine levels in DNA. Bar graphs indicate normalization of methylcytosine levels to DNA loading (methylene blue staining).

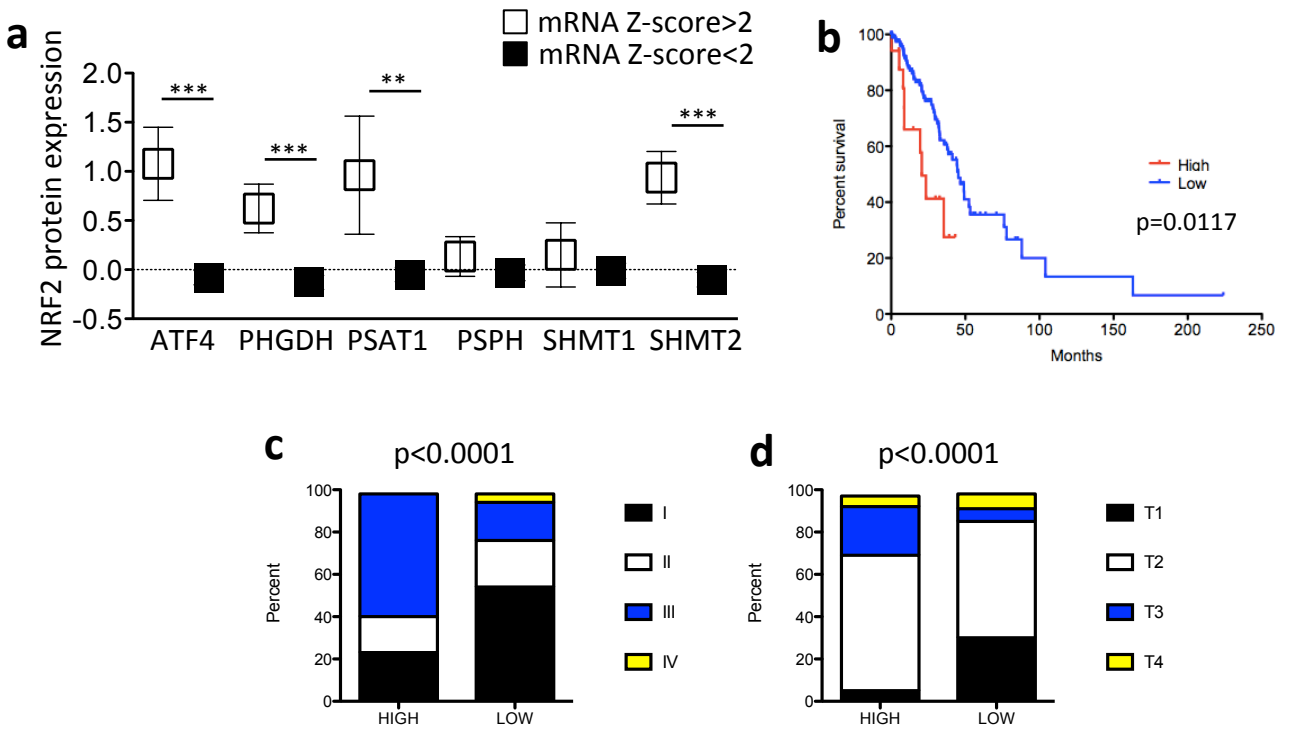

Supplementary Figure 22: High expression of PHGDH, PSAT1 and SHMT2 confers poor prognosis in NSCLC. (a) Patient samples with high ATF4, PHGDH, PSAT1 or SHMT2 mRNA expression (Z-score >2) have elevated NRF2 protein expression. (b) Kaplan-Meier survival analysis of patients from TCGA with a high (red) or low (blue) expression of PHGDH, PSAT1 and SHMT2. The p-value was calculated using the Mantel-Cox test. (c-d) Association of tumour stage (c) and primary tumour pathological spread (d) associated with PHGDH, PSAT1 and SHMT2 expression. The p-value was calculated using the Chi-square test.

Supplementary Table 1: Gene expression correlations with 13C- serine and glycine labelling at 6 and 24 hours

| Serine 6hr |              |         | Serine 24hr |              |         | Glycine 6hr |              |         | Glycine 24hr |              |         |
|------------|--------------|---------|-------------|--------------|---------|-------------|--------------|---------|--------------|--------------|---------|
| Rank       | Gene         | Pearson | Rank        | Gene         | Pearson | Rank        | Gene         | Pearson | Rank         | Gene         | Pearson |
| 1          | LOC100128361 | 0.605   | 1           | APOO         | 0.545   | 1           | LOC100128361 | 0.501   | 1            | PHGDH        | 0.531   |
| 2          | PHGDH        | 0.562   | 2           | CENPJ        | 0.527   | 2           | NUDT10       | 0.501   | 2            | TCEB2        | 0.486   |
| 3          | TCEB2        | 0.554   | 3           | PHGDH        | 0.525   | 3           | KLHL14       | 0.496   | 3            | MAPK10       | 0.465   |
| 4          | LEO1         | 0.519   | 4           | NIPSNAP3A    | 0.508   | 4           | ROR2         | 0.491   | 4            | LEO1         | 0.460   |
| 5          | EGFL6        | 0.508   | 5           | LEO1         | 0.506   | 5           | DLK1         | 0.488   | 5            | KBTBD6       | 0.457   |
| 6          | CENPJ        | 0.500   | 6           | LSM14A       | 0.504   | 6           | CD1D         | 0.484   | 6            | CENPJ        | 0.450   |
| 7          | EIF2S2       | 0.487   | 7           | POLA1        | 0.504   | 7           | LOC100507043 | 0.484   | 7            | LOC100128361 | 0.438   |
| 8          | NFE2L2       | 0.482   | 8           | KBTBD6       | 0.503   | 8           | MAPK10       | 0.482   | 8            | KBTBD7       | 0.427   |
| 9          | FANCC        | 0.474   | 9           | KIF11        | 0.501   | 9           | ZBTB8B       | 0.475   | 9            | PAQR4        | 0.427   |
| 10         | RHBDL3       | 0.463   | 10          | FANCC        | 0.500   | 10          | RUNDC3B      | 0.469   | 10           | C20orf112    | 0.423   |
| 11         | MAPK10       | 0.459   | 11          | NUP133       | 0.499   | 11          | TBC1D24      | 0.468   | 11           | ZNF768       | 0.421   |
| 12         | KBTBD6       | 0.443   | 12          | KIAA1841     | 0.494   | 12          | ZCCHC12      | 0.465   | 12           | MAS1L        | 0.417   |
| 13         | PPIA         | 0.443   | 13          | TCEB2        | 0.493   | 13          | D4S234E      | 0.465   | 13           | EPHX1        | 0.416   |
| 14         | XPA          | 0.439   | 14          | COL5A2       | 0.492   | 14          | 40058        | 0.458   | 14           | EGFL6        | 0.415   |
| 15         | CAMSAP2      | 0.439   | 15          | PHF16        | 0.479   | 15          | BTN1A1       | 0.454   | 15           | LOC100506995 | 0.415   |
| 16         | C3orf25      | 0.434   | 16          | HSD17B10     | 0.474   | 16          | PPM1E        | 0.453   | 16           | MED4         | 0.415   |
| 17         | EPHX1        | 0.433   | 17          | C1orf124     | 0.468   | 17          | PRL          | 0.453   | 17           | PPIA         | 0.413   |
| 18         | NUP133       | 0.431   | 18          | GSTA4        | 0.466   | 18          | HOTAIR       | 0.451   | 18           | SRGAP3       | 0.412   |
| 19         | C16orf59     | 0.426   | 19          | TIMM23       | 0.466   | 19          | ATCAY        | 0.450   | 19           | AIMP2        | 0.407   |
| 20         | GGCT         | 0.426   | 20          | ZNF566       | 0.464   | 20          | PPIA         | 0.444   | 20           | FANCC        | 0.407   |
| 21         | FAM8A1       | 0.425   | 21          | DDX46        | 0.463   | 21          | CPA1         | 0.444   | 21           | COL3A1       | 0.406   |
| 22         | RNF20        | 0.425   | 22          | KCMF1        | 0.463   | 22          | CDK13        | 0.443   | 22           | EIF2S2       | 0.406   |
| 23         | HIST1H3F     | 0.424   | 23          | NDUFA1       | 0.462   | 23          | TCEB2        | 0.442   | 23           | USP7         | 0.402   |
| 24         | POLA1        | 0.423   | 24          | EIF2S2       | 0.460   | 24          | PHGDH        | 0.441   | 24           | LRRCS57      | 0.402   |
| 25         | NIPSNAP3A    | 0.421   | 25          | RHBDL3       | 0.458   | 25          | PAQR4        | 0.441   | 25           | LPAR6        | 0.401   |
| 26         | SNRPE        | 0.421   | 26          | SLC47A1      | 0.458   | 26          | SNRPE        | 0.436   | 26           | SUCLA2       | 0.399   |
| 27         | LOC100507043 | 0.419   | 27          | HIBCH        | 0.457   | 27          | C15orf59     | 0.434   | 27           | SLC43A2      | 0.396   |
| 28         | C1orf131     | 0.419   | 28          | COX7B        | 0.456   | 28          | NSD1         | 0.432   | 28           | C1QB         | 0.396   |
| 29         | C19orf76     | 0.416   | 29          | MAS1L        | 0.453   | 29          | FAM8A1       | 0.429   | 29           | D2HGDH       | 0.394   |
| 30         | ENAH         | 0.416   | 30          | RIOK1        | 0.453   | 30          | LOC150622    | 0.428   | 30           | PIK3C2B      | 0.393   |
| 31         | PAQR4        | 0.416   | 31          | SIX3         | 0.452   | 31          | RGS12        | 0.428   | 31           | C1orf131     | 0.390   |
| 32         | PASK         | 0.413   | 32          | LIN9         | 0.451   | 32          | GPR61        | 0.423   | 32           | NHSL1        | 0.389   |
| 33         | PHTF2        | 0.411   | 33          | SUCLA2       | 0.450   | 33          | CBLN2        | 0.422   | 33           | COL5A2       | 0.388   |
| 34         | CBLN2        | 0.410   | 34          | GSTM4        | 0.446   | 34          | CUL3         | 0.420   | 34           | LOC100132735 | 0.386   |
| 35         | PHF8         | 0.409   | 35          | DNAJB7       | 0.446   | 35          | DSCR6        | 0.417   | 35           | XPA          | 0.385   |
| 36         | TBC1D7       | 0.408   | 36          | MLLT11       | 0.445   | 36          | POLA1        | 0.417   | 36           | BTG2         | 0.384   |
| 37         | ECI1         | 0.408   | 37          | CBLN2        | 0.445   | 37          | EFCAB1       | 0.416   | 37           | PNMT         | 0.383   |
| 38         | USP7         | 0.408   | 38          | CUL3         | 0.444   | 38          | LOC643201    | 0.416   | 38           | RNF20        | 0.383   |
| 39         | NHSL1        | 0.406   | 39          | C16orf59     | 0.442   | 39          | KBTBD2       | 0.415   | 39           | IGFBP2       | 0.381   |
| 40         | CROT         | 0.406   | 40          | HDHC2        | 0.441   | 40          | MIR600HG     | 0.415   | 40           | PASK         | 0.379   |
| 41         | RFXAP        | 0.405   | 41          | ENAH         | 0.441   | 41          | LOC283547    | 0.415   | 41           | GGCT         | 0.379   |
| 42         | PGD          | 0.405   | 42          | PIR          | 0.441   | 42          | ITGB1BP2     | 0.414   | 42           | PHF16        | 0.377   |
| 43         | MAS1L        | 0.405   | 43          | LOC100128361 | 0.440   | 43          | DYNLT1       | 0.413   | 43           | MMP19        | 0.377   |
| 44         | IRAK1BP1     | 0.404   | 44          | TIMM21       | 0.438   | 44          | C3orf25      | 0.413   | 44           | SKP2         | 0.376   |
| 45         | SUCLA2       | 0.403   | 45          | ALDH1A1      | 0.435   | 45          | HOXA10       | 0.411   | 45           | ECI1         | 0.375   |
| 46         | TDP2         | 0.400   | 46          | MED4         | 0.435   | 46          | ECI1         | 0.408   | 46           | NAA60        | 0.375   |
| 47         | LOC283547    | 0.398   | 47          | TDP2         | 0.434   | 47          | KIAA2022     | 0.408   | 47           | LOC100506597 | 0.374   |
| 48         | STRBP        | 0.397   | 48          | TBCE         | 0.434   | 48          | SLC7A3       | 0.408   | 48           | ARID1B       | 0.372   |
| 49         | CUL3         | 0.397   | 49          | TAF9B        | 0.433   | 49          | EGFL6        | 0.406   | 49           | PHF8         | 0.372   |
| 50         | IPO9         | 0.397   | 50          | RHEB         | 0.431   | 50          | C9orf16      | 0.404   | 50           | LSM14A       | 0.371   |
| 51         | DDX46        | 0.396   | 51          | COL3A1       | 0.430   | 51          | LOC100506530 | 0.403   | 51           | PSMA2        | 0.371   |

|     |          |       |     |              |       |     |               |       |     |           |       |
|-----|----------|-------|-----|--------------|-------|-----|---------------|-------|-----|-----------|-------|
| 52  | PNMT     | 0.396 | 52  | HAUS1        | 0.429 | 52  | ATRN1         | 0.403 | 52  | FLJ34503  | 0.371 |
| 53  | RBMX     | 0.395 | 53  | CCDC90A      | 0.428 | 53  | EIF2AK1       | 0.402 | 53  | C16orf59  | 0.369 |
| 54  | LSM14A   | 0.394 | 54  | C14orf142    | 0.427 | 54  | LEO1          | 0.402 | 54  | LOC283688 | 0.368 |
| 55  | UBE2L3   | 0.394 | 55  | PEG3-AS1     | 0.427 | 55  | SOWAHA        | 0.401 | 55  | SARM1     | 0.368 |
| 56  | MED4     | 0.394 | 56  | UBE2L3       | 0.425 | 56  | KIAA0146      | 0.401 | 56  | ALDH1A1   | 0.368 |
| 57  | RPS27A   | 0.393 | 57  | LOC100132735 | 0.425 | 57  | HADH          | 0.401 | 57  | ARHGAP35  | 0.368 |
| 58  | NFIA     | 0.393 | 58  | FECH         | 0.424 | 58  | FRMPD3        | 0.401 | 58  | LOC283547 | 0.368 |
| 59  | YWHAG    | 0.393 | 59  | CCDC34       | 0.423 | 59  | LOC100134361  | 0.399 | 59  | PURB      | 0.367 |
| 60  | DLGAP1   | 0.392 | 60  | USP7         | 0.422 | 60  | DKFZP586I1420 | 0.399 | 60  | CUL3      | 0.367 |
| 61  | GTF2A2   | 0.391 | 61  | TCP1         | 0.422 | 61  | GGCT          | 0.397 | 61  | C9orf125  | 0.366 |
| 62  | MRS2     | 0.391 | 62  | LOC100507486 | 0.421 | 62  | HPCA          | 0.395 | 62  | SAP18     | 0.366 |
| 63  | EEF1A1   | 0.391 | 63  | ING5         | 0.420 | 63  | NASP          | 0.395 | 63  | PPARGC1B  | 0.365 |
| 64  | C9orf125 | 0.391 | 64  | FAM8A1       | 0.419 | 64  | SNX13         | 0.395 | 64  | RFX7      | 0.362 |
| 65  | FLJ34503 | 0.391 | 65  | EIF1AX       | 0.419 | 65  | PASK          | 0.394 | 65  | UBE2L3    | 0.362 |
| 66  | KBTBD7   | 0.387 | 66  | HAUS7        | 0.418 | 66  | TCEAL2        | 0.393 | 66  | PGD       | 0.361 |
| 67  | KLRD1    | 0.387 | 67  | RNGTT        | 0.417 | 67  | STRBP         | 0.391 | 67  | OSR2      | 0.361 |
| 68  | SKP2     | 0.387 | 68  | PDHA1        | 0.416 | 68  | CENPJ         | 0.391 | 68  | TRAF7     | 0.360 |
| 69  | PA2G4    | 0.387 | 69  | RNF20        | 0.416 | 69  | ZNF513        | 0.390 | 69  | FAM53B    | 0.360 |
| 70  | KRT5     | 0.385 | 70  | IKBKAP       | 0.416 | 70  | HOXA11        | 0.390 | 70  | RFXAP     | 0.360 |
| 71  | ALDH3A1  | 0.385 | 71  | KLHL15       | 0.416 | 71  | LOC100506597  | 0.389 | 71  | HOXA11    | 0.360 |
| 72  | COX5A    | 0.384 | 72  | IREB2        | 0.415 | 72  | SLC18A3       | 0.388 | 72  | PIR       | 0.359 |
| 73  | UBQLN2   | 0.383 | 73  | LIG1         | 0.414 | 73  | MPHOSPH8      | 0.388 | 73  | RCBTB1    | 0.359 |
| 74  | GMNN     | 0.383 | 74  | DLX1         | 0.413 | 74  | RAB26         | 0.386 | 74  | NIPSNAP3A | 0.359 |
| 75  | FECH     | 0.383 | 75  | GTF2A2       | 0.413 | 75  | BGN           | 0.386 | 75  | CIC       | 0.358 |
| 76  | YAE1D1   | 0.382 | 76  | OIP5         | 0.411 | 76  | PHF8          | 0.385 | 76  | SULF2     | 0.358 |
| 77  | BTG2     | 0.381 | 77  | C15orf59     | 0.411 | 77  | LOC100506995  | 0.381 | 77  | MYBL2     | 0.357 |
| 78  | LRRC57   | 0.380 | 78  | RP2          | 0.411 | 78  | CHRNA3        | 0.380 | 78  | SEPHS1    | 0.357 |
| 79  | SMC1A    | 0.380 | 79  | JAM3         | 0.411 | 79  | CHST1         | 0.380 | 79  | KLRD1     | 0.357 |
| 80  | PSMA2    | 0.379 | 80  | EIF3K        | 0.410 | 80  | RMST          | 0.379 | 80  | SKP1      | 0.355 |
| 81  | GALNTL1  | 0.378 | 81  | NDUFS1       | 0.409 | 81  | SH2B1         | 0.379 | 81  | TMEM97    | 0.355 |
| 82  | HSD17B10 | 0.377 | 82  | PHTF2        | 0.409 | 82  | SLC27A3       | 0.378 | 82  | CYBASC3   | 0.354 |
| 83  | CAMKK1   | 0.377 | 83  | ASF1A        | 0.407 | 83  | TAS1R1        | 0.378 | 83  | GMNN      | 0.354 |
| 84  | DNAJB7   | 0.376 | 84  | MAGOHB       | 0.407 | 84  | GRIPAP1       | 0.377 | 84  | HIST1H3D  | 0.353 |
| 85  | FBN2     | 0.376 | 85  | PA2G4        | 0.406 | 85  | TCF20         | 0.377 | 85  | UTP14C    | 0.352 |
| 86  | MRAP2    | 0.375 | 86  | PSMG1        | 0.406 | 86  | SCN4B         | 0.377 | 86  | NDUFA10   | 0.352 |
| 87  | HOXB13   | 0.375 | 87  | SIRT1        | 0.405 | 87  | FAM123A       | 0.376 | 87  | YAE1D1    | 0.351 |
| 88  | ITGB1BP2 | 0.375 | 88  | CDK8         | 0.405 | 88  | PRAC          | 0.375 | 88  | PTCH1     | 0.351 |
| 89  | KIF11    | 0.375 | 89  | PEG3         | 0.405 | 89  | RBM8A         | 0.374 | 89  | C16orf54  | 0.350 |
| 90  | AIMP2    | 0.374 | 90  | TBC1D7       | 0.405 | 90  | ATP8A2        | 0.374 | 90  | POLA1     | 0.350 |
| 91  | PIR      | 0.374 | 91  | TMEM237      | 0.405 | 91  | LAG3          | 0.373 | 91  | NUP133    | 0.350 |
| 92  | TBC1D24  | 0.374 | 92  | HTATSF1      | 0.404 | 92  | LOC100507194  | 0.372 | 92  | TAS2R41   | 0.349 |
| 93  | SOSTDC1  | 0.374 | 93  | NR0B1        | 0.404 | 93  | HNRNPA3       | 0.372 | 93  | SOX12     | 0.349 |
| 94  | IGFBP2   | 0.373 | 94  | TPMT         | 0.403 | 94  | PPP1R16B      | 0.372 | 94  | MGC16025  | 0.349 |
| 95  | ATRN1    | 0.372 | 95  | DZIP1        | 0.403 | 95  | SHF           | 0.371 | 95  | DLX1      | 0.348 |
| 96  | JAM3     | 0.372 | 96  | POMP         | 0.402 | 96  | KHK           | 0.371 | 96  | C3orf25   | 0.348 |
| 97  | CCDC90A  | 0.372 | 97  | TCF12        | 0.401 | 97  | EIF2S2        | 0.370 | 97  | ABCC5     | 0.347 |
| 98  | IQCA1    | 0.371 | 98  | SHPRH        | 0.401 | 98  | DNASE1L2      | 0.370 | 98  | HIST1H3F  | 0.347 |
| 99  | ASF1A    | 0.370 | 99  | MTERFD3      | 0.400 | 99  | BRD3          | 0.369 | 99  | AKR1C2    | 0.347 |
| 100 | PRL      | 0.368 | 100 | C19orf40     | 0.400 | 100 | SEC31B        | 0.369 | 100 | SOX2      | 0.346 |
| 101 | ING5     | 0.368 | 101 | SPHAR        | 0.400 | 101 | ING5          | 0.369 | 101 | TBC1D7    | 0.346 |
| 102 | OLA1     | 0.368 | 102 | ID2          | 0.399 | 102 | C1orf173      | 0.369 | 102 | HFE2      | 0.346 |
| 103 | IREB2    | 0.368 | 103 | SLC25A14     | 0.398 | 103 | RFXAP         | 0.368 | 103 | RNF114    | 0.345 |
| 104 | SLC25A14 | 0.367 | 104 | C5orf44      | 0.398 | 104 | CHRN4         | 0.368 | 104 | PKD1      | 0.344 |
| 105 | RNGTT    | 0.367 | 105 | APOOL        | 0.398 | 105 | C1QA          | 0.366 | 105 | ALG1      | 0.342 |



|     |              |       |     |              |       |     |              |       |     |              |       |
|-----|--------------|-------|-----|--------------|-------|-----|--------------|-------|-----|--------------|-------|
| 106 | AKR1C1       | 0.367 | 106 | C21orf128    | 0.398 | 106 | NRXN2        | 0.366 | 106 | KRT5         | 0.341 |
| 107 | C20orf112    | 0.367 | 107 | UBR3         | 0.397 | 107 | LYSMD4       | 0.365 | 107 | TAF11        | 0.341 |
| 108 | C1QB         | 0.366 | 108 | EXO1         | 0.397 | 108 | PDZD4        | 0.365 | 108 | HOXA10       | 0.341 |
| 109 | PSMC2        | 0.366 | 109 | CCAR1        | 0.397 | 109 | ZSCAN29      | 0.364 | 109 | ZSCAN29      | 0.341 |
| 110 | LOC83954     | 0.366 | 110 | C1orf131     | 0.396 | 110 | NDUFA4       | 0.364 | 110 | PRPF38A      | 0.340 |
| 111 | MIR600HG     | 0.366 | 111 | SOX12        | 0.396 | 111 | NT5M         | 0.364 | 111 | OPA1         | 0.340 |
| 112 | ANKRD16      | 0.366 | 112 | GLI1         | 0.396 | 112 | ZIC3         | 0.364 | 112 | BRD3         | 0.339 |
| 113 | LOC283688    | 0.364 | 113 | ANKRD16      | 0.395 | 113 | RHBDL3       | 0.364 | 113 | FAM215A      | 0.339 |
| 114 | SOHLH1       | 0.364 | 114 | FH           | 0.395 | 114 | SLC25A14     | 0.362 | 114 | PEG3-AS1     | 0.339 |
| 115 | LIG1         | 0.364 | 115 | ABCB10       | 0.395 | 115 | FGF7         | 0.362 | 115 | IREB2        | 0.338 |
| 116 | CCBL1        | 0.364 | 116 | EMID2        | 0.395 | 116 | CRMP1        | 0.362 | 116 | DNAJB7       | 0.338 |
| 117 | TCP1         | 0.364 | 117 | RBM17        | 0.395 | 117 | ROGDI        | 0.361 | 117 | UNC5B        | 0.338 |
| 118 | NTRK2        | 0.363 | 118 | UCHL1        | 0.394 | 118 | C16orf59     | 0.361 | 118 | GATA2        | 0.338 |
| 119 | C11orf53     | 0.363 | 119 | LOC100506935 | 0.393 | 119 | TMEM107      | 0.360 | 119 | ING5         | 0.338 |
| 120 | CHRNA5       | 0.363 | 120 | IFT88        | 0.393 | 120 | GATA4        | 0.360 | 120 | ENAH         | 0.337 |
| 121 | MAGOHB       | 0.362 | 121 | EXOSC3       | 0.393 | 121 | NFIA         | 0.360 | 121 | TBC1D24      | 0.336 |
| 122 | RBM34        | 0.361 | 122 | IER3IP1      | 0.392 | 122 | LOC100506388 | 0.358 | 122 | AKR1C1       | 0.336 |
| 123 | ROR2         | 0.360 | 123 | NUP160       | 0.392 | 123 | TNRC6B       | 0.358 | 123 | RBM17        | 0.335 |
| 124 | RFX7         | 0.360 | 124 | PSMA2        | 0.391 | 124 | WNK3         | 0.358 | 124 | GNG4         | 0.335 |
| 125 | CD1D         | 0.359 | 125 | IPO9         | 0.391 | 125 | BTNL9        | 0.357 | 125 | CDCA7        | 0.334 |
| 126 | LPAR6        | 0.359 | 126 | NFYB         | 0.391 | 126 | ANKS6        | 0.357 | 126 | KIF11        | 0.334 |
| 127 | LOC100506935 | 0.359 | 127 | SEPHS1       | 0.391 | 127 | NFE2L2       | 0.357 | 127 | RELL2        | 0.334 |
| 128 | SKP1         | 0.359 | 128 | PASK         | 0.391 | 128 | ZZEF1        | 0.357 | 128 | VPS39        | 0.334 |
| 129 | CMTM5        | 0.358 | 129 | ITGB1BP2     | 0.390 | 129 | PHF16        | 0.356 | 129 | DLGAP1       | 0.333 |
| 130 | ZSCAN29      | 0.357 | 130 | ATP5G3       | 0.390 | 130 | IRAK1BP1     | 0.356 | 130 | HTATSF1      | 0.333 |
| 131 | LIN9         | 0.356 | 131 | PRL          | 0.390 | 131 | ZBTB34       | 0.355 | 131 | STRBP        | 0.333 |
| 132 | DENND2C      | 0.356 | 132 | BRP44        | 0.390 | 132 | SIX6         | 0.355 | 132 | LIG1         | 0.333 |
| 133 | HOXA10       | 0.356 | 133 | XPA          | 0.389 | 133 | MAK          | 0.354 | 133 | BCL9         | 0.332 |
| 134 | RNF187       | 0.356 | 134 | NFIA         | 0.389 | 134 | BTG2         | 0.354 | 134 | PIK3R1       | 0.332 |
| 135 | OIP5         | 0.355 | 135 | TOR3A        | 0.389 | 135 | HOXB13       | 0.354 | 135 | FOLH1        | 0.332 |
| 136 | TAF11        | 0.355 | 136 | LOC149086    | 0.389 | 136 | SENP7        | 0.353 | 136 | RAI1         | 0.331 |
| 137 | MYCBP2       | 0.354 | 137 | SARM1        | 0.388 | 137 | LOC83954     | 0.352 | 137 | LOC100506935 | 0.331 |
| 138 | IKBKAP       | 0.354 | 138 | SMC1A        | 0.388 | 138 | ODZ3         | 0.352 | 138 | NUP210P1     | 0.331 |
| 139 | MRPL30       | 0.354 | 139 | FGD1         | 0.387 | 139 | TRO          | 0.352 | 139 | TUFM         | 0.331 |
| 140 | CDCA7        | 0.353 | 140 | RFXAP        | 0.387 | 140 | FANCC        | 0.351 | 140 | HDLBP        | 0.331 |
| 141 | KIAA0319     | 0.353 | 141 | EPB41L5      | 0.387 | 141 | COL2A1       | 0.350 | 141 | LINC00479    | 0.329 |
| 142 | MRPL44       | 0.352 | 142 | UBA2         | 0.387 | 142 | TLX1         | 0.350 | 142 | SOHLH1       | 0.329 |
| 143 | UHRF1BP1     | 0.352 | 143 | SRSF1        | 0.386 | 143 | PABPC5       | 0.350 | 143 | ALDH3A2      | 0.329 |
| 144 | NASP         | 0.352 | 144 | SNRPE        | 0.386 | 144 | CITED1       | 0.350 | 144 | 39872        | 0.329 |
| 145 | NROB1        | 0.351 | 145 | CCBL1        | 0.385 | 145 | SOHLH1       | 0.349 | 145 | IGFBP5       | 0.329 |
| 146 | PSAT1        | 0.351 | 146 | SNX12        | 0.385 | 146 | ING3         | 0.349 | 146 | TDP2         | 0.328 |
| 147 | RNPS1        | 0.351 | 147 | MAP1A        | 0.385 | 147 | ZNF768       | 0.349 | 147 | IRAK1BP1     | 0.328 |
| 148 | CRMP1        | 0.351 | 148 | AFG3L2       | 0.385 | 148 | PSMA2        | 0.348 | 148 | IQCA1        | 0.328 |
| 149 | PCNA         | 0.351 | 149 | GAS7         | 0.385 | 149 | ZNF460       | 0.347 | 149 | MPLKIP       | 0.328 |
| 150 | COX7B        | 0.350 | 150 | GSG2         | 0.384 | 150 | CCP110       | 0.347 | 150 | CBLN2        | 0.328 |
| 151 | C1orf111     | 0.350 | 151 | SEMA6D       | 0.384 | 151 | CHRM4        | 0.347 | 151 | SKA3         | 0.326 |
| 152 | HDLBP        | 0.350 | 152 | EEF1A1       | 0.384 | 152 | LOC100507739 | 0.347 | 152 | GSTM4        | 0.326 |
| 153 | KCNS2        | 0.349 | 153 | NDUFA6       | 0.383 | 153 | PHTF2        | 0.346 | 153 | SLC35A4      | 0.325 |
| 154 | OPN1SW       | 0.349 | 154 | SKP2         | 0.383 | 154 | PKNOX1       | 0.346 | 154 | DSCC1        | 0.325 |
| 155 | AKR1C2       | 0.349 | 155 | CMTM5        | 0.381 | 155 | FBXW2        | 0.346 | 155 | INTS6-AS1    | 0.324 |
| 156 | HR           | 0.349 | 156 | SCARA5       | 0.381 | 156 | GTF2IRD1     | 0.345 | 156 | CMTM5        | 0.324 |
| 157 | MGC16025     | 0.348 | 157 | HIST1H3F     | 0.380 | 157 | FGF12        | 0.345 | 157 | COX5A        | 0.324 |
| 158 | HDCC2        | 0.348 | 158 | RPS27A       | 0.380 | 158 | AP3B2        | 0.344 | 158 | GTF2IRD1     | 0.323 |
| 159 | RNASEH1      | 0.348 | 159 | C9orf125     | 0.379 | 159 | NFATC2IP     | 0.344 | 159 | C1orf129     | 0.323 |

|     |              |       |     |           |       |     |            |       |     |          |       |
|-----|--------------|-------|-----|-----------|-------|-----|------------|-------|-----|----------|-------|
| 160 | ILKAP        | 0.348 | 160 | PGD       | 0.379 | 160 | SYBU       | 0.343 | 160 | ANKRD13B | 0.322 |
| 161 | SHPRH        | 0.348 | 161 | RAB11FIP2 | 0.379 | 161 | IGFBP2     | 0.343 | 161 | POLR1D   | 0.322 |
| 162 | EHMT1        | 0.347 | 162 | HNRNPA0   | 0.379 | 162 | PABPC1L    | 0.342 | 162 | HNRNPA0  | 0.322 |
| 163 | DYNLL1       | 0.346 | 163 | ZNF271    | 0.379 | 163 | CNOT6      | 0.342 | 163 | MRS2     | 0.322 |
| 164 | ATRX         | 0.345 | 164 | HOXB13    | 0.378 | 164 | TAGAP      | 0.342 | 164 | DYNLL1   | 0.321 |
| 165 | GAL3ST2      | 0.345 | 165 | CHUK      | 0.378 | 165 | SRRM2      | 0.342 | 165 | DDX46    | 0.321 |
| 166 | WDR76        | 0.344 | 166 | RCBTB1    | 0.378 | 166 | ZNF821     | 0.341 | 166 | FRAT2    | 0.321 |
| 167 | MLST8        | 0.344 | 167 | KIAA1586  | 0.378 | 167 | C19orf76   | 0.341 | 167 | PDS5B    | 0.321 |
| 168 | LMNB1        | 0.344 | 168 | ZNF507    | 0.377 | 168 | OLA1       | 0.341 | 168 | ZCCHC3   | 0.321 |
| 169 | HIST1H3G     | 0.343 | 169 | OLA1      | 0.377 | 169 | GAS8       | 0.341 | 169 | HR       | 0.320 |
| 170 | KLHL14       | 0.343 | 170 | MFF       | 0.377 | 170 | LUC7L2     | 0.341 | 170 | SYBU     | 0.320 |
| 171 | SIX3         | 0.343 | 171 | DNA2      | 0.376 | 171 | PRR14L     | 0.341 | 171 | SLC29A3  | 0.320 |
| 172 | PHF16        | 0.343 | 172 | ZNF192    | 0.376 | 172 | GNL1       | 0.340 | 172 | C9orf16  | 0.320 |
| 173 | IAPP         | 0.343 | 173 | IPO7      | 0.376 | 173 | H2AFV      | 0.340 | 173 | TUBB2B   | 0.319 |
| 174 | ZCCHC10      | 0.342 | 174 | TIMM17A   | 0.376 | 174 | CXCR4      | 0.339 | 174 | TRIL     | 0.319 |
| 175 | BEX1         | 0.342 | 175 | DTL       | 0.375 | 175 | FAM172A    | 0.339 | 175 | TRIM26   | 0.319 |
| 176 | GSTA4        | 0.342 | 176 | DSTYK     | 0.375 | 176 | HDAC10     | 0.339 | 176 | SOSTDC1  | 0.319 |
| 177 | KIAA0101     | 0.342 | 177 | WDR76     | 0.375 | 177 | MEGF11     | 0.339 | 177 | HSD17B10 | 0.319 |
| 178 | TMEM237      | 0.342 | 178 | NXT2      | 0.375 | 178 | NIPSNAP3A  | 0.339 | 178 | PTPLAD1  | 0.318 |
| 179 | ANP32B       | 0.342 | 179 | TSNAX     | 0.375 | 179 | PRPH       | 0.338 | 179 | REV1     | 0.318 |
| 180 | ZNF192       | 0.341 | 180 | GIP       | 0.375 | 180 | DPY19L2P3  | 0.338 | 180 | TTF2     | 0.317 |
| 181 | SAP18        | 0.341 | 181 | TRAPPC2   | 0.375 | 181 | LDB3       | 0.337 | 181 | CYP4F12  | 0.317 |
| 182 | COL5A2       | 0.341 | 182 | LOC647946 | 0.374 | 182 | TXN2       | 0.337 | 182 | MAGEF1   | 0.317 |
| 183 | PAFAH1B3     | 0.341 | 183 | ATP5A1    | 0.374 | 183 | HDAC4      | 0.336 | 183 | POLD2    | 0.317 |
| 184 | SEMA3F       | 0.341 | 184 | BTNL9     | 0.373 | 184 | ZNF346     | 0.336 | 184 | PIGX     | 0.317 |
| 185 | RNASEH2B     | 0.341 | 185 | DLGAP1    | 0.373 | 185 | PRKDC      | 0.336 | 185 | NT5C3    | 0.317 |
| 186 | MARK1        | 0.341 | 186 | RPS16     | 0.373 | 186 | GABRG3     | 0.335 | 186 | NFE2L2   | 0.316 |
| 187 | MRPS31       | 0.341 | 187 | EPHX1     | 0.373 | 187 | ZNF662     | 0.335 | 187 | NUDT15   | 0.316 |
| 188 | PTCH1        | 0.341 | 188 | MRPL30    | 0.373 | 188 | KBTBD6     | 0.335 | 188 | SLC6A8   | 0.316 |
| 189 | FGF12        | 0.341 | 189 | GMNN      | 0.372 | 189 | RNF187     | 0.335 | 189 | TRAF3IP1 | 0.316 |
| 190 | MAPKBP1      | 0.340 | 190 | ATP5J     | 0.372 | 190 | LOC157627  | 0.335 | 190 | TCP1     | 0.316 |
| 191 | REV1         | 0.340 | 191 | NRG2      | 0.372 | 191 | HADHA      | 0.335 | 191 | KIF22    | 0.315 |
| 192 | TAF9B        | 0.339 | 192 | LYRM7     | 0.370 | 192 | ERP44      | 0.334 | 192 | HIBCH    | 0.315 |
| 193 | TPMT         | 0.339 | 193 | TDRD3     | 0.370 | 193 | GPRIN1     | 0.334 | 193 | CLDN8    | 0.314 |
| 194 | NAA60        | 0.338 | 194 | MRS2      | 0.370 | 194 | CDK5       | 0.334 | 194 | CYCS     | 0.314 |
| 195 | RCBTB1       | 0.338 | 195 | C1orf31   | 0.369 | 195 | KBTBD7     | 0.334 | 195 | HADH     | 0.313 |
| 196 | ANKRD13B     | 0.338 | 196 | NARS      | 0.369 | 196 | EPHA5      | 0.334 | 196 | CDK8     | 0.313 |
| 197 | CELA3A       | 0.338 | 197 | MSL3      | 0.368 | 197 | TMEM132C   | 0.333 | 197 | SEMA3F   | 0.313 |
| 198 | ERP44        | 0.338 | 198 | SMC2      | 0.368 | 198 | SPIRE2     | 0.333 | 198 | MADD     | 0.312 |
| 199 | SOX12        | 0.338 | 199 | ALMS1     | 0.367 | 199 | CUX1       | 0.333 | 199 | SEMA6D   | 0.312 |
| 200 | C1orf31      | 0.338 | 200 | KIF14     | 0.367 | 200 | CDKN2B-AS1 | 0.333 | 200 | CCDC34   | 0.312 |
| 201 | COL3A1       | 0.337 | 201 | ZNF324B   | 0.367 | 201 | HUWE1      | 0.333 | 201 | ZCCHC10  | 0.312 |
| 202 | SESTD1       | 0.337 | 202 | IDE       | 0.367 | 202 | CCDC136    | 0.333 | 202 | MSX2     | 0.312 |
| 203 | HNRNPA3      | 0.337 | 203 | SAP18     | 0.367 | 203 | ZNF48      | 0.332 | 203 | RNF187   | 0.312 |
| 204 | PPM1E        | 0.337 | 204 | TSHZ1     | 0.366 | 204 | ATPIF1     | 0.332 | 204 | DDX49    | 0.312 |
| 205 | WASF1        | 0.336 | 205 | GBX2      | 0.366 | 205 | CHN2       | 0.332 | 205 | ENDOG    | 0.312 |
| 206 | HIST1H3D     | 0.336 | 206 | DMXL1     | 0.366 | 206 | RAPGEF4    | 0.331 | 206 | SLC4A11  | 0.311 |
| 207 | LOC100132735 | 0.336 | 207 | ISLR2     | 0.366 | 207 | PPIP5K1    | 0.331 | 207 | RPS27A   | 0.310 |
| 208 | GSTM3        | 0.336 | 208 | RNF138    | 0.365 | 208 | DLX4       | 0.331 | 208 | PRR15    | 0.310 |
| 209 | LINC00487    | 0.336 | 209 | C14orf162 | 0.365 | 209 | MGC45800   | 0.331 | 209 | PNKD     | 0.310 |
| 210 | TP53AIP1     | 0.336 | 210 | PGBD1     | 0.364 | 210 | AIF1L      | 0.330 | 210 | C19orf76 | 0.310 |
| 211 | ZCCHC12      | 0.335 | 211 | CABYR     | 0.363 | 211 | PEX6       | 0.330 | 211 | PIGS     | 0.310 |
| 212 | HIBCH        | 0.335 | 212 | FAM104B   | 0.363 | 212 | D2HGDH     | 0.330 | 212 | GAL3ST2  | 0.309 |
| 213 | C9orf16      | 0.335 | 213 | CCP110    | 0.362 | 213 | RALA       | 0.330 | 213 | TOP1MT   | 0.309 |

|     |          |       |     |              |       |     |              |       |     |              |       |
|-----|----------|-------|-----|--------------|-------|-----|--------------|-------|-----|--------------|-------|
| 214 | AQP10    | 0.335 | 214 | LOC255352    | 0.362 | 214 | UHRF1BP1     | 0.330 | 214 | WFDC9        | 0.309 |
| 215 | TIMM23   | 0.334 | 215 | TSN          | 0.362 | 215 | LOC100288152 | 0.330 | 215 | ILKAP        | 0.309 |
| 216 | EIF3J    | 0.334 | 216 | R3HDM1       | 0.362 | 216 | MPLKIP       | 0.329 | 216 | GSTA4        | 0.309 |
| 217 | PNKD     | 0.334 | 217 | CTPS         | 0.361 | 217 | YWHAG        | 0.329 | 217 | DYNLT1       | 0.309 |
| 218 | HOXA11   | 0.334 | 218 | DHX9         | 0.361 | 218 | PTPN18       | 0.329 | 218 | EMID2        | 0.309 |
| 219 | TMEM97   | 0.334 | 219 | PDE3B        | 0.361 | 219 | SDK1         | 0.329 | 219 | ELFN1        | 0.308 |
| 220 | DHRS11   | 0.333 | 220 | EID2         | 0.360 | 220 | WDR76        | 0.329 | 220 | SULF1        | 0.308 |
| 221 | CDK8     | 0.333 | 221 | POP4         | 0.360 | 221 | TULP4        | 0.328 | 221 | LCMT2        | 0.308 |
| 222 | RNFT2    | 0.333 | 222 | NEFH         | 0.360 | 222 | RNPS1        | 0.328 | 222 | SESTD1       | 0.308 |
| 223 | NUDT10   | 0.333 | 223 | MEGF11       | 0.359 | 223 | GNG4         | 0.328 | 223 | SPNS1        | 0.308 |
| 224 | ANP32A   | 0.333 | 224 | LSM2         | 0.359 | 224 | E2F2         | 0.327 | 224 | CHGB         | 0.308 |
| 225 | DYNLT1   | 0.333 | 225 | CCDC138      | 0.359 | 225 | TCF24        | 0.327 | 225 | UBQLN2       | 0.308 |
| 226 | MPLKIP   | 0.332 | 226 | CUTA         | 0.359 | 226 | HSD17B10     | 0.327 | 226 | PA2G4        | 0.307 |
| 227 | OPA1     | 0.332 | 227 | LOC100129195 | 0.359 | 227 | CDK5R1       | 0.326 | 227 | TPD52L1      | 0.307 |
| 228 | TAS2R41  | 0.332 | 228 | PSAT1        | 0.358 | 228 | RC3H2        | 0.326 | 228 | DENND2C      | 0.307 |
| 229 | RBM10    | 0.331 | 229 | CAND2        | 0.358 | 229 | TP53I11      | 0.325 | 229 | THAP4        | 0.307 |
| 230 | RBM20    | 0.331 | 230 | CD247        | 0.358 | 230 | FLJ34503     | 0.325 | 230 | CIZ1         | 0.307 |
| 231 | HAUS7    | 0.331 | 231 | ZC3H12B      | 0.358 | 231 | CROT         | 0.324 | 231 | NFIA         | 0.306 |
| 232 | FOLH1    | 0.331 | 232 | COX6B1       | 0.358 | 232 | UBE2QL1      | 0.324 | 232 | CELA3A       | 0.306 |
| 233 | THAP4    | 0.331 | 233 | BMPR1A       | 0.358 | 233 | KCNS2        | 0.324 | 233 | LOC100506497 | 0.306 |
| 234 | SRGAP3   | 0.330 | 234 | RBM34        | 0.357 | 234 | RBP1         | 0.324 | 234 | EIF2AK1      | 0.306 |
| 235 | SLC2A9   | 0.330 | 235 | METTL9       | 0.357 | 235 | HIST1H1E     | 0.323 | 235 | NUFIP1       | 0.306 |
| 236 | SLTM     | 0.330 | 236 | PSMC2        | 0.357 | 236 | KIF22        | 0.323 | 236 | PDE8B        | 0.306 |
| 237 | PIN4     | 0.330 | 237 | AP3M1        | 0.357 | 237 | L1CAM        | 0.323 | 237 | KANK4        | 0.306 |
| 238 | DHX9     | 0.330 | 238 | EPS15L1      | 0.357 | 238 | ENAH         | 0.323 | 238 | HCFC1        | 0.305 |
| 239 | PCYT1B   | 0.330 | 239 | MAPK10       | 0.356 | 239 | ARID1B       | 0.323 | 239 | TPRXL        | 0.305 |
| 240 | CBX2     | 0.330 | 240 | SKA3         | 0.356 | 240 | GRIA2        | 0.323 | 240 | LBR          | 0.305 |
| 241 | C1orf124 | 0.329 | 241 | DYNLL1       | 0.356 | 241 | DSCC1        | 0.323 | 241 | MYCBP2       | 0.305 |
| 242 | CLDN8    | 0.328 | 242 | VTA1         | 0.356 | 242 | HES6         | 0.323 | 242 | FASTKD5      | 0.305 |
| 243 | FUZ      | 0.328 | 243 | HIST1H1E     | 0.356 | 243 | EBF3         | 0.323 | 243 | ADAL         | 0.304 |
| 244 | HN1      | 0.328 | 244 | KPTN         | 0.355 | 244 | C11orf53     | 0.322 | 244 | ERP44        | 0.304 |
| 245 | VSIG4    | 0.328 | 245 | CCDC167      | 0.355 | 245 | UBQLN2       | 0.322 | 245 | HIST1H4F     | 0.304 |
| 246 | KPTN     | 0.328 | 246 | TAC1         | 0.354 | 246 | C11orf31     | 0.322 | 246 | LRP4         | 0.304 |
| 247 | CCDC34   | 0.328 | 247 | NDUF53       | 0.354 | 247 | MAB21L3      | 0.322 | 247 | CDK13        | 0.304 |
| 248 | AUTS2    | 0.327 | 248 | C20orf112    | 0.354 | 248 | TAB1         | 0.322 | 248 | TET2         | 0.303 |
| 249 | HIST1H1E | 0.327 | 249 | MTMR9        | 0.354 | 249 | SERF2        | 0.322 | 249 | OXGR1        | 0.303 |
| 250 | POLD2    | 0.327 | 250 | KBTBD7       | 0.354 | 250 | C19orf57     | 0.321 | 250 | FBXL18       | 0.303 |
| 251 | NUP160   | 0.327 | 251 | SLC25A15     | 0.354 | 251 | REEP1        | 0.321 | 251 | COL14A1      | 0.303 |
| 252 | XXYL1    | 0.327 | 252 | TOMM5        | 0.353 | 252 | NUDT11       | 0.321 | 252 | XXYL1        | 0.303 |
| 253 | APOO     | 0.327 | 253 | SKP1         | 0.353 | 253 | PCYT1B       | 0.321 | 253 | SMAD9        | 0.302 |
| 254 | SKA3     | 0.326 | 254 | CITED1       | 0.353 | 254 | MOGAT2       | 0.320 | 254 | CDK5RAP2     | 0.302 |
| 255 | PPIL1    | 0.326 | 255 | TBP          | 0.353 | 255 | TAF12        | 0.319 | 255 | ALDH3A1      | 0.302 |
| 256 | ZXDB     | 0.326 | 256 | LOC100507043 | 0.353 | 256 | NT5C3        | 0.319 | 256 | RNASEH2B     | 0.302 |
| 257 | LBR      | 0.326 | 257 | TCF4         | 0.352 | 257 | EFNB3        | 0.319 | 257 | TIGD1        | 0.302 |
| 258 | PRPF38A  | 0.326 | 258 | C5orf42      | 0.352 | 258 | C1QB         | 0.319 | 258 | RBP1         | 0.302 |
| 259 | ARV1     | 0.325 | 259 | TAF11        | 0.352 | 259 | XKR6         | 0.319 | 259 | DHRS11       | 0.301 |
| 260 | PARD6G   | 0.325 | 260 | C2orf56      | 0.352 | 260 | OPA1         | 0.319 | 260 | LSM5         | 0.301 |
| 261 | GSTM4    | 0.325 | 261 | BOLA3-AS1    | 0.351 | 261 | LPAR6        | 0.318 | 261 | NUCKS1       | 0.301 |
| 262 | GPLD1    | 0.325 | 262 | NKAP         | 0.351 | 262 | TOX          | 0.318 | 262 | FZD1         | 0.300 |
| 263 | POLR1D   | 0.325 | 263 | TUBB2B       | 0.351 | 263 | USP7         | 0.318 | 263 | MGC45800     | 0.300 |
| 264 | PLCD4    | 0.324 | 264 | KIRREL2      | 0.351 | 264 | MAML1        | 0.318 | 264 | CDR1         | 0.300 |
| 265 | DMRT3    | 0.324 | 265 | KCNMB1       | 0.351 | 265 | CD2BP2       | 0.318 | 265 | TCF12        | 0.300 |
| 266 | NUFIP1   | 0.324 | 266 | LYRM4        | 0.351 | 266 | KDM4A        | 0.318 | 266 | CHRNA5       | 0.300 |
| 267 | GBX2     | 0.324 | 267 | C6orf162     | 0.351 | 267 | REV3L        | 0.318 | 267 | FUZ          | 0.300 |

|     |              |       |     |           |       |     |           |       |     |              |       |
|-----|--------------|-------|-----|-----------|-------|-----|-----------|-------|-----|--------------|-------|
| 268 | DSCC1        | 0.324 | 268 | POLR3K    | 0.350 | 268 | RBM23     | 0.318 | 268 | FGF7         | 0.299 |
| 269 | LOC100131354 | 0.324 | 269 | MDM1      | 0.350 | 269 | REV1      | 0.318 | 269 | ZC3H12B      | 0.299 |
| 270 | C15orf59     | 0.323 | 270 | LMNB1     | 0.350 | 270 | TUBB2B    | 0.318 | 270 | TMEM189      | 0.299 |
| 271 | NDUFA10      | 0.323 | 271 | PAFAH1B3  | 0.350 | 271 | SMC1A     | 0.318 | 271 | ZACN         | 0.299 |
| 272 | PDXP         | 0.323 | 272 | NLN       | 0.350 | 272 | HOXA6     | 0.318 | 272 | SH2B1        | 0.299 |
| 273 | D2HGDH       | 0.323 | 273 | WFDC9     | 0.349 | 273 | YAE1D1    | 0.317 | 273 | IGLV5-45     | 0.299 |
| 274 | TCEAL7       | 0.323 | 274 | HINT3     | 0.349 | 274 | S100A1    | 0.317 | 274 | CDAN1        | 0.299 |
| 275 | LRP4         | 0.322 | 275 | HDLBP     | 0.349 | 275 | SYNDIG1   | 0.317 | 275 | MCM3         | 0.298 |
| 276 | HADH         | 0.322 | 276 | PIN4      | 0.349 | 276 | PRPF38A   | 0.317 | 276 | H19          | 0.298 |
| 277 | FAM53B       | 0.322 | 277 | EGFL6     | 0.349 | 277 | KIDINS220 | 0.316 | 277 | C7orf26      | 0.298 |
| 278 | SOX2         | 0.322 | 278 | CXorf36   | 0.349 | 278 | FBXL16    | 0.316 | 278 | ID2          | 0.298 |
| 279 | PTPLAD1      | 0.322 | 279 | KIAA0101  | 0.349 | 279 | RNGTT     | 0.316 | 279 | KIAA0664L3   | 0.298 |
| 280 | HAUS1        | 0.322 | 280 | ZCCHC10   | 0.349 | 280 | C22orf46  | 0.316 | 280 | ANP32A       | 0.298 |
| 281 | RIOK1        | 0.322 | 281 | NOL7      | 0.349 | 281 | KIF26B    | 0.315 | 281 | PEG3         | 0.297 |
| 282 | TOR3A        | 0.322 | 282 | CAMSAP2   | 0.349 | 282 | MEPCE     | 0.315 | 282 | MMP28        | 0.297 |
| 283 | CD247        | 0.322 | 283 | EID3      | 0.349 | 283 | RFX4      | 0.315 | 283 | PSAT1        | 0.297 |
| 284 | ING3         | 0.322 | 284 | GALNT13   | 0.348 | 284 | PIN4      | 0.315 | 284 | PPIP5K1      | 0.297 |
| 285 | HIST1H4F     | 0.321 | 285 | C16orf87  | 0.348 | 285 | TMEM151B  | 0.314 | 285 | HOXB13       | 0.297 |
| 286 | LSM5         | 0.321 | 286 | SAE1      | 0.348 | 286 | PENK      | 0.314 | 286 | CCKBR        | 0.297 |
| 287 | TTLL10       | 0.321 | 287 | PPM1F     | 0.348 | 287 | LOC339400 | 0.314 | 287 | MLST8        | 0.297 |
| 288 | TAF15        | 0.321 | 288 | DLD       | 0.348 | 288 | XRCC5     | 0.314 | 288 | ASF1A        | 0.297 |
| 289 | LYSMD4       | 0.321 | 289 | GNPAT     | 0.348 | 289 | USP42     | 0.313 | 289 | UQCRC2       | 0.297 |
| 290 | TROVE2       | 0.321 | 290 | MYEOV2    | 0.347 | 290 | FZD3      | 0.313 | 290 | FOXO1        | 0.296 |
| 291 | PPARGC1B     | 0.321 | 291 | NHEJ1     | 0.347 | 291 | GTF3C5    | 0.312 | 291 | BLCAP        | 0.296 |
| 292 | BCLAF1       | 0.321 | 292 | NUP153    | 0.346 | 292 | MTOR      | 0.312 | 292 | SLC47A2      | 0.296 |
| 293 | UCHL1        | 0.321 | 293 | LRP3      | 0.346 | 293 | SKP2      | 0.312 | 293 | FAM65B       | 0.296 |
| 294 | NXT2         | 0.320 | 294 | TREML1    | 0.346 | 294 | C20orf112 | 0.312 | 294 | CYP26A1      | 0.296 |
| 295 | EMID2        | 0.320 | 295 | ROR2      | 0.346 | 295 | PDXP      | 0.312 | 295 | RNPS1        | 0.296 |
| 296 | ZC3H12B      | 0.320 | 296 | GYG2      | 0.346 | 296 | FBLL1     | 0.312 | 296 | NDUFAB1      | 0.296 |
| 297 | ODZ3         | 0.320 | 297 | ESD       | 0.346 | 297 | SESN1     | 0.312 | 297 | NCOA1        | 0.296 |
| 298 | GATA4        | 0.320 | 298 | DLX2      | 0.345 | 298 | ATAT1     | 0.311 | 298 | FAM8A1       | 0.296 |
| 299 | TRIM11       | 0.320 | 299 | URB2      | 0.345 | 299 | ADCK2     | 0.311 | 299 | FBXL19       | 0.296 |
| 300 | NRCAM        | 0.319 | 300 | ACN9      | 0.345 | 300 | C7orf59   | 0.310 | 300 | LINC00487    | 0.295 |
| 301 | KIF14        | 0.319 | 301 | C10orf140 | 0.345 | 301 | IPO9      | 0.310 | 301 | OIP5         | 0.295 |
| 302 | SLC47A2      | 0.319 | 302 | NUCKS1    | 0.345 | 302 | BEX2      | 0.310 | 302 | NFATC2IP     | 0.295 |
| 303 | KRT13        | 0.318 | 303 | PTCH1     | 0.345 | 303 | VPS39     | 0.309 | 303 | ROR2         | 0.295 |
| 304 | DTL          | 0.318 | 304 | ANGPT4    | 0.345 | 304 | ZNF436    | 0.309 | 304 | FZD5         | 0.295 |
| 305 | RBM17        | 0.318 | 305 | SKA1      | 0.345 | 305 | PIDD      | 0.309 | 305 | SEPT7P2      | 0.295 |
| 306 | CCKBR        | 0.318 | 306 | RPS19     | 0.345 | 306 | MRAP2     | 0.309 | 306 | RHBDL3       | 0.295 |
| 307 | ALDH3A2      | 0.318 | 307 | AMMECR1L  | 0.345 | 307 | TNFRSF4   | 0.309 | 307 | MPHOSPH8     | 0.294 |
| 308 | GNG4         | 0.318 | 308 | ISOC1     | 0.345 | 308 | USP22     | 0.309 | 308 | NDUFB5       | 0.294 |
| 309 | UNC5B        | 0.318 | 309 | HDAC4     | 0.345 | 309 | LINC00487 | 0.308 | 309 | ANKRD16      | 0.294 |
| 310 | SEPHS1       | 0.317 | 310 | ATRNL1    | 0.345 | 310 | HIST1H3F  | 0.308 | 310 | CEL          | 0.294 |
| 311 | KLHL10       | 0.317 | 311 | TGFBR3    | 0.344 | 311 | MEOX2     | 0.308 | 311 | TBCCD1       | 0.294 |
| 312 | RAB26        | 0.317 | 312 | HNRNPC    | 0.344 | 312 | GATA2     | 0.308 | 312 | LOC100506104 | 0.294 |
| 313 | ZNF507       | 0.317 | 313 | PSMD1     | 0.344 | 313 | ATP5J2    | 0.308 | 313 | GPX2         | 0.294 |
| 314 | TRAPPC2      | 0.316 | 314 | PDE8B     | 0.344 | 314 | ULBP1     | 0.307 | 314 | ZNF629       | 0.293 |
| 315 | PIK3R1       | 0.316 | 315 | DDX49     | 0.344 | 315 | UBE2L3    | 0.307 | 315 | HNRNPUL2     | 0.293 |
| 316 | PRPS2        | 0.316 | 316 | ATRX      | 0.344 | 316 | TEKT2     | 0.307 | 316 | AFG3L2       | 0.293 |
| 317 | PDZD4        | 0.316 | 317 | IRAK1BP1  | 0.344 | 317 | CACNB3    | 0.307 | 317 | OPN1SW       | 0.293 |
| 318 | CENPH        | 0.315 | 318 | TEX30     | 0.343 | 318 | TRIM58    | 0.307 | 318 | CASKIN2      | 0.293 |
| 319 | C4orf45      | 0.315 | 319 | CENPF     | 0.343 | 319 | MADD      | 0.307 | 319 | RG57BP       | 0.293 |
| 320 | SOX7         | 0.315 | 320 | C4orf45   | 0.343 | 320 | NAALAD2   | 0.307 | 320 | WASF1        | 0.293 |
| 321 | GTF2IRD1     | 0.315 | 321 | GNAZ      | 0.343 | 321 | ZC3H12B   | 0.306 | 321 | KRT13        | 0.292 |

|     |           |       |     |           |       |     |              |       |     |              |       |
|-----|-----------|-------|-----|-----------|-------|-----|--------------|-------|-----|--------------|-------|
| 322 | D4S234E   | 0.314 | 322 | PPP2R5D   | 0.342 | 322 | UBE2I        | 0.306 | 322 | TAC1         | 0.292 |
| 323 | RAC3      | 0.314 | 323 | CLTCL1    | 0.342 | 323 | LOC100505920 | 0.306 | 323 | MRPS31       | 0.292 |
| 324 | LOC339166 | 0.314 | 324 | ANP32B    | 0.342 | 324 | MGC16025     | 0.306 | 324 | RBM10        | 0.292 |
| 325 | PABPC5    | 0.314 | 325 | RAB4A     | 0.342 | 325 | DMRT3        | 0.306 | 325 | FTSJD2       | 0.292 |
| 326 | IP6K3     | 0.314 | 326 | PDHA2     | 0.341 | 326 | DCST1        | 0.306 | 326 | FGFR3        | 0.292 |
| 327 | NOL7      | 0.314 | 327 | STK32B    | 0.341 | 327 | C22orf32     | 0.306 | 327 | NR0B1        | 0.292 |
| 328 | CCNB2     | 0.314 | 328 | COL14A1   | 0.341 | 328 | CYCS         | 0.306 | 328 | ODZ3         | 0.292 |
| 329 | TNFRSF4   | 0.314 | 329 | ENDOG     | 0.341 | 329 | FAM168B      | 0.305 | 329 | SNRPE        | 0.291 |
| 330 | ATAT1     | 0.314 | 330 | CCKBR     | 0.341 | 330 | PNKD         | 0.305 | 330 | ITPA         | 0.291 |
| 331 | TUBB2B    | 0.314 | 331 | MARK4     | 0.341 | 331 | LMNB1        | 0.305 | 331 | C1orf187     | 0.291 |
| 332 | TUFM      | 0.313 | 332 | URI1      | 0.340 | 332 | SLC36A1      | 0.305 | 332 | HTN1         | 0.291 |
| 333 | LAG3      | 0.313 | 333 | CDH10     | 0.340 | 333 | DCAF12L2     | 0.305 | 333 | RABGAP1      | 0.290 |
| 334 | GTF3C5    | 0.313 | 334 | KCNS2     | 0.340 | 334 | DMRT2        | 0.305 | 334 | CBX2         | 0.290 |
| 335 | HOTAIR    | 0.313 | 335 | ANKRD54   | 0.340 | 335 | ASMT         | 0.305 | 335 | HOXA4        | 0.289 |
| 336 | BUB1B     | 0.313 | 336 | TAS1R1    | 0.339 | 336 | GARS         | 0.304 | 336 | SIX3         | 0.289 |
| 337 | CHD5      | 0.313 | 337 | FXN       | 0.339 | 337 | SLC25A4      | 0.304 | 337 | MAGOHB       | 0.289 |
| 338 | GIP       | 0.313 | 338 | PPIA      | 0.339 | 338 | ZNF764       | 0.304 | 338 | LPCAT3       | 0.289 |
| 339 | GLI1      | 0.313 | 339 | PCMT1     | 0.339 | 339 | UCK1         | 0.304 | 339 | FABP4        | 0.289 |
| 340 | PKD1      | 0.313 | 340 | LOC730101 | 0.339 | 340 | LOC729852    | 0.304 | 340 | TCF20        | 0.289 |
| 341 | INA       | 0.312 | 341 | FAM20B    | 0.339 | 341 | GRM2         | 0.304 | 341 | GAS7         | 0.289 |
| 342 | GSG2      | 0.312 | 342 | ANKRD26P3 | 0.339 | 342 | SHPRH        | 0.304 | 342 | CLEC2L       | 0.289 |
| 343 | APOOL     | 0.312 | 343 | PARG      | 0.339 | 343 | MYCBP2       | 0.304 | 343 | RNF40        | 0.289 |
| 344 | FAM172A   | 0.312 | 344 | ZBTB5     | 0.338 | 344 | ZNF184       | 0.304 | 344 | LOC100505946 | 0.289 |
| 345 | RBM12     | 0.312 | 345 | POLR2I    | 0.338 | 345 | PHF2         | 0.303 | 345 | RP9          | 0.288 |
| 346 | MAPK12    | 0.312 | 346 | HNRNPA3   | 0.338 | 346 | SYNGR4       | 0.303 | 346 | SDK1         | 0.288 |
| 347 | EFCAB1    | 0.312 | 347 | AHI1      | 0.338 | 347 | DLGAP1       | 0.303 | 347 | HOXA13       | 0.288 |
| 348 | DLK1      | 0.312 | 348 | MRPL44    | 0.338 | 348 | UQCR10       | 0.303 | 348 | SHMT1        | 0.288 |
| 349 | TBCCD1    | 0.311 | 349 | FAM168B   | 0.338 | 349 | FLJ13197     | 0.303 | 349 | OR7D2        | 0.288 |
| 350 | RBBP4     | 0.311 | 350 | KIAA0319  | 0.337 | 350 | ID4          | 0.303 | 350 | NASP         | 0.288 |
| 351 | MRI1      | 0.311 | 351 | PNKD      | 0.337 | 351 | KIAA0664L3   | 0.303 | 351 | PCNA         | 0.287 |
| 352 | KPNA3     | 0.311 | 352 | CDCA7     | 0.337 | 352 | RCC2         | 0.303 | 352 | HOXC6        | 0.287 |
| 353 | LINC00052 | 0.311 | 353 | NDUFA5    | 0.337 | 353 | LOC389023    | 0.302 | 353 | MRPS18A      | 0.287 |
| 354 | KBTBD2    | 0.311 | 354 | FUZ       | 0.337 | 354 | CCKBR        | 0.302 | 354 | C6orf47      | 0.287 |
| 355 | DEK       | 0.310 | 355 | HADH      | 0.337 | 355 | PELI2        | 0.302 | 355 | ZNF770       | 0.287 |
| 356 | CYP26A1   | 0.310 | 356 | PAK1IP1   | 0.336 | 356 | COL3A1       | 0.302 | 356 | NHEJ1        | 0.286 |
| 357 | DPYSL4    | 0.310 | 357 | LOC285819 | 0.336 | 357 | HTATSF1      | 0.302 | 357 | SLCO1A2      | 0.286 |
| 358 | MLLT11    | 0.310 | 358 | GPLD1     | 0.336 | 358 | PANK1        | 0.302 | 358 | RFC4         | 0.286 |
| 359 | NUCKS1    | 0.310 | 359 | C20orf7   | 0.336 | 359 | USP37        | 0.302 | 359 | SLC12A3      | 0.286 |
| 360 | PURB      | 0.310 | 360 | PIBF1     | 0.336 | 360 | HNRNPA0      | 0.302 | 360 | DSG3         | 0.286 |
| 361 | MIR205    | 0.310 | 361 | EXOC2     | 0.336 | 361 | FBXL21       | 0.302 | 361 | IDH1         | 0.286 |
| 362 | ANO7      | 0.310 | 362 | ZXDB      | 0.336 | 362 | ILKAP        | 0.302 | 362 | MRPS9        | 0.286 |
| 363 | BRD3      | 0.310 | 363 | OSTM1     | 0.335 | 363 | SRGAP3       | 0.302 | 363 | SLC25A14     | 0.286 |
| 364 | DLX1      | 0.310 | 364 | CHAMP1    | 0.335 | 364 | ZXDC         | 0.302 | 364 | SMAD6        | 0.286 |
| 365 | CLUL1     | 0.310 | 365 | PNMT      | 0.335 | 365 | CAMTA1       | 0.301 | 365 | RCC2         | 0.285 |
| 366 | NAA16     | 0.309 | 366 | DPY19L3   | 0.335 | 366 | CRIP3        | 0.301 | 366 | DVL3         | 0.285 |
| 367 | SULF1     | 0.309 | 367 | HSF2      | 0.334 | 367 | LOC728537    | 0.301 | 367 | ZNF48        | 0.285 |
| 368 | EIF1AX    | 0.309 | 368 | FBXO9     | 0.334 | 368 | FAM53B       | 0.301 | 368 | FAR2         | 0.285 |
| 369 | ESD       | 0.309 | 369 | FAM210A   | 0.333 | 369 | LRRC57       | 0.300 | 369 | DCTPP1       | 0.285 |
| 370 | EXOSC8    | 0.309 | 370 | BCLAF1    | 0.333 | 370 | GPRASP1      | 0.300 | 370 | HCN4         | 0.285 |
| 371 | E2F2      | 0.309 | 371 | ARV1      | 0.333 | 371 | CERK         | 0.300 | 371 | POMP         | 0.285 |
| 372 | DSCR6     | 0.309 | 372 | MRAP2     | 0.333 | 372 | IP6K3        | 0.300 | 372 | NUP160       | 0.284 |
| 373 | EMD       | 0.308 | 373 | TBXA2R    | 0.332 | 373 | ANP32B       | 0.300 | 373 | MTOR         | 0.284 |
| 374 | RABIF     | 0.308 | 374 | DMXL2     | 0.332 | 374 | CABP7        | 0.300 | 374 | CRYAB        | 0.284 |
| 375 | SLC6A8    | 0.308 | 375 | 39876     | 0.332 | 375 | JAKMIP2      | 0.300 | 375 | RBBP6        | 0.284 |

|     |              |       |     |              |       |     |              |       |     |              |       |
|-----|--------------|-------|-----|--------------|-------|-----|--------------|-------|-----|--------------|-------|
| 376 | PSMG1        | 0.308 | 376 | HSDL2        | 0.332 | 376 | SLC25A35     | 0.299 | 376 | KIAA1704     | 0.284 |
| 377 | MGC45800     | 0.308 | 377 | MMP12        | 0.332 | 377 | RNF40        | 0.299 | 377 | DROSHA       | 0.283 |
| 378 | SLCO1A2      | 0.308 | 378 | RBM45        | 0.332 | 378 | CHRNA5       | 0.299 | 378 | TBRG4        | 0.283 |
| 379 | RTF1         | 0.308 | 379 | E2F2         | 0.332 | 379 | PPP1R7       | 0.299 | 379 | IAPP         | 0.283 |
| 380 | DDX42        | 0.307 | 380 | BUB1B        | 0.331 | 380 | ZRSR2        | 0.299 | 380 | GUCY2F       | 0.283 |
| 381 | GRIA2        | 0.307 | 381 | SGTB         | 0.331 | 381 | PHKA2        | 0.299 | 381 | TAF2         | 0.283 |
| 382 | TRO          | 0.307 | 382 | PLAA         | 0.331 | 382 | CDCA7        | 0.299 | 382 | IBA57        | 0.283 |
| 383 | ENDOG        | 0.307 | 383 | TMEM97       | 0.331 | 383 | NDUFA10      | 0.299 | 383 | HSPB2        | 0.282 |
| 384 | PELI2        | 0.307 | 384 | ZNF260       | 0.331 | 384 | GUCA2B       | 0.299 | 384 | KPTN         | 0.282 |
| 385 | EPHA5        | 0.307 | 385 | PFDN6        | 0.330 | 385 | THAP9        | 0.298 | 385 | FAM168B      | 0.282 |
| 386 | CEP78        | 0.307 | 386 | UBQLN2       | 0.330 | 386 | PON1         | 0.298 | 386 | UHRF1BP1     | 0.282 |
| 387 | ZNF770       | 0.306 | 387 | HIST1H1D     | 0.330 | 387 | LOC100507353 | 0.298 | 387 | SEPHS2       | 0.282 |
| 388 | ANKRD54      | 0.306 | 388 | C9orf91      | 0.330 | 388 | GGA1         | 0.297 | 388 | PLEKHA2      | 0.282 |
| 389 | PDE3B        | 0.306 | 389 | SRSF3        | 0.329 | 389 | SCN3B        | 0.297 | 389 | KIAA0564     | 0.282 |
| 390 | CADM3        | 0.306 | 390 | TBC1D24      | 0.329 | 390 | KCNH3        | 0.297 | 390 | LOC100129195 | 0.281 |
| 391 | LGALS1       | 0.306 | 391 | ROCK1        | 0.329 | 391 | POU4F2       | 0.297 | 391 | C11orf49     | 0.281 |
| 392 | TREML1       | 0.306 | 392 | SMCP         | 0.329 | 392 | RFC2         | 0.297 | 392 | FBLN1        | 0.281 |
| 393 | SPAST        | 0.306 | 393 | AK5          | 0.329 | 393 | INA          | 0.297 | 393 | CCNB2        | 0.281 |
| 394 | RBP1         | 0.306 | 394 | NOL12        | 0.329 | 394 | MED4         | 0.297 | 394 | TNNI1        | 0.281 |
| 395 | ADAL         | 0.305 | 395 | RBMX         | 0.328 | 395 | DECR2        | 0.296 | 395 | CHD6         | 0.281 |
| 396 | LOC100505515 | 0.305 | 396 | SUMO1        | 0.328 | 396 | RBBP4        | 0.296 | 396 | PROSER1      | 0.281 |
| 397 | TET1         | 0.305 | 397 | FANCB        | 0.328 | 397 | LOC339166    | 0.296 | 397 | GSG2         | 0.281 |
| 398 | DUT          | 0.305 | 398 | OSBPL11      | 0.328 | 398 | NHSL1        | 0.296 | 398 | ZC3H4        | 0.281 |
| 399 | ALMS1        | 0.305 | 399 | ILKAP        | 0.328 | 399 | EEF1A1       | 0.296 | 399 | PER2         | 0.280 |
| 400 | TAB1         | 0.305 | 400 | MIR600HG     | 0.328 | 400 | SLC26A10     | 0.296 | 400 | KBTBD2       | 0.280 |
| 401 | LINC00479    | 0.305 | 401 | LOC100506343 | 0.328 | 401 | ERCC3        | 0.296 | 401 | NAA16        | 0.280 |
| 402 | URB2         | 0.305 | 402 | NDUFA4       | 0.328 | 402 | CALB1        | 0.296 | 402 | FAT2         | 0.280 |
| 403 | CNTLN        | 0.305 | 403 | ERF          | 0.328 | 403 | C7orf29      | 0.296 | 403 | ATP5G3       | 0.279 |
| 404 | REV3L        | 0.304 | 404 | HAT1         | 0.327 | 404 | CENPH        | 0.295 | 404 | CCDC101      | 0.279 |
| 405 | ISOC1        | 0.304 | 405 | RBM10        | 0.327 | 405 | ATRX         | 0.295 | 405 | GPR124       | 0.279 |
| 406 | ZACN         | 0.304 | 406 | TET1         | 0.327 | 406 | DTNBP1       | 0.295 | 406 | CCDC50       | 0.279 |
| 407 | RFC4         | 0.304 | 407 | TTF2         | 0.327 | 407 | SOX18        | 0.295 | 407 | PELI2        | 0.279 |
| 408 | PSIP1        | 0.304 | 408 | WT1          | 0.327 | 408 | DDX25        | 0.295 | 408 | IPO9         | 0.279 |
| 409 | CYP4F11      | 0.304 | 409 | LAS1L        | 0.327 | 409 | TCEAL7       | 0.294 | 409 | PPP3R2       | 0.278 |
| 410 | HTATSF1      | 0.303 | 410 | DISC1        | 0.327 | 410 | BCL9         | 0.294 | 410 | GTF3C5       | 0.278 |
| 411 | SLITRK5      | 0.303 | 411 | ZNF420       | 0.327 | 411 | RPS27A       | 0.294 | 411 | ABCC1        | 0.278 |
| 412 | PDCD2        | 0.303 | 412 | SBF2         | 0.327 | 412 | CBX3         | 0.294 | 412 | LOC100507534 | 0.278 |
| 413 | ANKS6        | 0.303 | 413 | LIN54        | 0.327 | 413 | KRTAP2-4     | 0.294 | 413 | SLC7A5       | 0.278 |
| 414 | C7orf26      | 0.303 | 414 | GKAP1        | 0.326 | 414 | NEFH         | 0.294 | 414 | HADHA        | 0.278 |
| 415 | TSHB         | 0.303 | 415 | KLRD1        | 0.326 | 415 | PBRM1        | 0.294 | 415 | CDC23        | 0.277 |
| 416 | SNX12        | 0.302 | 416 | ARL3         | 0.326 | 416 | HNRNPAB      | 0.294 | 416 | EHMT1        | 0.277 |
| 417 | KIAA0564     | 0.302 | 417 | BBIP1        | 0.325 | 417 | C10orf95     | 0.294 | 417 | SHPRH        | 0.277 |
| 418 | CITED1       | 0.302 | 418 | ZNF711       | 0.325 | 418 | ITM2C        | 0.294 | 418 | TMEM237      | 0.277 |
| 419 | CCP110       | 0.302 | 419 | ACER3        | 0.325 | 419 | BEX1         | 0.294 | 419 | 39881        | 0.277 |
| 420 | AGFG1        | 0.302 | 420 | CACYBP       | 0.325 | 420 | GAL3ST2      | 0.294 | 420 | KPNA3        | 0.277 |
| 421 | HBG2         | 0.302 | 421 | DSCC1        | 0.325 | 421 | HOXD8        | 0.294 | 421 | TRIM13       | 0.277 |
| 422 | RNF8         | 0.301 | 422 | PDCD2        | 0.325 | 422 | SYK          | 0.293 | 422 | MYCBPAP      | 0.277 |
| 423 | CABYR        | 0.301 | 423 | KIF4A        | 0.325 | 423 | NONO         | 0.293 | 423 | HNRNPM       | 0.277 |
| 424 | NUSAP1       | 0.301 | 424 | LOC100506108 | 0.324 | 424 | ZNF620       | 0.293 | 424 | FECH         | 0.276 |
| 425 | MTMR8        | 0.301 | 425 | FASTKD5      | 0.324 | 425 | GALNTL1      | 0.293 | 425 | NDUFA8       | 0.276 |
| 426 | ABCB10       | 0.301 | 426 | SMAD2        | 0.324 | 426 | ZBTB5        | 0.293 | 426 | FERD3L       | 0.276 |
| 427 | MCM3         | 0.301 | 427 | SEH1L        | 0.324 | 427 | SESTD1       | 0.293 | 427 | ZNF436       | 0.276 |
| 428 | MDM1         | 0.301 | 428 | HOXC9        | 0.323 | 428 | TMEM198      | 0.292 | 428 | PLCD4        | 0.276 |
| 429 | ZCCHC3       | 0.300 | 429 | FBXO43       | 0.323 | 429 | NNT          | 0.292 | 429 | MLLT11       | 0.276 |

|     |              |       |     |          |       |     |              |       |     |              |       |
|-----|--------------|-------|-----|----------|-------|-----|--------------|-------|-----|--------------|-------|
| 430 | PRKX         | 0.300 | 430 | PFAS     | 0.323 | 430 | DYDC2        | 0.292 | 430 | PPM1E        | 0.276 |
| 431 | CDC23        | 0.300 | 431 | ELFN1    | 0.323 | 431 | FAM215A      | 0.292 | 431 | TSHZ1        | 0.275 |
| 432 | ZNF768       | 0.300 | 432 | RABIF    | 0.323 | 432 | RND2         | 0.292 | 432 | MFNG         | 0.275 |
| 433 | TET2         | 0.300 | 433 | CDH2     | 0.322 | 433 | PIPOX        | 0.292 | 433 | RBM45        | 0.275 |
| 434 | LOC100134361 | 0.299 | 434 | KCTD15   | 0.322 | 434 | NXT2         | 0.292 | 434 | SRRM2        | 0.275 |
| 435 | LINC00523    | 0.299 | 435 | CDK5RAP2 | 0.322 | 435 | JAM3         | 0.292 | 435 | RAB26        | 0.275 |
| 436 | COL2A1       | 0.299 | 436 | UCK2     | 0.322 | 436 | FARP1        | 0.292 | 436 | LOC100130950 | 0.275 |
| 437 | TBX1         | 0.299 | 437 | SPAST    | 0.322 | 437 | MECP2        | 0.292 | 437 | NTRK2        | 0.275 |
| 438 | KIRREL2      | 0.299 | 438 | KIAA1549 | 0.322 | 438 | KIAA0895     | 0.291 | 438 | CAMKMT       | 0.275 |
| 439 | FARSB        | 0.299 | 439 | KDELCL1  | 0.322 | 439 | SHISA8       | 0.291 | 439 | CRMP1        | 0.275 |
| 440 | FANCE        | 0.299 | 440 | SLC25A30 | 0.322 | 440 | SYP          | 0.291 | 440 | TOR3A        | 0.274 |
| 441 | POLR3K       | 0.299 | 441 | KIAA2022 | 0.322 | 441 | SAP18        | 0.291 | 441 | HAUS7        | 0.274 |
| 442 | C16orf93     | 0.299 | 442 | ZNF281   | 0.322 | 442 | AK1          | 0.291 | 442 | MMEL1        | 0.274 |
| 443 | PARG         | 0.299 | 443 | KIAA0895 | 0.321 | 443 | SEPHS1       | 0.291 | 443 | GPR137B      | 0.274 |
| 444 | PIGX         | 0.298 | 444 | RBPM52   | 0.321 | 444 | ZNF678       | 0.291 | 444 | FLJ11235     | 0.274 |
| 445 | C14orf142    | 0.298 | 445 | INTS7    | 0.321 | 445 | IQCA1        | 0.291 | 445 | SLC9A3R1     | 0.274 |
| 446 | CASKIN2      | 0.298 | 446 | GLA      | 0.321 | 446 | CD8A         | 0.291 | 446 | RIOK1        | 0.273 |
| 447 | RP2          | 0.298 | 447 | AGFG1    | 0.321 | 447 | TET2         | 0.291 | 447 | SRSF6        | 0.273 |
| 448 | LOC100130950 | 0.298 | 448 | COX20    | 0.321 | 448 | ZNF500       | 0.291 | 448 | RFC3         | 0.273 |
| 449 | RP9          | 0.298 | 449 | RPP30    | 0.321 | 449 | CNTLN        | 0.290 | 449 | BTNL9        | 0.273 |
| 450 | TRAV8-6      | 0.298 | 450 | HOXC6    | 0.321 | 450 | UBE2V2       | 0.290 | 450 | TCAP         | 0.273 |
| 451 | NUDT15       | 0.298 | 451 | CIZ1     | 0.321 | 451 | PURB         | 0.290 | 451 | PI15         | 0.273 |
| 452 | TCF12        | 0.297 | 452 | RBBP9    | 0.320 | 452 | C22orf39     | 0.290 | 452 | C7           | 0.273 |
| 453 | GUCY2F       | 0.297 | 453 | FOPNL    | 0.320 | 453 | TBC1D2B      | 0.290 | 453 | FLT3         | 0.272 |
| 454 | ALDH1A1      | 0.297 | 454 | CRYAB    | 0.320 | 454 | TAF1         | 0.290 | 454 | JAM3         | 0.272 |
| 455 | GRIPAP1      | 0.297 | 455 | ZCCHC2   | 0.319 | 455 | HOXD9        | 0.289 | 455 | NKX2-5       | 0.272 |
| 456 | PLA2G10      | 0.297 | 456 | RBM12    | 0.319 | 456 | DHX9         | 0.289 | 456 | MIR600HG     | 0.272 |
| 457 | HUWE1        | 0.297 | 457 | DPYSL4   | 0.319 | 457 | XPA          | 0.288 | 457 | ZNF488       | 0.272 |
| 458 | SLC48A1      | 0.297 | 458 | KLHL14   | 0.319 | 458 | LOC283588    | 0.288 | 458 | PTH2R        | 0.272 |
| 459 | TCAP         | 0.296 | 459 | CTIF     | 0.319 | 459 | CIC          | 0.288 | 459 | ZZEF1        | 0.272 |
| 460 | PRDX1        | 0.296 | 460 | AKR1C1   | 0.319 | 460 | MLL3         | 0.288 | 460 | GLI1         | 0.272 |
| 461 | SLC25A15     | 0.296 | 461 | PEPD     | 0.319 | 461 | RAB39A       | 0.288 | 461 | EIF4E2       | 0.272 |
| 462 | ELFN1        | 0.296 | 462 | CHRNA5   | 0.319 | 462 | VANGL2       | 0.287 | 462 | ZIC3         | 0.272 |
| 463 | EIF3K        | 0.296 | 463 | ZNF529   | 0.319 | 463 | FNDC5        | 0.287 | 463 | CARD9        | 0.271 |
| 464 | FBLL1        | 0.296 | 464 | MYCBP2   | 0.319 | 464 | LOC100130950 | 0.287 | 464 | HDCC2        | 0.271 |
| 465 | MGC27345     | 0.296 | 465 | KPNA3    | 0.318 | 465 | ZKSCAN1      | 0.287 | 465 | PSMC2        | 0.271 |
| 466 | RMI1         | 0.295 | 466 | GABPA    | 0.318 | 466 | UBN2         | 0.287 | 466 | RP9P         | 0.271 |
| 467 | HNRNPM       | 0.295 | 467 | NUDT11   | 0.318 | 467 | TAF11        | 0.287 | 467 | ATRX         | 0.271 |
| 468 | KIAA1549     | 0.295 | 468 | ZIM2     | 0.318 | 468 | SUCLA2       | 0.286 | 468 | BUB1B        | 0.271 |
| 469 | CDK5RAP2     | 0.295 | 469 | COX5A    | 0.318 | 469 | GPR182       | 0.286 | 469 | C16orf79     | 0.271 |
| 470 | NUP153       | 0.295 | 470 | ID4      | 0.318 | 470 | RUNDC3A      | 0.286 | 470 | KIAA0319     | 0.271 |
| 471 | NUP210P1     | 0.295 | 471 | CA4      | 0.318 | 471 | SCG3         | 0.286 | 471 | EIF3K        | 0.271 |
| 472 | NELL2        | 0.295 | 472 | WFDC1    | 0.318 | 472 | LINC00282    | 0.286 | 472 | TBX3         | 0.271 |
| 473 | LSM2         | 0.295 | 473 | MRPS9    | 0.318 | 473 | GNRH2        | 0.285 | 473 | PPP1R15B     | 0.270 |
| 474 | LOC149086    | 0.294 | 474 | GNAI1    | 0.318 | 474 | ARHGEF6      | 0.285 | 474 | PPIL1        | 0.270 |
| 475 | PARP16       | 0.294 | 475 | RBM26    | 0.318 | 475 | CXorf57      | 0.285 | 475 | LOC730101    | 0.270 |
| 476 | NDUFA1       | 0.294 | 476 | TUB      | 0.317 | 476 | LOC100506343 | 0.285 | 476 | GYG2         | 0.270 |
| 477 | POMP         | 0.294 | 477 | PSMA4    | 0.317 | 477 | GYG2         | 0.285 | 477 | RMI1         | 0.270 |
| 478 | 40059        | 0.294 | 478 | FAM55C   | 0.316 | 478 | TPO          | 0.285 | 478 | NDUFA1       | 0.270 |
| 479 | C2orf56      | 0.294 | 479 | FAM172A  | 0.316 | 479 | MLL5         | 0.284 | 479 | EARS2        | 0.270 |
| 480 | TAS1R1       | 0.294 | 480 | SLC25A17 | 0.316 | 480 | RPAIN        | 0.284 | 480 | ABC86        | 0.270 |
| 481 | TRMT6        | 0.294 | 481 | ZCCHC7   | 0.316 | 481 | IGLV5-45     | 0.284 | 481 | PHF2         | 0.270 |
| 482 | KIAA2022     | 0.294 | 482 | MCM3     | 0.316 | 482 | NUDCD3       | 0.284 | 482 | USP42        | 0.270 |
| 483 | MTMR9        | 0.294 | 483 | SENP6    | 0.316 | 483 | HOXA4        | 0.284 | 483 | CCAR1        | 0.270 |

|     |              |       |     |              |       |     |          |       |     |           |       |
|-----|--------------|-------|-----|--------------|-------|-----|----------|-------|-----|-----------|-------|
| 484 | TUSC5        | 0.293 | 484 | PLCXD1       | 0.316 | 484 | RGS7     | 0.284 | 484 | ATP5J     | 0.270 |
| 485 | TXN          | 0.293 | 485 | FAM155B      | 0.315 | 485 | KIAA1549 | 0.284 | 485 | ZNF192    | 0.270 |
| 486 | IFT88        | 0.293 | 486 | PALM         | 0.315 | 486 | LDOC1L   | 0.284 | 486 | PIAS1     | 0.269 |
| 487 | HDAC2        | 0.293 | 487 | PCNA         | 0.315 | 487 | MAPK12   | 0.284 | 487 | E4F1      | 0.269 |
| 488 | PER2         | 0.293 | 488 | TMEM14A      | 0.315 | 488 | MAGEF1   | 0.283 | 488 | AMBRA1    | 0.269 |
| 489 | SERPINB13    | 0.293 | 489 | PRPF38A      | 0.315 | 489 | C7orf41  | 0.283 | 489 | SLC2A9    | 0.269 |
| 490 | CSDC2        | 0.292 | 490 | ESCO2        | 0.315 | 490 | KIAA0182 | 0.283 | 490 | FAM122B   | 0.269 |
| 491 | CLN6         | 0.292 | 491 | GNAL         | 0.315 | 491 | CA5B     | 0.283 | 491 | UPF3A     | 0.269 |
| 492 | NKAP         | 0.292 | 492 | PHF8         | 0.315 | 492 | BUD31    | 0.283 | 492 | COL2A1    | 0.269 |
| 493 | ZZEF1        | 0.292 | 493 | PHF10        | 0.315 | 493 | CHD5     | 0.283 | 493 | SERPINF1  | 0.269 |
| 494 | NT5M         | 0.292 | 494 | PARD6G       | 0.315 | 494 | CCDC90A  | 0.283 | 494 | TIMP3     | 0.269 |
| 495 | ZNF343       | 0.292 | 495 | IQCA1        | 0.314 | 495 | ATP6V1G1 | 0.283 | 495 | INHBC     | 0.269 |
| 496 | SNRNP25      | 0.292 | 496 | SPRYD7       | 0.314 | 496 | SMARCD3  | 0.282 | 496 | HDAC4     | 0.269 |
| 497 | RNF114       | 0.291 | 497 | TOB1         | 0.314 | 497 | TRIM11   | 0.282 | 497 | SMCHD1    | 0.269 |
| 498 | CDAN1        | 0.291 | 498 | MTO1         | 0.314 | 498 | NIPBL    | 0.282 | 498 | SPICE1    | 0.269 |
| 499 | LOC730101    | 0.291 | 499 | UPF3A        | 0.314 | 499 | MAPK11   | 0.281 | 499 | PPFIBP2   | 0.269 |
| 500 | ARHGAP35     | 0.291 | 500 | NSMCE4A      | 0.314 | 500 | ARF5     | 0.281 | 500 | MAML1     | 0.269 |
| 501 | FAM215A      | 0.291 | 501 | CHRDL2       | 0.314 | 501 | SLC25A25 | 0.281 | 501 | PARN      | 0.269 |
| 502 | MRPS26       | 0.291 | 502 | HDHD2        | 0.314 | 502 | ZFP106   | 0.281 | 502 | LOC83954  | 0.269 |
| 503 | NUDT11       | 0.291 | 503 | MELK         | 0.313 | 503 | HIST1H3G | 0.281 | 503 | SLC6A5    | 0.268 |
| 504 | PPPDE1       | 0.291 | 504 | ORC5         | 0.313 | 504 | SHC2     | 0.281 | 504 | AKR1C3    | 0.268 |
| 505 | SRSF1        | 0.291 | 505 | ZNF225       | 0.313 | 505 | GIP      | 0.281 | 505 | KANK1     | 0.268 |
| 506 | RAB4A        | 0.290 | 506 | ECI1         | 0.313 | 506 | IWS1     | 0.281 | 506 | GATS      | 0.268 |
| 507 | ZNF213       | 0.290 | 507 | NDUFA8       | 0.313 | 507 | BEND4    | 0.281 | 507 | MFAP3     | 0.268 |
| 508 | FERD3L       | 0.290 | 508 | 39872        | 0.313 | 508 | CBX7     | 0.281 | 508 | ATG4B     | 0.268 |
| 509 | SH3GL3       | 0.290 | 509 | SLC35B4      | 0.313 | 509 | SULT4A1  | 0.280 | 509 | PRR24     | 0.268 |
| 510 | UBE2I        | 0.290 | 510 | LSM5         | 0.313 | 510 | BARX1    | 0.280 | 510 | IFT88     | 0.268 |
| 511 | TIMM21       | 0.290 | 511 | MTMR10       | 0.312 | 511 | C5orf24  | 0.280 | 511 | C5orf42   | 0.268 |
| 512 | PLA2G2D      | 0.290 | 512 | CXorf67      | 0.312 | 512 | HSD17B1  | 0.280 | 512 | GPLD1     | 0.268 |
| 513 | MADD         | 0.289 | 513 | BEX1         | 0.312 | 513 | PGAP1    | 0.280 | 513 | BRP44     | 0.268 |
| 514 | HRG          | 0.289 | 514 | LOC283688    | 0.312 | 514 | SARM1    | 0.280 | 514 | RBM20     | 0.268 |
| 515 | SRSF6        | 0.289 | 515 | WASF1        | 0.312 | 515 | RABGAP1  | 0.280 | 515 | LIFR-AS1  | 0.267 |
| 516 | SMAD9        | 0.289 | 516 | CENPH        | 0.312 | 516 | PTCH1    | 0.280 | 516 | PLCL1     | 0.267 |
| 517 | TRAV12-1     | 0.289 | 517 | ZMAT4        | 0.312 | 517 | CDK5RAP2 | 0.280 | 517 | TAF3      | 0.267 |
| 518 | TSNAX        | 0.289 | 518 | NCOA1        | 0.312 | 518 | PHIP     | 0.280 | 518 | HUWE1     | 0.267 |
| 519 | KIAA0895     | 0.289 | 519 | CBX2         | 0.312 | 519 | CDK8     | 0.279 | 519 | LOC284804 | 0.267 |
| 520 | TTF1         | 0.288 | 520 | ZCCHC3       | 0.312 | 520 | FOXD2    | 0.279 | 520 | ZNF219    | 0.267 |
| 521 | THAP5        | 0.288 | 521 | NENF         | 0.312 | 521 | ZNF396   | 0.279 | 521 | MORF4L1   | 0.267 |
| 522 | FANCI        | 0.288 | 522 | CNTLN        | 0.312 | 522 | SKP1     | 0.279 | 522 | C1orf111  | 0.267 |
| 523 | LOC100506597 | 0.288 | 523 | KCNJ12       | 0.311 | 523 | KLHL9    | 0.279 | 523 | B4GALT5   | 0.267 |
| 524 | C1orf35      | 0.288 | 524 | DENND2C      | 0.311 | 524 | HIST1H3D | 0.279 | 524 | PRR12     | 0.267 |
| 525 | FAM48A       | 0.288 | 525 | ABHD13       | 0.311 | 525 | DCUN1D2  | 0.278 | 525 | USP8      | 0.267 |
| 526 | TAF3         | 0.288 | 526 | MOGAT2       | 0.311 | 526 | GTF2I    | 0.278 | 526 | CADM3     | 0.266 |
| 527 | FOPNL        | 0.288 | 527 | LOC154092    | 0.311 | 527 | KLRD1    | 0.278 | 527 | C9orf29   | 0.266 |
| 528 | MAPK6        | 0.288 | 528 | B9D2         | 0.311 | 528 | PAFAH1B3 | 0.278 | 528 | TRIM11    | 0.266 |
| 529 | HDAC10       | 0.288 | 529 | NDUFA10      | 0.311 | 529 | RGS7BP   | 0.278 | 529 | CRIP2     | 0.266 |
| 530 | ATP5J2       | 0.287 | 530 | BLMH         | 0.311 | 530 | RIMS3    | 0.278 | 530 | SCAF8     | 0.266 |
| 531 | UNK          | 0.287 | 531 | KIFC1        | 0.311 | 531 | TMOD2    | 0.278 | 531 | GSTA1     | 0.265 |
| 532 | SPP1         | 0.287 | 532 | IGLV5-45     | 0.311 | 532 | UNC5B    | 0.278 | 532 | ALG5      | 0.265 |
| 533 | NT5C3        | 0.287 | 533 | BYSL         | 0.311 | 533 | RBMX     | 0.278 | 533 | MUT       | 0.265 |
| 534 | MAFG         | 0.287 | 534 | TAF3         | 0.311 | 534 | HMGB1    | 0.278 | 534 | TAB1      | 0.265 |
| 535 | FAM122B      | 0.287 | 535 | LOC100131354 | 0.311 | 535 | PGF      | 0.278 | 535 | HERC2     | 0.265 |
| 536 | NENF         | 0.287 | 536 | TIPRL        | 0.311 | 536 | DAB2IP   | 0.277 | 536 | RALA      | 0.265 |
| 537 | LAS1L        | 0.287 | 537 | NUFIP1       | 0.311 | 537 | PKD1     | 0.277 | 537 | HIST1H3G  | 0.265 |



|     |           |       |     |                |       |     |           |       |     |              |       |
|-----|-----------|-------|-----|----------------|-------|-----|-----------|-------|-----|--------------|-------|
| 538 | RASL10B   | 0.287 | 538 | OGG1           | 0.310 | 538 | MGC27345  | 0.277 | 538 | CDH2         | 0.265 |
| 539 | SLC35A4   | 0.287 | 539 | HNRNPM         | 0.310 | 539 | CEL       | 0.277 | 539 | EFNB1        | 0.265 |
| 540 | CAPRIN1   | 0.287 | 540 | IQSEC2         | 0.310 | 540 | MCM6      | 0.277 | 540 | HNRNPA3      | 0.265 |
| 541 | CYBASC3   | 0.287 | 541 | TXNL1          | 0.310 | 541 | MICAL1    | 0.277 | 541 | EMD          | 0.265 |
| 542 | ACN9      | 0.286 | 542 | TRIM58         | 0.310 | 542 | MLST8     | 0.277 | 542 | RAP1GAP      | 0.264 |
| 543 | RAPGEF4   | 0.286 | 543 | RSL24D1        | 0.310 | 543 | LOC90246  | 0.277 | 543 | NFATC3       | 0.264 |
| 544 | KCMF1     | 0.286 | 544 | PKD1           | 0.310 | 544 | SBK1      | 0.277 | 544 | KCNS2        | 0.264 |
| 545 | AMZ2P1    | 0.286 | 545 | S1PR1          | 0.310 | 545 | C15orf17  | 0.277 | 545 | MAZ          | 0.264 |
| 546 | TSTD2     | 0.286 | 546 | RAVER2         | 0.310 | 546 | CHGB      | 0.276 | 546 | SEC31B       | 0.264 |
| 547 | GNRH2     | 0.286 | 547 | MYOM2          | 0.309 | 547 | PCDHGB7   | 0.276 | 547 | MRPL44       | 0.264 |
| 548 | ANGPT4    | 0.286 | 548 | EIF4E2         | 0.309 | 548 | SOSTDC1   | 0.276 | 548 | TMEM199      | 0.264 |
| 549 | RC3H2     | 0.286 | 549 | CCNE1          | 0.309 | 549 | STX17     | 0.276 | 549 | SEMA3D       | 0.264 |
| 550 | GNL1      | 0.286 | 550 | EDNRB          | 0.309 | 550 | C7orf44   | 0.276 | 550 | SLC27A3      | 0.264 |
| 551 | PHB2      | 0.285 | 551 | MZT1           | 0.309 | 551 | TNFRSF19  | 0.276 | 551 | EXOSC8       | 0.264 |
| 552 | TWIST1    | 0.285 | 552 | FARSB          | 0.309 | 552 | GLCC1     | 0.276 | 552 | NRAS         | 0.264 |
| 553 | ID2       | 0.285 | 553 | ICA1L          | 0.309 | 553 | CCDC78    | 0.276 | 553 | SCGB3A2      | 0.263 |
| 554 | PHF10     | 0.285 | 554 | SNRPC          | 0.309 | 554 | ZCCHC18   | 0.276 | 554 | WHSC1L1      | 0.263 |
| 555 | RNF138    | 0.285 | 555 | EPHA5          | 0.309 | 555 | PLEKHM3   | 0.276 | 555 | XRCC5        | 0.263 |
| 556 | SLC6A5    | 0.285 | 556 | C1QB           | 0.308 | 556 | TRIM24    | 0.276 | 556 | NR2F6        | 0.263 |
| 557 | SFRP4     | 0.285 | 557 | COL11A1        | 0.308 | 557 | C14orf142 | 0.276 | 557 | NKRF         | 0.263 |
| 558 | HMGB1     | 0.285 | 558 | LRRC58         | 0.308 | 558 | PFDN6     | 0.275 | 558 | TOB1         | 0.263 |
| 559 | CUX1      | 0.285 | 559 | TIMM50         | 0.308 | 559 | C1orf35   | 0.275 | 559 | NDRG2        | 0.263 |
| 560 | CIZ1      | 0.284 | 560 | CEP192         | 0.308 | 560 | C5orf45   | 0.275 | 560 | RAC1         | 0.263 |
| 561 | EID3      | 0.284 | 561 | GALNTL1        | 0.308 | 561 | GSTA4     | 0.275 | 561 | PALM         | 0.263 |
| 562 | NOL12     | 0.284 | 562 | SLC39A6        | 0.308 | 562 | VAMP2     | 0.275 | 562 | DDX56        | 0.263 |
| 563 | DISC1     | 0.284 | 563 | RFC3           | 0.308 | 563 | DCAKD     | 0.275 | 563 | HOXA7        | 0.263 |
| 564 | GRIK1-AS1 | 0.284 | 564 | FGF7           | 0.308 | 564 | PLXNB1    | 0.275 | 564 | KAT8         | 0.262 |
| 565 | DNA2      | 0.284 | 565 | ATP7B          | 0.308 | 565 | SLC47A2   | 0.275 | 565 | CUX1         | 0.262 |
| 566 | SLC6A15   | 0.284 | 566 | S1PR5          | 0.307 | 566 | SERTM1    | 0.275 | 566 | SMPD2        | 0.262 |
| 567 | C9orf4    | 0.284 | 567 | PPP1R15B       | 0.307 | 567 | DLG3      | 0.275 | 567 | MIPEP        | 0.262 |
| 568 | SLC25A30  | 0.284 | 568 | YAE1D1         | 0.307 | 568 | DNA2      | 0.275 | 568 | CCP110       | 0.262 |
| 569 | C20orf7   | 0.284 | 569 | GRIK1-AS1      | 0.307 | 569 | IAPP      | 0.275 | 569 | HIST1H1D     | 0.262 |
| 570 | HHEX      | 0.283 | 570 | USP9X          | 0.307 | 570 | DMXL2     | 0.275 | 570 | EEF1A1       | 0.262 |
| 571 | PART1     | 0.283 | 571 | UQCR10         | 0.307 | 571 | GABRD     | 0.275 | 571 | HOXC13       | 0.262 |
| 572 | SAE1      | 0.283 | 572 | ARID1B         | 0.307 | 572 | ULK2      | 0.274 | 572 | GNRH2        | 0.262 |
| 573 | COX20     | 0.283 | 573 | LOC100507739   | 0.306 | 573 | CLUL1     | 0.274 | 573 | RBM38        | 0.262 |
| 574 | METTL9    | 0.283 | 574 | CHST10         | 0.306 | 574 | HNRNPF    | 0.274 | 574 | OR10H2       | 0.262 |
| 575 | AFG3L2    | 0.283 | 575 | ZIC3           | 0.306 | 575 | DENND1A   | 0.274 | 575 | EID3         | 0.262 |
| 576 | LYRM7     | 0.283 | 576 | PGAP1          | 0.306 | 576 | EHMT1     | 0.274 | 576 | LOC100131733 | 0.262 |
| 577 | 40058     | 0.283 | 577 | TUBB2A         | 0.306 | 577 | HHATL     | 0.274 | 577 | PRTG         | 0.262 |
| 578 | SRSF3     | 0.282 | 578 | FERD3L         | 0.306 | 578 | GALR2     | 0.274 | 578 | PHIP         | 0.262 |
| 579 | TRMT11    | 0.282 | 579 | CELA3A         | 0.306 | 579 | FAM49A    | 0.273 | 579 | EN1          | 0.262 |
| 580 | NRG2      | 0.282 | 580 | GTF2A1         | 0.306 | 580 | ZNF510    | 0.273 | 580 | FBN2         | 0.261 |
| 581 | DTNBP1    | 0.282 | 581 | RP9            | 0.306 | 581 | TSN       | 0.273 | 581 | LPHN3        | 0.261 |
| 582 | SDCCAG8   | 0.282 | 582 | UBE2A          | 0.305 | 582 | C14orf93  | 0.273 | 582 | SCARA5       | 0.261 |
| 583 | CLCA4     | 0.282 | 583 | ZNF343         | 0.305 | 583 | FAXC      | 0.273 | 583 | FOXH1        | 0.261 |
| 584 | GLRA2     | 0.282 | 584 | NEDD4          | 0.305 | 584 | LRRTM2    | 0.273 | 584 | PABPC1L      | 0.261 |
| 585 | C9orf29   | 0.282 | 585 | CDAN1          | 0.305 | 585 | TRIL      | 0.273 | 585 | CCDC90A      | 0.261 |
| 586 | LY6G6D    | 0.282 | 586 | SLC18A3        | 0.305 | 586 | RPRM      | 0.273 | 586 | PLXNB1       | 0.261 |
| 587 | POLE3     | 0.282 | 587 | KLHL10         | 0.304 | 587 | TBC1D7    | 0.272 | 587 | MCCC1        | 0.261 |
| 588 | BEND4     | 0.282 | 588 | ARMCX5-GPRASP2 | 0.304 | 588 | CEP192    | 0.272 | 588 | GRIK1-AS1    | 0.261 |
| 589 | INHBC     | 0.282 | 589 | PDS5B          | 0.304 | 589 | HLCS      | 0.272 | 589 | TMEM198      | 0.261 |
| 590 | SMCHD1    | 0.282 | 590 | LIMS1          | 0.304 | 590 | SYNE2     | 0.272 | 590 | VAMP2        | 0.261 |
| 591 | GALNT13   | 0.282 | 591 | SEC22C         | 0.304 | 591 | SLTM      | 0.272 | 591 | KIAA0895     | 0.260 |

|     |           |       |     |              |       |     |                |       |     |         |       |
|-----|-----------|-------|-----|--------------|-------|-----|----------------|-------|-----|---------|-------|
| 592 | HNRNPA0   | 0.281 | 592 | GNL3L        | 0.304 | 592 | RNF157         | 0.272 | 592 | DMXL2   | 0.260 |
| 593 | LOC151658 | 0.281 | 593 | NLRP8        | 0.304 | 593 | CIB2           | 0.272 | 593 | ABHD16A | 0.260 |
| 594 | TPRXL     | 0.281 | 594 | PARPBP       | 0.304 | 594 | CAMSAP2        | 0.271 | 594 | TREML1  | 0.260 |
| 595 | RPL27A    | 0.281 | 595 | FBXO10       | 0.304 | 595 | GNMT           | 0.271 | 595 | CAMSAP2 | 0.260 |
| 596 | ACBD6     | 0.281 | 596 | CRMP1        | 0.304 | 596 | PSIP1          | 0.271 | 596 | CSDC2   | 0.260 |
| 597 | DCTPP1    | 0.281 | 597 | ENY2         | 0.304 | 597 | PHF10          | 0.271 | 597 | RBMX    | 0.260 |
| 598 | TCF20     | 0.281 | 598 | ACTC1        | 0.304 | 598 | ZNF192         | 0.271 | 598 | ACAD9   | 0.260 |
| 599 | ATCAY     | 0.281 | 599 | HOXA11       | 0.304 | 599 | MTMR8          | 0.270 |     |         |       |
| 600 | NKRF      | 0.281 | 600 | MORF4L1      | 0.304 | 600 | WFDC1          | 0.270 |     |         |       |
| 601 | BYSL      | 0.281 | 601 | PDXP         | 0.304 | 601 | C9orf4         | 0.270 |     |         |       |
| 602 | MTOR      | 0.281 | 602 | HOTAIR       | 0.303 | 602 | CARHSP1        | 0.270 |     |         |       |
| 603 | CEP192    | 0.281 | 603 | KCTD20       | 0.303 | 603 | TCF25          | 0.270 |     |         |       |
| 604 | TSHZ1     | 0.280 | 604 | KCTD7        | 0.303 | 604 | LIG1           | 0.270 |     |         |       |
| 605 | KDM1B     | 0.280 | 605 | NUSAP1       | 0.303 | 605 | TMEM169        | 0.270 |     |         |       |
| 606 | DGCR9     | 0.280 | 606 | LATS1        | 0.303 | 606 | GALR3          | 0.270 |     |         |       |
| 607 | TMEM107   | 0.280 | 607 | RABL5        | 0.303 | 607 | SMAD9          | 0.270 |     |         |       |
| 608 | SRI       | 0.280 | 608 | ALPK2        | 0.303 | 608 | TRMU           | 0.269 |     |         |       |
| 609 | ABCB6     | 0.280 | 609 | BCL7C        | 0.303 | 609 | FBXW7          | 0.269 |     |         |       |
| 610 | SEC31B    | 0.280 | 610 | HDAC8        | 0.302 | 610 | KRT5           | 0.269 |     |         |       |
| 611 | ORC5      | 0.280 | 611 | ZNF565       | 0.302 | 611 | RCBTB1         | 0.269 |     |         |       |
| 612 | TSPAN7    | 0.280 | 612 | PLCG1        | 0.302 | 612 | KLHDC9         | 0.269 |     |         |       |
| 613 | SHMT1     | 0.280 | 613 | LOC100507654 | 0.302 | 613 | AATK           | 0.269 |     |         |       |
| 614 | WDR61     | 0.280 | 614 | NCAPG2       | 0.302 | 614 | C6orf47        | 0.269 |     |         |       |
| 615 | FBXO9     | 0.279 | 615 | ADSL         | 0.302 | 615 | ZNF775         | 0.269 |     |         |       |
| 616 | SYBU      | 0.279 | 616 | SYBU         | 0.302 | 616 | KCTD20         | 0.269 |     |         |       |
| 617 | ZMYND19   | 0.279 | 617 | SESN1        | 0.302 | 617 | SVOP           | 0.269 |     |         |       |
| 618 | TMEM151B  | 0.279 | 618 | RABEPK       | 0.302 | 618 | ARMCX5-GPRASP2 | 0.269 |     |         |       |
| 619 | IGLV5-45  | 0.279 | 619 | DLK1         | 0.302 | 619 | MRPL44         | 0.269 |     |         |       |
| 620 | SLC35B4   | 0.279 | 620 | HOXC8        | 0.302 | 620 | H2AFY          | 0.269 |     |         |       |
| 621 | BRP44     | 0.279 | 621 | ZNF24        | 0.302 | 621 | POU2F1         | 0.269 |     |         |       |
| 622 | IWS1      | 0.279 | 622 | LRP4         | 0.301 | 622 | NCBP1          | 0.268 |     |         |       |
| 623 | PTCHD2    | 0.279 | 623 | CEP78        | 0.301 | 623 | DCTPP1         | 0.268 |     |         |       |
| 624 | SYNCRIP   | 0.279 | 624 | MTCP1NB      | 0.301 | 624 | CCDC88C        | 0.268 |     |         |       |
| 625 | WDR17     | 0.279 | 625 | NRCAM        | 0.301 | 625 | TBX1           | 0.268 |     |         |       |
| 626 | MFF       | 0.279 | 626 | RMI1         | 0.301 | 626 | TRAF3IP2-AS1   | 0.268 |     |         |       |
| 627 | TCF4      | 0.279 | 627 | WTIP         | 0.301 | 627 | CREBBP         | 0.268 |     |         |       |
| 628 | MAK       | 0.279 | 628 | GATA4        | 0.301 | 628 | SECISBP2       | 0.268 |     |         |       |
| 629 | TUB       | 0.279 | 629 | ERAL1        | 0.301 | 629 | RPL27A         | 0.268 |     |         |       |
| 630 | PSMA4     | 0.279 | 630 | TMEM151B     | 0.301 | 630 | TSHZ1          | 0.267 |     |         |       |
| 631 | SULF2     | 0.279 | 631 | PPIL1        | 0.301 | 631 | HIP1           | 0.267 |     |         |       |
| 632 | RAVER2    | 0.279 | 632 | TAF5         | 0.301 | 632 | REEP2          | 0.267 |     |         |       |
| 633 | LINC00277 | 0.279 | 633 | CENPV        | 0.300 | 633 | AP4E1          | 0.267 |     |         |       |
| 634 | HDC       | 0.279 | 634 | RARS2        | 0.300 | 634 | SULF1          | 0.267 |     |         |       |
| 635 | 39872     | 0.279 | 635 | NDUFAF4      | 0.300 | 635 | DLX3           | 0.267 |     |         |       |
| 636 | TOMM5     | 0.279 | 636 | PTGR2        | 0.300 | 636 | LOC100506629   | 0.267 |     |         |       |
| 637 | DLD       | 0.279 | 637 | CDC7         | 0.300 | 637 | NPTX2          | 0.267 |     |         |       |
| 638 | MTR       | 0.278 | 638 | CAPN7        | 0.300 | 638 | KCNC1          | 0.267 |     |         |       |
| 639 | MARK4     | 0.278 | 639 | SLMO1        | 0.300 | 639 | TARDBP         | 0.267 |     |         |       |
| 640 | LUC7L2    | 0.278 | 640 | APITD1       | 0.300 | 640 | NELL2          | 0.267 |     |         |       |
| 641 | PYCR2     | 0.278 | 641 | SAMD14       | 0.300 | 641 | LINC00324      | 0.266 |     |         |       |
| 642 | PPP1R16B  | 0.278 | 642 | PES1         | 0.300 | 642 | CDH24          | 0.266 |     |         |       |
| 643 | RBM45     | 0.278 | 643 | ZFR          | 0.300 | 643 | PRRC2B         | 0.266 |     |         |       |
| 644 | FANCL     | 0.278 | 644 | C19orf12     | 0.299 | 644 | ARHGAP35       | 0.266 |     |         |       |
| 645 | CTRB2     | 0.278 | 645 | CHAT         | 0.299 | 645 | MFHAS1         | 0.266 |     |         |       |

|     |              |       |     |              |       |     |              |       |
|-----|--------------|-------|-----|--------------|-------|-----|--------------|-------|
| 646 | ZNF513       | 0.278 | 646 | NAA60        | 0.299 | 646 | C3orf70      | 0.266 |
| 647 | XRCC5        | 0.278 | 647 | HOXC13       | 0.299 | 647 | C2orf70      | 0.266 |
| 648 | ZBTB5        | 0.277 | 648 | TRO          | 0.299 | 648 | HYAL4        | 0.266 |
| 649 | THAP9        | 0.277 | 649 | THAP4        | 0.299 | 649 | PCDH8        | 0.266 |
| 650 | TAF5L        | 0.277 | 650 | IL17F        | 0.299 | 650 | POLD2        | 0.266 |
| 651 | GYG2         | 0.277 | 651 | EXOSC8       | 0.298 | 651 | EMD          | 0.265 |
| 652 | ATP5J        | 0.277 | 652 | THAP9        | 0.298 | 652 | MOAP1        | 0.265 |
| 653 | AP3M1        | 0.277 | 653 | TEKT2        | 0.298 | 653 | SLC6A8       | 0.265 |
| 654 | TP63         | 0.277 | 654 | METTL8       | 0.298 | 654 | SHROOM1      | 0.265 |
| 655 | KIAA1704     | 0.277 | 655 | ZRANB3       | 0.297 | 655 | DNALI1       | 0.265 |
| 656 | NONO         | 0.277 | 656 | RPRD1A       | 0.297 | 656 | FAM122B      | 0.265 |
| 657 | EIF4E2       | 0.277 | 657 | NQO2         | 0.297 | 657 | MTMR9        | 0.265 |
| 658 | CIC          | 0.276 | 658 | QRSL1        | 0.297 | 658 | LIMK2        | 0.265 |
| 659 | OSR2         | 0.276 | 659 | MTCH2        | 0.297 | 659 | OSR2         | 0.265 |
| 660 | C9orf116     | 0.276 | 660 | ENOX1        | 0.297 | 660 | PCK2         | 0.265 |
| 661 | SEMA3D       | 0.276 | 661 | U2AF1        | 0.296 | 661 | UBE2N        | 0.265 |
| 662 | RAI1         | 0.276 | 662 | PIGX         | 0.296 | 662 | KIF1A        | 0.265 |
| 663 | KIFC1        | 0.276 | 663 | GLRX2        | 0.296 | 663 | SKA3         | 0.265 |
| 664 | SRP14        | 0.276 | 664 | C6orf165     | 0.296 | 664 | SLC22A9      | 0.264 |
| 665 | SLC7A5       | 0.276 | 665 | TNNT3        | 0.296 | 665 | NHP2L1       | 0.264 |
| 666 | SIGLECP3     | 0.276 | 666 | RAC3         | 0.296 | 666 | HBBP1        | 0.264 |
| 667 | DLX4         | 0.276 | 667 | GLRA2        | 0.296 | 667 | C16orf53     | 0.264 |
| 668 | LOC100506388 | 0.275 | 668 | COL4A6       | 0.296 | 668 | TRAPPC2      | 0.264 |
| 669 | SLC47A1      | 0.275 | 669 | TRAF3IP1     | 0.296 | 669 | LOC146336    | 0.264 |
| 670 | FASTKD5      | 0.275 | 670 | FKBP5        | 0.296 | 670 | CCDC101      | 0.264 |
| 671 | CCAR1        | 0.275 | 671 | MED29        | 0.296 | 671 | DLL1         | 0.264 |
| 672 | UBA2         | 0.275 | 672 | FAM215A      | 0.296 | 672 | LOC100505760 | 0.264 |
| 673 | PRPF19       | 0.275 | 673 | TAF15        | 0.296 | 673 | SRP14        | 0.264 |
| 674 | R3HDM1       | 0.275 | 674 | RNF187       | 0.296 | 674 | PNMT         | 0.264 |
| 675 | DMXL2        | 0.275 | 675 | DTNBP1       | 0.296 | 675 | C9orf29      | 0.264 |
| 676 | LOC100507194 | 0.275 | 676 | SPP1         | 0.296 | 676 | SOX4         | 0.263 |
| 677 | LPHN3        | 0.275 | 677 | AMZ2P1       | 0.296 | 677 | DPYSL4       | 0.263 |
| 678 | ALDH5A1      | 0.275 | 678 | LRRC57       | 0.295 | 678 | SLC22A17     | 0.263 |
| 679 | HAUS2        | 0.275 | 679 | RNASEH2B     | 0.295 | 679 | CDK5R2       | 0.263 |
| 680 | DTYMK        | 0.275 | 680 | CUTC         | 0.295 | 680 | ZDHHC4       | 0.263 |
| 681 | MMP19        | 0.274 | 681 | BEND4        | 0.295 | 681 | PA2G4        | 0.263 |
| 682 | CUTA         | 0.274 | 682 | NHSL1        | 0.295 | 682 | LOC100506802 | 0.263 |
| 683 | GPR182       | 0.274 | 683 | RIC8B        | 0.295 | 683 | TIA1         | 0.263 |
| 684 | TRA2B        | 0.274 | 684 | PHLPP2       | 0.295 | 684 | WRB          | 0.263 |
| 685 | SOX18        | 0.274 | 685 | TROVE2       | 0.295 | 685 | HOXC6        | 0.263 |
| 686 | DAPK2        | 0.274 | 686 | LOC401588    | 0.295 | 686 | VAPB         | 0.263 |
| 687 | FOXD1        | 0.274 | 687 | EIF5A2       | 0.294 | 687 | KIRREL2      | 0.263 |
| 688 | GPR61        | 0.273 | 688 | CCDC77       | 0.294 | 688 | TMEM18       | 0.263 |
| 689 | LHFPL4       | 0.273 | 689 | C9orf50      | 0.294 | 689 | ELL3         | 0.263 |
| 690 | OR51B6       | 0.273 | 690 | ASPM         | 0.294 | 690 | HNRNPA2B1    | 0.262 |
| 691 | ZNF271       | 0.273 | 691 | C5orf24      | 0.294 | 691 | DPY19L3      | 0.262 |
| 692 | RHEB         | 0.273 | 692 | RNF114       | 0.294 | 692 | RBM34        | 0.262 |
| 693 | ALG1         | 0.273 | 693 | SCML2        | 0.294 | 693 | CPT2         | 0.262 |
| 694 | SRY          | 0.273 | 694 | LOC100506874 | 0.294 | 694 | RAC1         | 0.262 |
| 695 | ELK1         | 0.273 | 695 | BTRC         | 0.294 | 695 | HDLBP        | 0.262 |
| 696 | REEP1        | 0.273 | 696 | CHPT1        | 0.294 | 696 | PRSS16       | 0.262 |
| 697 | C16orf87     | 0.272 | 697 | API5         | 0.294 | 697 | ARHGAP19     | 0.262 |
| 698 | ABCC5        | 0.272 | 698 | CHD5         | 0.294 | 698 | PSMC2        | 0.262 |
| 699 | RSL24D1      | 0.272 | 699 | CAP2         | 0.294 | 699 | RNF20        | 0.262 |

|     |              |       |     |              |       |     |           |       |
|-----|--------------|-------|-----|--------------|-------|-----|-----------|-------|
| 700 | CBS          | 0.272 | 700 | COPS8        | 0.294 | 700 | GABRR1    | 0.262 |
| 701 | NT5DC2       | 0.272 | 701 | THAP5        | 0.294 | 701 | RELL2     | 0.261 |
| 702 | FH           | 0.272 | 702 | ANK2         | 0.293 | 702 | RPL13     | 0.261 |
| 703 | PDHA1        | 0.272 | 703 | MRPS31       | 0.293 | 703 | HMX2      | 0.261 |
| 704 | FOXH1        | 0.272 | 704 | ZCCHC12      | 0.293 | 704 | KIF11     | 0.261 |
| 705 | TBCE         | 0.272 | 705 | HBBP1        | 0.293 | 705 | C21orf33  | 0.261 |
| 706 | STON1        | 0.272 | 706 | BMP6         | 0.293 | 706 | TIMM17B   | 0.261 |
| 707 | RND2         | 0.272 | 707 | SNRNP48      | 0.292 | 707 | ALDH5A1   | 0.261 |
| 708 | OLFM2        | 0.272 | 708 | UNG          | 0.292 | 708 | CDK19     | 0.261 |
| 709 | MRPS9        | 0.272 | 709 | CXorf56      | 0.292 | 709 | PIRT      | 0.260 |
| 710 | TRAF7        | 0.272 | 710 | MAPK11       | 0.292 | 710 | NUP62CL   | 0.260 |
| 711 | VANGL2       | 0.272 | 711 | MLST8        | 0.292 | 711 | GATS      | 0.260 |
| 712 | FAM161A      | 0.272 | 712 | U2AF1L4      | 0.292 | 712 | KDM1A     | 0.260 |
| 713 | NARG2        | 0.272 | 713 | RBM18        | 0.292 | 713 | CNTNAP2   | 0.260 |
| 714 | POU2F1       | 0.271 | 714 | SH2D6        | 0.292 | 714 | AIMP2     | 0.260 |
| 715 | CAND2        | 0.271 | 715 | SFRP4        | 0.291 | 715 | C14orf132 | 0.260 |
| 716 | LOC100144597 | 0.271 | 716 | NKX2-5       | 0.291 | 716 | PHF21B    | 0.260 |
| 717 | DDX49        | 0.271 | 717 | LOC100128139 | 0.291 |     |           |       |
| 718 | SNRPC        | 0.271 | 718 | WDR61        | 0.291 |     |           |       |
| 719 | FZD1         | 0.271 | 719 | ACO2         | 0.291 |     |           |       |
| 720 | CAMKMT       | 0.271 | 720 | AKR1C2       | 0.290 |     |           |       |
| 721 | GNAZ         | 0.271 | 721 | SERPINE2     | 0.290 |     |           |       |
| 722 | PHF6         | 0.271 | 722 | RMST         | 0.290 |     |           |       |
| 723 | MTO1         | 0.271 | 723 | FSD1L        | 0.290 |     |           |       |
| 724 | DHRS13       | 0.271 | 724 | CD79B        | 0.290 |     |           |       |
| 725 | ESCO2        | 0.271 | 725 | SLITRK5      | 0.290 |     |           |       |
| 726 | TRMT61B      | 0.270 | 726 | GSTM3        | 0.290 |     |           |       |
| 727 | NUP188       | 0.270 | 727 | FAM161A      | 0.290 |     |           |       |
| 728 | DNASE1L2     | 0.270 | 728 | C15orf2      | 0.289 |     |           |       |
| 729 | NDUFA5       | 0.270 | 729 | TXNL4A       | 0.289 |     |           |       |
| 730 | S1PR5        | 0.270 | 730 | C19orf76     | 0.289 |     |           |       |
| 731 | NDUFA8       | 0.270 | 731 | FOXD1        | 0.289 |     |           |       |
| 732 | SP4          | 0.270 | 732 | LOC100144597 | 0.289 |     |           |       |
| 733 | CXorf36      | 0.270 | 733 | PTPRN        | 0.289 |     |           |       |
| 734 | NDUFB10      | 0.270 | 734 | SNRPD2       | 0.289 |     |           |       |
| 735 | USP42        | 0.270 | 735 | SYP          | 0.289 |     |           |       |
| 736 | MCM8         | 0.270 | 736 | WDR41        | 0.289 |     |           |       |
| 737 | KANK1        | 0.270 | 737 | CRIP2        | 0.289 |     |           |       |
| 738 | FAM162B      | 0.270 | 738 | ZNF184       | 0.289 |     |           |       |
| 739 | TDRD3        | 0.269 | 739 | YY2          | 0.289 |     |           |       |
| 740 | COL4A6       | 0.269 | 740 | PLCB4        | 0.289 |     |           |       |
| 741 | SMARCE1      | 0.269 | 741 | C2orf76      | 0.289 |     |           |       |
| 742 | MOGAT2       | 0.269 | 742 | FANCI        | 0.289 |     |           |       |
| 743 | E2F3         | 0.269 | 743 | MEX3B        | 0.289 |     |           |       |
| 744 | PHIP         | 0.269 | 744 | GLE1         | 0.289 |     |           |       |
| 745 | LOC100507534 | 0.269 | 745 | WDR62        | 0.288 |     |           |       |
| 746 | MDGA1        | 0.269 | 746 | C2orf44      | 0.288 |     |           |       |
| 747 | ZNF346       | 0.269 | 747 | TWIST1       | 0.288 |     |           |       |
| 748 | SARM1        | 0.269 | 748 | PRPF4B       | 0.288 |     |           |       |
| 749 | SEPT7P2      | 0.269 | 749 | TUFM         | 0.288 |     |           |       |
| 750 | VASH2        | 0.269 | 750 | ARID2        | 0.288 |     |           |       |
| 751 | HRH3         | 0.269 | 751 | LINC00478    | 0.288 |     |           |       |
| 752 | NEFH         | 0.269 | 752 | KCNK3        | 0.287 |     |           |       |
| 753 | AP4E1        | 0.268 | 753 | PI15         | 0.287 |     |           |       |

|     |              |       |     |              |       |
|-----|--------------|-------|-----|--------------|-------|
| 754 | MRPS34       | 0.268 | 754 | C20orf27     | 0.287 |
| 755 | PHF2         | 0.268 | 755 | SLTM         | 0.287 |
| 756 | MRPS18A      | 0.268 | 756 | TATDN3       | 0.287 |
| 757 | DNAH8        | 0.268 | 757 | LBR          | 0.287 |
| 758 | FBXW2        | 0.268 | 758 | WNK3         | 0.287 |
| 759 | TARBP1       | 0.268 | 759 | MCM8         | 0.287 |
| 760 | NDUFS3       | 0.268 | 760 | LOC401324    | 0.287 |
| 761 | RUNDC3B      | 0.268 | 761 | ZNF546       | 0.287 |
| 762 | LOC100506995 | 0.268 | 762 | LOC339166    | 0.287 |
| 763 | C18orf56     | 0.268 | 763 | ZNF770       | 0.287 |
| 764 | DUS1L        | 0.268 | 764 | CRY1         | 0.287 |
| 765 | DZIP1        | 0.268 | 765 | INA          | 0.286 |
| 766 | NCOA1        | 0.268 | 766 | ZNF615       | 0.286 |
| 767 | ATP2B3       | 0.268 | 767 | TIMM17B      | 0.286 |
| 768 | SLC22A8      | 0.268 | 768 | HSBP1        | 0.286 |
| 769 | NCS1         | 0.268 | 769 | SH3BP5L      | 0.286 |
| 770 | PSMG3        | 0.267 | 770 | SH3GL3       | 0.285 |
| 771 | ANKRD26P3    | 0.267 | 771 | GNRH2        | 0.285 |
| 772 | XPO5         | 0.267 | 772 | SALL3        | 0.285 |
| 773 | LOC100506679 | 0.267 | 773 | RNFT2        | 0.285 |
| 774 | EID2         | 0.267 | 774 | MSRB3        | 0.285 |
| 775 | GNMT         | 0.267 | 775 | ZNF227       | 0.285 |
| 776 | CELSR2       | 0.267 | 776 | CKAP2        | 0.285 |
| 777 | MADCAM1      | 0.267 | 777 | RBM3         | 0.285 |
| 778 | NRM          | 0.266 | 778 | MBLAC2       | 0.285 |
| 779 | HIST1H1D     | 0.266 | 779 | NECAB2       | 0.285 |
| 780 | SESN1        | 0.266 | 780 | RPP40        | 0.285 |
| 781 | FZD3         | 0.266 | 781 | UNKL         | 0.284 |
| 782 | ZNF460       | 0.266 | 782 | PCDH10       | 0.284 |
| 783 | CACYBP       | 0.266 | 783 | NOSIP        | 0.284 |
| 784 | C6orf162     | 0.265 | 784 | NDUFAB1      | 0.284 |
| 785 | RELL2        | 0.265 | 785 | SOHLH1       | 0.284 |
| 786 | ASNS         | 0.265 | 786 | DIXDC1       | 0.284 |
| 787 | HFE2         | 0.265 | 787 | LANCL1       | 0.284 |
| 788 | MYBL2        | 0.265 | 788 | SMAD6        | 0.284 |
| 789 | GTF2F2       | 0.265 | 789 | SLC22A8      | 0.284 |
| 790 | CHRNB4       | 0.265 | 790 | HIST1H2AM    | 0.284 |
| 791 | RABEPK       | 0.265 | 791 | LOC100506679 | 0.284 |
| 792 | DECR2        | 0.265 | 792 | IAPP         | 0.284 |
| 793 | LOC730098    | 0.265 | 793 | TNFRSF4      | 0.284 |
| 794 | GLA          | 0.265 | 794 | ECEL1        | 0.283 |
| 795 | APITD1       | 0.265 | 795 | TYRP1        | 0.283 |
| 796 | TEK          | 0.264 | 796 | FMN2         | 0.283 |
| 797 | DSG3         | 0.264 | 797 | E2F3         | 0.283 |
| 798 | LCMT2        | 0.264 | 798 | PRTG         | 0.283 |
| 799 | ADCK2        | 0.264 | 799 | LOC100130275 | 0.283 |
| 800 | LOC100507654 | 0.264 | 800 | RANBP2       | 0.282 |
| 801 | SHISA8       | 0.264 | 801 | RND2         | 0.282 |
| 802 | UBE3A        | 0.264 | 802 | C18orf21     | 0.282 |
| 803 | SPHAR        | 0.264 | 803 | SF3A3        | 0.282 |
| 804 | CYP4F12      | 0.264 | 804 | HAUS6        | 0.282 |
| 805 | FTSJD2       | 0.263 | 805 | TTL          | 0.282 |
| 806 | KIAA1841     | 0.263 | 806 | TXN          | 0.282 |
| 807 | NDUFS1       | 0.263 | 807 | PHKA1        | 0.282 |

|     |           |       |     |           |       |
|-----|-----------|-------|-----|-----------|-------|
| 808 | NEFL      | 0.263 | 808 | KCNE1L    | 0.281 |
| 809 | UCK1      | 0.263 | 809 | ID3       | 0.281 |
| 810 | MRGPRX2   | 0.263 | 810 | CHRNA3    | 0.281 |
| 811 | PTH2      | 0.263 | 811 | DSCR6     | 0.281 |
| 812 | NOP56     | 0.263 | 812 | SMARCE1   | 0.281 |
| 813 | LOC255352 | 0.263 | 813 | EIF2B3    | 0.281 |
| 814 | LOC157627 | 0.263 | 814 | TMX3      | 0.281 |
| 815 | ZIM2      | 0.263 | 815 | UBE2V2    | 0.281 |
| 816 | ZNF324B   | 0.263 | 816 | ZNF584    | 0.281 |
| 817 | CAPN10    | 0.263 | 817 | SIKE1     | 0.281 |
| 818 | GNPAT     | 0.263 | 818 | PRKD1     | 0.281 |
| 819 | HDAC4     | 0.263 | 819 | NUP43     | 0.281 |
| 820 | HES6      | 0.262 | 820 | ATP5G1    | 0.281 |
| 821 | KRT6A     | 0.262 | 821 | SOD1      | 0.280 |
| 822 | RFC3      | 0.262 | 822 | PSMG4     | 0.280 |
| 823 | IBA57     | 0.262 | 823 | METTL4    | 0.280 |
| 824 | LRP3      | 0.262 | 824 | RNASEH1   | 0.280 |
| 825 | IL1F10    | 0.262 | 825 | LINC00052 | 0.280 |
| 826 | ITPA      | 0.262 | 826 | PANK1     | 0.280 |
| 827 | FBXL18    | 0.262 | 827 | FAM102B   | 0.280 |
| 828 | CD8A      | 0.262 | 828 | FLJ34503  | 0.279 |
| 829 | DDX59     | 0.262 | 829 | ACAA2     | 0.279 |
| 830 | SLC18A3   | 0.262 | 830 | KCNH7     | 0.279 |
| 831 | KCNJ12    | 0.262 | 831 | PZP       | 0.279 |
| 832 | DPY19L3   | 0.261 | 832 | NIPA1     | 0.279 |
| 833 | TTY12     | 0.261 | 833 | KLHL9     | 0.279 |
| 834 | GTF2I     | 0.261 | 834 | PIRT      | 0.279 |
| 835 | KCTD20    | 0.261 | 835 | G6PC2     | 0.279 |
| 836 | KCNH3     | 0.261 | 836 | TYMS      | 0.279 |
| 837 | NDUFA4    | 0.261 | 837 | C22orf40  | 0.279 |
| 838 | NUPL1     | 0.260 | 838 | FAM162B   | 0.279 |
| 839 | RPL35A    | 0.260 | 839 | ACBD6     | 0.279 |
|     |           |       | 840 | POLE3     | 0.278 |
|     |           |       | 841 | SERPINA7  | 0.278 |
|     |           |       | 842 | AIMP2     | 0.278 |
|     |           |       | 843 | EMD       | 0.278 |
|     |           |       | 844 | ALG13     | 0.278 |
|     |           |       | 845 | NELL2     | 0.278 |
|     |           |       | 846 | PSIP1     | 0.278 |
|     |           |       | 847 | AP1S2     | 0.278 |
|     |           |       | 848 | CCDC54    | 0.278 |
|     |           |       | 849 | LOC84856  | 0.278 |
|     |           |       | 850 | RRP15     | 0.278 |
|     |           |       | 851 | PCDH9     | 0.277 |
|     |           |       | 852 | GABRD     | 0.277 |
|     |           |       | 853 | TBX3      | 0.277 |
|     |           |       | 854 | EML1      | 0.277 |
|     |           |       | 855 | TLX1      | 0.277 |
|     |           |       | 856 | HNRNPU    | 0.277 |
|     |           |       | 857 | DTYMK     | 0.277 |
|     |           |       | 858 | MRPL35    | 0.277 |
|     |           |       | 859 | PPP3R2    | 0.277 |
|     |           |       | 860 | TAS2R41   | 0.277 |
|     |           |       | 861 | COL2A1    | 0.277 |

|     |           |       |
|-----|-----------|-------|
| 862 | AIFM1     | 0.277 |
| 863 | OSBPL6    | 0.277 |
| 864 | MIS18A    | 0.277 |
| 865 | WBSCR17   | 0.277 |
| 866 | NME4      | 0.277 |
| 867 | EHMT1     | 0.276 |
| 868 | ZNF235    | 0.276 |
| 869 | ODF2      | 0.276 |
| 870 | RUNDC3B   | 0.276 |
| 871 | GPRIN3    | 0.276 |
| 872 | MPDZ      | 0.276 |
| 873 | GALNT11   | 0.276 |
| 874 | PHF6      | 0.276 |
| 875 | UXT       | 0.276 |
| 876 | WRNIP1    | 0.276 |
| 877 | GRIA2     | 0.276 |
| 878 | SNRNP25   | 0.275 |
| 879 | STRBP     | 0.275 |
| 880 | TCTEX1D2  | 0.275 |
| 881 | NLGN4Y    | 0.275 |
| 882 | PKI55     | 0.275 |
| 883 | ZFYVE16   | 0.275 |
| 884 | CCL27     | 0.275 |
| 885 | FLT3      | 0.275 |
| 886 | FBXO11    | 0.275 |
| 887 | ELOVL2    | 0.275 |
| 888 | POLR1E    | 0.275 |
| 889 | CASC5     | 0.275 |
| 890 | C22orf39  | 0.275 |
| 891 | TMOD1     | 0.275 |
| 892 | GTF3C5    | 0.275 |
| 893 | RECK      | 0.275 |
| 894 | C1orf96   | 0.274 |
| 895 | TTF1      | 0.274 |
| 896 | ZNF471    | 0.274 |
| 897 | RPE       | 0.274 |
| 898 | LTV1      | 0.274 |
| 899 | GAB4      | 0.274 |
| 900 | RFK       | 0.274 |
| 901 | C22orf43  | 0.274 |
| 902 | SAC3D1    | 0.274 |
| 903 | C1QBP     | 0.274 |
| 904 | FBXO5     | 0.274 |
| 905 | ZBED1     | 0.274 |
| 906 | KCNH3     | 0.274 |
| 907 | CDH19     | 0.274 |
| 908 | CCDC104   | 0.274 |
| 909 | LOC157627 | 0.274 |
| 910 | CNRIP1    | 0.273 |
| 911 | KCTD3     | 0.273 |
| 912 | OPA3      | 0.273 |
| 913 | CMC2      | 0.273 |
| 914 | GNAT3     | 0.273 |
| 915 | DUT       | 0.273 |

|     |                |       |
|-----|----------------|-------|
| 916 | KIF3A          | 0.273 |
| 917 | NUDT10         | 0.273 |
| 918 | ATP2A1         | 0.273 |
| 919 | MAD2L1         | 0.273 |
| 920 | LOC100506995   | 0.273 |
| 921 | PIK3C2B        | 0.273 |
| 922 | WT1-AS         | 0.273 |
| 923 | CXorf26        | 0.273 |
| 924 | C18orf54       | 0.273 |
| 925 | NUDT19         | 0.272 |
| 926 | SLC35A4        | 0.272 |
| 927 | UCN3           | 0.272 |
| 928 | FCN1           | 0.272 |
| 929 | TRAF5          | 0.272 |
| 930 | ARHGAP19-SLIT1 | 0.272 |
| 931 | TNKS           | 0.272 |
| 932 | ENPP2          | 0.272 |
| 933 | RINT1          | 0.272 |
| 934 | NAA16          | 0.272 |
| 935 | KDM5C          | 0.272 |
| 936 | DCST1          | 0.272 |
| 937 | GRHPR          | 0.272 |
| 938 | TRMU           | 0.272 |
| 939 | LOC645321      | 0.272 |
| 940 | SYCP2L         | 0.272 |
| 941 | GREM2          | 0.271 |
| 942 | THAP8          | 0.271 |
| 943 | UPRT           | 0.271 |
| 944 | ZADH2          | 0.271 |
| 945 | FBXW2          | 0.271 |
| 946 | SUGP2          | 0.271 |
| 947 | TMEM199        | 0.271 |
| 948 | NUPL1          | 0.271 |
| 949 | SOCS6          | 0.271 |
| 950 | TAF2           | 0.271 |
| 951 | ZNF673         | 0.271 |
| 952 | HOXD-AS2       | 0.271 |
| 953 | PLCD4          | 0.271 |
| 954 | PTCHD2         | 0.271 |
| 955 | DBF4B          | 0.271 |
| 956 | CROT           | 0.270 |
| 957 | SLC6A15        | 0.270 |
| 958 | NONO           | 0.270 |
| 959 | HAUS2          | 0.270 |
| 960 | KIN            | 0.270 |
| 961 | DYDC2          | 0.270 |
| 962 | CRIP3          | 0.270 |
| 963 | IGFBP2         | 0.270 |
| 964 | EBF1           | 0.270 |
| 965 | HMGNA4         | 0.270 |
| 966 | C2orf47        | 0.270 |
| 967 | HDAC10         | 0.270 |
| 968 | LOC100507265   | 0.269 |
| 969 | RBBP7          | 0.269 |



|      |              |       |
|------|--------------|-------|
| 970  | PMCH         | 0.269 |
| 971  | BRD3         | 0.269 |
| 972  | ZNF675       | 0.269 |
| 973  | MIB1         | 0.269 |
| 974  | ULK2         | 0.269 |
| 975  | PRPS2        | 0.269 |
| 976  | FGF2         | 0.269 |
| 977  | DEK          | 0.268 |
| 978  | FBN2         | 0.268 |
| 979  | HBG2         | 0.268 |
| 980  | KIFAP3       | 0.268 |
| 981  | DDX59        | 0.268 |
| 982  | MBLAC1       | 0.268 |
| 983  | SLC9B2       | 0.268 |
| 984  | FAR1         | 0.268 |
| 985  | FLJ27352     | 0.268 |
| 986  | SMAD9        | 0.268 |
| 987  | SPC25        | 0.268 |
| 988  | QPCT         | 0.268 |
| 989  | TPM2         | 0.267 |
| 990  | ZNF219       | 0.267 |
| 991  | HJURP        | 0.267 |
| 992  | ARHGAP35     | 0.267 |
| 993  | PARN         | 0.267 |
| 994  | NEK3         | 0.267 |
| 995  | GNL1         | 0.267 |
| 996  | XYLB         | 0.267 |
| 997  | UBIAD1       | 0.267 |
| 998  | CST9         | 0.267 |
| 999  | LCE3D        | 0.267 |
| 1000 | TMEM177      | 0.267 |
| 1001 | ZNF280A      | 0.267 |
| 1002 | ZC3HC1       | 0.267 |
| 1003 | HNRNPH3      | 0.267 |
| 1004 | OSR2         | 0.267 |
| 1005 | ALG9         | 0.266 |
| 1006 | MRPS26       | 0.266 |
| 1007 | SMARCB1      | 0.266 |
| 1008 | C16orf45     | 0.266 |
| 1009 | SUGT1        | 0.266 |
| 1010 | MCTS1        | 0.266 |
| 1011 | KIAA1704     | 0.266 |
| 1012 | ABCB1        | 0.266 |
| 1013 | EFCAB7       | 0.266 |
| 1014 | SRP9         | 0.265 |
| 1015 | IFT81        | 0.265 |
| 1016 | MTX2         | 0.265 |
| 1017 | LIN37        | 0.265 |
| 1018 | MGC16025     | 0.265 |
| 1019 | CPA1         | 0.265 |
| 1020 | TAB1         | 0.265 |
| 1021 | IFRD1        | 0.265 |
| 1022 | COQ7         | 0.265 |
| 1023 | LOC100127983 | 0.264 |

|      |              |       |
|------|--------------|-------|
| 1024 | NUP210P1     | 0.264 |
| 1025 | KIF21A       | 0.264 |
| 1026 | PABPC4L      | 0.264 |
| 1027 | C1orf173     | 0.264 |
| 1028 | CENPI        | 0.264 |
| 1029 | SMC6         | 0.264 |
| 1030 | PPPDE1       | 0.264 |
| 1031 | C6orf228     | 0.264 |
| 1032 | MRPS14       | 0.264 |
| 1033 | ANP32A       | 0.264 |
| 1034 | FUNDC1       | 0.264 |
| 1035 | RBBP4        | 0.264 |
| 1036 | MRPL13       | 0.264 |
| 1037 | RBM20        | 0.263 |
| 1038 | ISCA1        | 0.263 |
| 1039 | TMPO         | 0.263 |
| 1040 | PHF21B       | 0.263 |
| 1041 | GHRHR        | 0.263 |
| 1042 | HDAC2        | 0.263 |
| 1043 | HTR3B        | 0.263 |
| 1044 | ATP5J2       | 0.263 |
| 1045 | PTDSS2       | 0.263 |
| 1046 | MAP2         | 0.263 |
| 1047 | POLR2F       | 0.263 |
| 1048 | HCCS         | 0.263 |
| 1049 | OPA1         | 0.263 |
| 1050 | C14orf2      | 0.263 |
| 1051 | SRI          | 0.263 |
| 1052 | TARDBP       | 0.263 |
| 1053 | LINC00282    | 0.262 |
| 1054 | ACER1        | 0.262 |
| 1055 | C17orf81     | 0.262 |
| 1056 | SNRPD1       | 0.262 |
| 1057 | ANKRD13B     | 0.262 |
| 1058 | DYNLT1       | 0.262 |
| 1059 | ANO7         | 0.262 |
| 1060 | ID1          | 0.262 |
| 1061 | CHORDC1      | 0.262 |
| 1062 | FAM98B       | 0.262 |
| 1063 | TRIML2       | 0.262 |
| 1064 | JOSD2        | 0.262 |
| 1065 | POLR2D       | 0.262 |
| 1066 | UCK1         | 0.262 |
| 1067 | UQCRC2       | 0.262 |
| 1068 | HR           | 0.262 |
| 1069 | HOXD9        | 0.261 |
| 1070 | C9orf4       | 0.261 |
| 1071 | CCNB1        | 0.261 |
| 1072 | LOC100506597 | 0.261 |
| 1073 | METTL15      | 0.261 |
| 1074 | RRP12        | 0.261 |
| 1075 | GPR52        | 0.261 |
| 1076 | DYX1C1       | 0.261 |
| 1077 | PABPC5       | 0.261 |

|      |              |       |
|------|--------------|-------|
| 1078 | LOC100506828 | 0.261 |
| 1079 | ZNF768       | 0.261 |
| 1080 | C16orf93     | 0.261 |
| 1081 | PQBP1        | 0.261 |
| 1082 | DPY19L2      | 0.261 |
| 1083 | LHX2         | 0.261 |
| 1084 | FAR2         | 0.261 |
| 1085 | PSMD10       | 0.261 |
| 1086 | ARHGAP11A    | 0.261 |
| 1087 | UCP3         | 0.261 |
| 1088 | ZC3H14       | 0.260 |
| 1089 | DEGS1        | 0.260 |
| 1090 | EIF2S3       | 0.260 |
| 1091 | TUBE1        | 0.260 |

Supplementary Table 2 - PHGDH copy number in NSCLC cell lines

| <u>Cell line</u> | <u>PHGDH copy #</u> | <u>Cell line</u> | <u>PHGDH copy #</u> |
|------------------|---------------------|------------------|---------------------|
| H1693            | 0.80218117          | H1568            | 2.46912521          |
| H650             | 1.33783482          | H1581            | 2.48165059          |
| H596             | 1.41539036          | H1437            | 2.49251122          |
| H1975            | 1.47120675          | PC9              | 2.55177301          |
| A549             | 1.47733806          | H446             | 2.57183841          |
| Hcc2935          | 1.48617087          | Hcc44            | 2.58613932          |
| Calu-3           | 1.49692299          | H1703            | 2.65866131          |
| H1755            | 1.52298317          | HCC1195          | 2.66881629          |
| H1395            | 1.59074215          | H1792            | 2.6896156           |
| H460             | 1.59526931          | H522             | 2.69670928          |
| Hcc1171          | 1.61250094          | H2087            | 2.83883697          |
| H2122            | 1.66612888          | H1869            | 3.03584893          |
| Hcc2279          | 1.68225919          | H647             | 3.22209716          |
| Calu-6           | 1.68692987          | Hcc366           | 3.3689523           |
| H2347            | 1.68845063          | H2172            | 3.51591453          |
| H2228            | 1.70751707          | H838             | 4.2251425           |
| H1373            | 1.74303314          |                  |                     |
| H1648            | 1.74508825          |                  |                     |
| H1355            | 1.74629828          |                  |                     |
| H2009            | 1.76810016          |                  |                     |
| H322             | 1.77817831          |                  |                     |
| H1299            | 1.78052168          |                  |                     |
| HCC95            | 1.83999265          |                  |                     |
| Hcc4006          | 1.84101324          |                  |                     |
| H1944            | 1.87826419          |                  |                     |
| H1915            | 1.9121557           |                  |                     |
| H2126            | 1.92398827          |                  |                     |
| H1155            | 1.98384595          |                  |                     |
| H2030            | 2.00722174          |                  |                     |
| H1650            | 2.08117748          |                  |                     |
| H2405            | 2.1178494           |                  |                     |
| H2291            | 2.14860458          |                  |                     |
| Calu-1           | 2.19755611          |                  |                     |
| H2170            | 2.20763245          |                  |                     |
| Hcc15            | 2.26466868          |                  |                     |
| Hcc827           | 2.27379155          |                  |                     |
| H2023            | 2.32430598          |                  |                     |
| Hcc1897          | 2.42183403          |                  |                     |
| H810             | 2.44020102          |                  |                     |
| H358             | 2.45513099          |                  |                     |

Supplementary Table 3 - NRF2 score and CCLE gene expression data for NSCLC cell lines

| NRF2 score | Description   | NQO1  | GCLC  | GCLM  | SLC7A11 | AKR1C1 | PHGDH | PSAT1 | PSPH  | SHMT1 | SHMT2 |
|------------|---------------|-------|-------|-------|---------|--------|-------|-------|-------|-------|-------|
| 1.55       | A549_LUNG     | 13.24 | 11.17 | 11.07 | 11.12   | 13.07  | 7.98  | 11.45 | 9.18  | 7.94  | 9.67  |
| 0.87       | CALU1_LUNG    | 11.31 | 6.08  | 9.80  | 8.77    | 8.21   | 7.54  | 10.27 | 8.38  | 7.34  | 9.32  |
| 1.13       | CALU3_LUNG    | 11.82 | 10.30 | 8.98  | 10.73   | 9.09   | 8.71  | 9.61  | 8.87  | 7.55  | 10.07 |
| 0.90       | CALU6_LUNG    | 11.62 | 8.64  | 7.77  | 8.75    | 7.62   | 9.52  | 10.82 | 6.27  | 8.63  | 10.30 |
| 0.83       | HCC1171_LUNG  | 12.15 | 9.35  | 8.90  | 8.97    | 3.92   | 6.44  | 10.18 | 8.84  | 7.02  | 9.39  |
| 0.89       | HCC1195_LUNG  | 11.24 | 10.81 | 8.76  | 8.65    | 5.09   | 5.91  | 10.55 | 8.75  | 7.12  | 9.95  |
| 1.63       | HCC15_LUNG    | 13.79 | 12.56 | 10.67 | 10.63   | 12.00  | 9.03  | 10.26 | 8.46  | 8.25  | 9.64  |
| 0.98       | HCC1588_LUNG  | 12.32 | 10.90 | 9.13  | 10.11   | 5.92   | 9.43  | 12.24 | 9.96  | 6.30  | 10.52 |
| 0.79       | HCC1833_LUNG  | 12.26 | 9.88  | 12.17 | 9.38    | 4.56   | 4.58  | 9.63  | 8.60  | 6.97  | 9.98  |
| 1.02       | HCC1897_LUNG  | 12.90 | 10.18 | 9.72  | 8.41    | 7.51   | 5.84  | 8.60  | 7.75  | 7.05  | 9.45  |
| 0.86       | HCC2108_LUNG  | 11.62 | 8.92  | 9.60  | 8.25    | 3.99   | 5.84  | 9.83  | 8.68  | 6.96  | 9.25  |
| 0.82       | HCC2279_LUNG  | 10.68 | 10.99 | 10.16 | 8.41    | 4.26   | 7.39  | 9.86  | 9.70  | 7.21  | 8.99  |
| 1.53       | HCC2814_LUNG  | 13.49 | 11.12 | 10.10 | 10.69   | 14.19  | 8.51  | 10.48 | 8.86  | 8.63  | 9.27  |
| 0.95       | HCC2935_LUNG  | 12.03 | 11.38 | 8.80  | 8.44    | 5.34   | 7.71  | 11.23 | 9.27  | 7.64  | 8.20  |
| 0.80       | HCC366_LUNG   | 11.71 | 11.04 | 10.87 | 9.60    | 3.92   | 8.35  | 10.59 | 8.97  | 5.69  | 8.65  |
| 0.83       | HCC4006_LUNG  | 11.55 | 10.72 | 8.93  | 8.32    | 4.67   | 8.49  | 10.79 | 11.00 | 7.74  | 9.26  |
| 1.13       | HCC44_LUNG    | 12.42 | 10.45 | 10.38 | 11.33   | 9.18   | 7.87  | 11.23 | 8.91  | 6.33  | 10.41 |
| 0.86       | HCC827_LUNG   | 11.10 | 9.33  | 10.14 | 7.72    | 4.48   | 6.87  | 10.87 | 10.52 | 8.09  | 10.26 |
| 1.54       | HCC95_LUNG    | 12.82 | 13.15 | 12.10 | 11.24   | 14.11  | 9.50  | 11.32 | 10.19 | 7.90  | 9.72  |
| 0.78       | NCIH1155_LUNG | 10.87 | 8.59  | 9.20  | 8.08    | 4.61   | 10.05 | 11.13 | 8.67  | 7.44  | 10.01 |
| 0.93       | NCIH1299_LUNG | 11.02 | 8.70  | 9.63  | 7.19    | 4.64   | 8.50  | 11.35 | 8.40  | 7.50  | 9.66  |
| 1.56       | NCIH1355_LUNG | 13.18 | 10.42 | 10.79 | 10.98   | 13.84  | 7.22  | 10.62 | 8.28  | 7.54  | 9.98  |
| 1.06       | NCIH1373_LUNG | 12.89 | 13.54 | 9.67  | 11.20   | 8.35   | 8.35  | 10.45 | 7.44  | 7.16  | 9.24  |
| 1.13       | NCIH1395_LUNG | 11.95 | 8.87  | 9.69  | 8.76    | 7.89   | 6.78  | 10.92 | 7.80  | 7.52  | 10.65 |
| 1.65       | NCIH1437_LUNG | 13.88 | 9.51  | 11.71 | 10.20   | 14.78  | 10.30 | 10.56 | 7.92  | 7.93  | 10.33 |
| 0.88       | NCIH1568_LUNG | 11.43 | 9.42  | 9.37  | 7.89    | 4.30   | 9.60  | 9.80  | 8.36  | 7.38  | 9.40  |
| 0.85       | NCIH1581_LUNG | 10.82 | 9.04  | 8.68  | 8.07    | 5.45   | 8.25  | 9.75  | 9.02  | 7.01  | 9.28  |
| 1.47       | NCIH1648_LUNG | 12.09 | 9.83  | 10.06 | 10.61   | 10.83  | 7.68  | 9.17  | 8.32  | 7.39  | 9.74  |
| 0.81       | NCIH1650_LUNG | 12.43 | 8.82  | 9.48  | 8.58    | 4.59   | 9.19  | 10.99 | 8.65  | 7.76  | 8.72  |
| 0.85       | NCIH1693_LUNG | 9.82  | 9.33  | 9.68  | 7.93    | 4.09   | 7.02  | 10.55 | 8.65  | 6.87  | 9.88  |
| 0.89       | NCIH1703_LUNG | 12.93 | 9.29  | 10.11 | 10.12   | 4.79   | 10.21 | 12.50 | 9.72  | 7.55  | 9.52  |
| 1.50       | NCIH1792_LUNG | 12.91 | 11.04 | 10.02 | 11.60   | 13.46  | 8.44  | 10.58 | 7.31  | 6.74  | 9.02  |
| 0.97       | NCIH1869_LUNG | 12.85 | 12.48 | 11.15 | 9.37    | 8.37   | 9.61  | 11.27 | 9.65  | 7.43  | 9.88  |
| 1.20       | NCIH1915_LUNG | 12.22 | 10.36 | 11.64 | 9.67    | 9.25   | 8.89  | 10.83 | 9.62  | 7.38  | 9.74  |
| 1.74       | NCIH1944_LUNG | 13.05 | 10.80 | 12.07 | 11.71   | 14.21  | 7.37  | 10.56 | 8.51  | 7.54  | 9.49  |
| 0.93       | NCIH1975_LUNG | 11.59 | 8.95  | 8.82  | 7.08    | 5.00   | 8.06  | 10.20 | 9.02  | 8.60  | 10.29 |
| 0.87       | NCIH2009_LUNG | 12.63 | 10.78 | 10.87 | 8.85    | 4.75   | 7.91  | 10.79 | 8.82  | 7.75  | 8.95  |
| 1.70       | NCIH2023_LUNG | 13.05 | 11.89 | 11.52 | 10.86   | 13.89  | 7.75  | 10.91 | 8.52  | 7.18  | 9.12  |
| 1.40       | NCIH2030_LUNG | 13.38 | 9.57  | 10.08 | 10.04   | 10.57  | 5.62  | 4.31  | 7.33  | 6.80  | 9.13  |
| 0.99       | NCIH2087_LUNG | 12.66 | 12.20 | 10.49 | 9.82    | 5.61   | 10.68 | 11.00 | 8.36  | 9.08  | 10.61 |
| 1.79       | NCIH2122_LUNG | 13.15 | 11.82 | 11.48 | 12.14   | 14.42  | 9.31  | 11.91 | 9.31  | 8.50  | 10.83 |
| 1.09       | NCIH2126_LUNG | 12.18 | 10.72 | 8.64  | 10.59   | 6.18   | 8.39  | 10.28 | 7.76  | 7.15  | 8.96  |
| 1.47       | NCIH2170_LUNG | 13.60 | 11.49 | 10.54 | 11.08   | 13.60  | 9.71  | 11.58 | 9.36  | 8.10  | 9.26  |
| 1.45       | NCIH2172_LUNG | 13.26 | 11.82 | 10.63 | 10.34   | 12.25  | 7.97  | 10.40 | 9.24  | 6.43  | 8.65  |
| 1.51       | NCIH2228_LUNG | 13.74 | 11.81 | 10.82 | 10.39   | 13.41  | 8.38  | 10.72 | 8.40  | 7.70  | 9.56  |
| 0.85       | NCIH2291_LUNG | 11.97 | 9.08  | 9.27  | 9.37    | 6.30   | 6.54  | 11.63 | 8.80  | 6.30  | 9.48  |
| 0.90       | NCIH2347_LUNG | 11.72 | 9.57  | 9.45  | 8.44    | 6.26   | 5.84  | 9.82  | 6.79  | 6.18  | 9.20  |
| 1.29       | NCIH2405_LUNG | 12.50 | 10.95 | 8.86  | 9.82    | 11.15  | 6.97  | 8.64  | 8.65  | 6.11  | 8.67  |
| 1.25       | NCIH322_LUNG  | 13.17 | 11.60 | 9.96  | 11.12   | 6.16   | 7.79  | 6.06  | 7.62  | 7.50  | 9.09  |

| NRF2  |               |        |        |         |           |         |         |       |        |       |
|-------|---------------|--------|--------|---------|-----------|---------|---------|-------|--------|-------|
| score | Description   | AKR1C2 | AKR1C3 | AKR1B10 | LOC344887 | CYP4F11 | ALDH3A1 | SPP1  | OSGIN1 | PGD   |
| 1.55  | A549_LUNG     | 14.70  | 14.03  | 14.27   | 7.55      | 7.69    | 10.48   | 12.47 | 7.71   | 12.32 |
| 0.87  | CALU1_LUNG    | 4.86   | 8.49   | 3.89    | 4.66      | 3.75    | 6.13    | 3.80  | 5.29   | 8.74  |
| 1.13  | CALU3_LUNG    | 10.25  | 12.52  | 11.81   | 6.53      | 3.88    | 4.12    | 13.61 | 5.67   | 9.89  |
| 0.90  | CALU6_LUNG    | 7.23   | 9.79   | 3.89    | 4.58      | 3.50    | 5.32    | 4.28  | 5.15   | 9.62  |
| 0.83  | HCC1171_LUNG  | 4.44   | 8.82   | 5.36    | 4.86      | 3.54    | 3.76    | 4.07  | 4.98   | 8.44  |
| 0.89  | HCC1195_LUNG  | 5.30   | 10.51  | 3.73    | 4.58      | 3.68    | 4.97    | 4.85  | 5.61   | 9.63  |
| 1.63  | HCC15_LUNG    | 13.29  | 12.72  | 6.19    | 8.79      | 9.24    | 12.91   | 9.64  | 8.37   | 12.40 |
| 0.98  | HCC1588_LUNG  | 7.64   | 12.89  | 4.81    | 6.70      | 6.26    | 9.46    | 3.82  | 5.56   | 9.72  |
| 0.79  | HCC1833_LUNG  | 4.45   | 7.09   | 3.82    | 3.97      | 3.65    | 4.32    | 3.99  | 5.99   | 10.03 |
| 1.02  | HCC1897_LUNG  | 4.81   | 9.46   | 6.59    | 7.18      | 3.47    | 3.98    | 4.07  | 7.66   | 10.02 |
| 0.86  | HCC2108_LUNG  | 4.83   | 3.54   | 3.81    | 4.13      | 3.92    | 4.05    | 4.91  | 5.60   | 8.62  |
| 0.82  | HCC2279_LUNG  | 4.32   | 4.99   | 4.12    | 5.24      | 3.56    | 4.92    | 4.01  | 5.51   | 8.09  |
| 1.53  | HCC2814_LUNG  | 13.85  | 14.02  | 13.20   | 10.74     | 6.96    | 9.70    | 12.34 | 9.65   | 11.50 |
| 0.95  | HCC2935_LUNG  | 5.33   | 7.61   | 5.49    | 5.49      | 3.95    | 7.61    | 4.52  | 6.20   | 10.03 |
| 0.80  | HCC366_LUNG   | 4.39   | 3.88   | 5.00    | 4.45      | 3.72    | 3.89    | 3.89  | 5.21   | 7.87  |
| 0.83  | HCC4006_LUNG  | 4.09   | 4.00   | 5.94    | 4.99      | 3.49    | 6.86    | 4.02  | 5.37   | 9.40  |
| 1.13  | HCC44_LUNG    | 9.35   | 11.07  | 9.49    | 8.57      | 5.42    | 5.37    | 4.23  | 7.31   | 10.71 |
| 0.86  | HCC827_LUNG   | 5.00   | 6.80   | 5.09    | 4.56      | 3.77    | 3.99    | 4.81  | 5.56   | 8.99  |
| 1.54  | HCC95_LUNG    | 15.12  | 13.84  | 13.32   | 10.02     | 10.50   | 9.77    | 11.64 | 7.63   | 11.27 |
| 0.78  | NCIH1155_LUNG | 3.95   | 3.66   | 3.53    | 4.36      | 3.40    | 4.21    | 5.12  | 4.66   | 9.36  |
| 0.93  | NCIH1299_LUNG | 5.76   | 4.66   | 4.21    | 4.29      | 3.84    | 4.87    | 10.48 | 6.34   | 9.58  |
| 1.56  | NCIH1355_LUNG | 14.28  | 12.73  | 6.82    | 9.19      | 8.86    | 10.88   | 13.46 | 8.21   | 10.91 |
| 1.06  | NCIH1373_LUNG | 4.56   | 7.95   | 8.89    | 8.85      | 5.12    | 5.12    | 5.90  | 6.32   | 10.24 |
| 1.13  | NCIH1395_LUNG | 11.22  | 9.28   | 10.30   | 4.12      | 3.72    | 4.96    | 4.18  | 6.15   | 9.69  |
| 1.65  | NCIH1437_LUNG | 14.99  | 13.97  | 13.79   | 8.58      | 7.64    | 9.11    | 9.18  | 6.77   | 11.92 |
| 0.88  | NCIH1568_LUNG | 5.59   | 5.63   | 3.90    | 5.35      | 3.73    | 4.35    | 5.49  | 5.67   | 8.45  |
| 0.85  | NCIH1581_LUNG | 4.50   | 4.45   | 3.63    | 4.14      | 3.60    | 4.23    | 5.45  | 4.82   | 10.01 |
| 1.47  | NCIH1648_LUNG | 14.58  | 13.37  | 13.49   | 10.53     | 8.22    | 8.97    | 5.51  | 6.54   | 10.75 |
| 0.81  | NCIH1650_LUNG | 4.34   | 4.27   | 5.05    | 4.33      | 3.54    | 4.35    | 4.29  | 5.38   | 8.65  |
| 0.85  | NCIH1693_LUNG | 3.98   | 4.99   | 3.81    | 4.03      | 3.69    | 4.26    | 4.14  | 5.56   | 8.67  |
| 0.89  | NCIH1703_LUNG | 3.77   | 4.72   | 3.72    | 4.33      | 3.73    | 4.04    | 3.78  | 6.35   | 9.74  |
| 1.50  | NCIH1792_LUNG | 12.47  | 12.63  | 12.86   | 8.66      | 4.28    | 8.52    | 12.97 | 8.25   | 10.59 |
| 0.97  | NCIH1869_LUNG | 7.48   | 10.29  | 5.58    | 6.51      | 3.97    | 5.16    | 4.01  | 5.73   | 9.84  |
| 1.20  | NCIH1915_LUNG | 8.22   | 11.56  | 5.10    | 7.20      | 3.13    | 3.92    | 13.22 | 5.72   | 9.05  |
| 1.74  | NCIH1944_LUNG | 14.66  | 14.06  | 14.39   | 10.64     | 8.20    | 9.26    | 14.31 | 8.45   | 11.70 |
| 0.93  | NCIH1975_LUNG | 5.42   | 9.64   | 8.21    | 4.19      | 3.50    | 4.18    | 8.54  | 5.29   | 8.71  |
| 0.87  | NCIH2009_LUNG | 4.46   | 8.40   | 5.90    | 4.52      | 3.55    | 4.14    | 3.93  | 5.25   | 10.25 |
| 1.70  | NCIH2023_LUNG | 15.05  | 13.93  | 14.04   | 9.68      | 9.14    | 7.58    | 13.51 | 8.00   | 12.69 |
| 1.40  | NCIH2030_LUNG | 11.51  | 12.32  | 8.43    | 7.79      | 7.85    | 4.14    | 13.55 | 8.37   | 10.19 |
| 0.99  | NCIH2087_LUNG | 9.70   | 10.72  | 9.76    | 6.35      | 3.69    | 4.62    | 4.03  | 5.74   | 9.77  |
| 1.79  | NCIH2122_LUNG | 14.54  | 13.64  | 14.25   | 10.31     | 10.18   | 12.64   | 13.82 | 8.10   | 12.69 |
| 1.09  | NCIH2126_LUNG | 11.29  | 10.29  | 8.04    | 7.50      | 3.92    | 5.03    | 3.92  | 6.18   | 10.35 |
| 1.47  | NCIH2170_LUNG | 14.24  | 13.97  | 7.03    | 7.01      | 8.38    | 10.73   | 13.00 | 9.14   | 12.04 |
| 1.45  | NCIH2172_LUNG | 14.77  | 14.19  | 11.35   | 9.07      | 4.22    | 4.13    | 10.47 | 7.59   | 11.13 |
| 1.51  | NCIH2228_LUNG | 14.13  | 13.53  | 12.81   | 9.24      | 8.58    | 11.43   | 11.98 | 8.63   | 11.61 |
| 0.85  | NCIH2291_LUNG | 4.98   | 6.47   | 4.75    | 5.81      | 3.99    | 4.80    | 4.08  | 5.46   | 8.59  |
| 0.90  | NCIH2347_LUNG | 5.20   | 8.05   | 5.78    | 5.18      | 3.85    | 4.16    | 4.50  | 6.27   | 9.33  |
| 1.29  | NCIH2405_LUNG | 11.76  | 12.39  | 8.65    | 7.49      | 6.37    | 8.47    | 13.97 | 5.23   | 9.88  |
| 1.25  | NCIH322_LUNG  | 12.14  | 9.10   | 6.08    | 8.00      | 8.96    | 9.41    | 11.48 | 8.43   | 10.24 |

## NRF2

| score | Description   | KIAA0319 | SRXN1 | NROB1 | SLC7A11 | CABYR | ABCC2 | LOC100292680 | JAKMIP3 |
|-------|---------------|----------|-------|-------|---------|-------|-------|--------------|---------|
| 1.55  | A549_LUNG     | 5.58     | 11.50 | 9.53  | 11.12   | 6.66  | 10.11 | 4.58         | 5.12    |
| 0.87  | CALU1_LUNG    | 4.23     | 10.08 | 3.83  | 8.77    | 4.16  | 4.03  | 4.49         | 3.72    |
| 1.13  | CALU3_LUNG    | 5.47     | 8.58  | 3.76  | 10.73   | 5.39  | 4.56  | 4.15         | 4.11    |
| 0.90  | CALU6_LUNG    | 4.62     | 7.98  | 3.83  | 8.75    | 5.78  | 4.20  | 4.60         | 3.91    |
| 0.83  | HCC1171_LUNG  | 3.99     | 8.19  | 4.78  | 8.97    | 5.09  | 4.00  | 4.41         | 4.19    |
| 0.89  | HCC1195_LUNG  | 4.54     | 9.56  | 4.00  | 8.65    | 7.75  | 4.25  | 4.65         | 3.81    |
| 1.63  | HCC15_LUNG    | 6.72     | 11.60 | 9.93  | 10.63   | 9.41  | 10.48 | 10.10        | 7.59    |
| 0.98  | HCC1588_LUNG  | 4.01     | 9.38  | 3.80  | 10.11   | 4.30  | 4.25  | 4.11         | 4.16    |
| 0.79  | HCC1833_LUNG  | 4.79     | 7.09  | 3.78  | 9.38    | 4.67  | 4.52  | 4.04         | 3.70    |
| 1.02  | HCC1897_LUNG  | 4.46     | 10.81 | 8.74  | 8.41    | 7.01  | 4.07  | 4.60         | 6.83    |
| 0.86  | HCC2108_LUNG  | 4.23     | 8.93  | 3.88  | 8.25    | 6.85  | 4.33  | 4.22         | 4.79    |
| 0.82  | HCC2279_LUNG  | 4.11     | 10.56 | 3.91  | 8.41    | 4.53  | 5.21  | 4.71         | 4.26    |
| 1.53  | HCC2814_LUNG  | 6.24     | 12.09 | 3.92  | 10.69   | 7.52  | 7.11  | 9.99         | 6.24    |
| 0.95  | HCC2935_LUNG  | 5.49     | 8.85  | 3.64  | 8.44    | 4.92  | 8.05  | 4.28         | 3.81    |
| 0.80  | HCC366_LUNG   | 4.58     | 8.39  | 4.17  | 9.60    | 6.07  | 4.32  | 4.28         | 4.26    |
| 0.83  | HCC4006_LUNG  | 3.94     | 9.75  | 3.76  | 8.32    | 4.40  | 3.93  | 4.25         | 4.40    |
| 1.13  | HCC44_LUNG    | 4.77     | 11.39 | 4.25  | 11.33   | 6.48  | 4.28  | 4.39         | 4.45    |
| 0.86  | HCC827_LUNG   | 4.01     | 8.95  | 3.85  | 7.72    | 5.00  | 7.28  | 4.38         | 3.84    |
| 1.54  | HCC95_LUNG    | 5.83     | 11.57 | 9.34  | 11.24   | 8.01  | 3.95  | 4.96         | 7.00    |
| 0.78  | NCIH1155_LUNG | 5.40     | 8.64  | 3.75  | 8.08    | 5.22  | 3.86  | 3.83         | 3.81    |
| 0.93  | NCIH1299_LUNG | 4.87     | 9.52  | 6.48  | 7.19    | 7.52  | 4.03  | 4.66         | 3.84    |
| 1.56  | NCIH1355_LUNG | 7.31     | 12.18 | 4.58  | 10.98   | 9.32  | 9.79  | 10.30        | 5.92    |
| 1.06  | NCIH1373_LUNG | 4.49     | 9.49  | 3.85  | 11.20   | 6.35  | 4.89  | 5.13         | 4.99    |
| 1.13  | NCIH1395_LUNG | 5.17     | 9.39  | 9.61  | 8.76    | 5.08  | 9.76  | 4.28         | 5.18    |
| 1.65  | NCIH1437_LUNG | 6.96     | 11.43 | 10.73 | 10.20   | 9.17  | 10.74 | 10.88        | 6.73    |
| 0.88  | NCIH1568_LUNG | 4.90     | 10.40 | 3.77  | 7.89    | 5.23  | 6.96  | 4.02         | 3.97    |
| 0.85  | NCIH1581_LUNG | 5.62     | 9.99  | 3.80  | 8.07    | 7.27  | 4.92  | 4.12         | 4.52    |
| 1.47  | NCIH1648_LUNG | 4.28     | 10.98 | 8.47  | 10.61   | 7.42  | 9.47  | 9.43         | 4.86    |
| 0.81  | NCIH1650_LUNG | 4.31     | 9.57  | 3.84  | 8.58    | 5.21  | 4.49  | 4.53         | 4.06    |
| 0.85  | NCIH1693_LUNG | 5.51     | 9.40  | 6.10  | 7.93    | 8.26  | 4.05  | 4.40         | 3.76    |
| 0.89  | NCIH1703_LUNG | 5.36     | 10.04 | 5.74  | 10.12   | 7.59  | 4.13  | 4.44         | 4.15    |
| 1.50  | NCIH1792_LUNG | 5.60     | 10.93 | 9.19  | 11.60   | 9.60  | 8.43  | 7.69         | 6.02    |
| 0.97  | NCIH1869_LUNG | 7.36     | 9.70  | 4.35  | 9.37    | 4.42  | 4.76  | 4.30         | 4.07    |
| 1.20  | NCIH1915_LUNG | 4.19     | 10.78 | 8.37  | 9.67    | 8.12  | 5.39  | 9.72         | 4.88    |
| 1.74  | NCIH1944_LUNG | 7.60     | 12.47 | 10.23 | 11.71   | 8.07  | 11.64 | 8.25         | 7.16    |
| 0.93  | NCIH1975_LUNG | 4.45     | 10.04 | 3.87  | 7.08    | 5.03  | 4.59  | 4.26         | 4.29    |
| 0.87  | NCIH2009_LUNG | 4.47     | 9.02  | 4.04  | 8.85    | 7.40  | 3.96  | 4.30         | 3.85    |
| 1.70  | NCIH2023_LUNG | 6.51     | 12.57 | 9.84  | 10.86   | 9.67  | 9.69  | 11.17        | 6.64    |
| 1.40  | NCIH2030_LUNG | 7.06     | 10.57 | 8.31  | 10.04   | 6.45  | 9.98  | 4.49         | 6.78    |
| 0.99  | NCIH2087_LUNG | 4.69     | 10.50 | 3.80  | 9.82    | 4.26  | 4.60  | 4.55         | 5.59    |
| 1.79  | NCIH2122_LUNG | 7.02     | 12.84 | 8.86  | 12.14   | 8.83  | 11.22 | 10.97        | 6.75    |
| 1.09  | NCIH2126_LUNG | 5.06     | 11.43 | 5.68  | 10.59   | 7.32  | 9.21  | 4.27         | 3.82    |
| 1.47  | NCIH2170_LUNG | 6.78     | 11.99 | 11.09 | 11.08   | 9.67  | 4.28  | 5.16         | 5.98    |
| 1.45  | NCIH2172_LUNG | 6.62     | 11.08 | 8.77  | 10.34   | 7.37  | 7.10  | 10.44        | 6.87    |
| 1.51  | NCIH2228_LUNG | 5.94     | 11.29 | 3.85  | 10.39   | 7.44  | 10.28 | 4.38         | 5.62    |
| 0.85  | NCIH2291_LUNG | 5.20     | 8.29  | 3.87  | 9.37    | 3.98  | 4.10  | 4.18         | 3.95    |
| 0.90  | NCIH2347_LUNG | 4.65     | 10.01 | 3.68  | 8.44    | 7.77  | 4.68  | 4.17         | 3.89    |
| 1.29  | NCIH2405_LUNG | 4.45     | 10.45 | 5.34  | 9.82    | 6.51  | 8.92  | 4.45         | 5.12    |
| 1.25  | NCIH322_LUNG  | 5.87     | 10.24 | 5.37  | 11.12   | 4.92  | 9.15  | 4.39         | 3.99    |

| NRF2 score | Description   | KYNU  | PTGR1 |
|------------|---------------|-------|-------|
| 1.55       | A549_LUNG     | 10.16 | 12.84 |
| 0.87       | CALU1_LUNG    | 4.82  | 12.07 |
| 1.13       | CALU3_LUNG    | 8.85  | 8.65  |
| 0.90       | CALU6_LUNG    | 6.79  | 10.34 |
| 0.83       | HCC1171_LUNG  | 5.13  | 10.55 |
| 0.89       | HCC1195_LUNG  | 7.13  | 7.87  |
| 1.63       | HCC15_LUNG    | 10.97 | 13.36 |
| 0.98       | HCC1588_LUNG  | 4.58  | 9.32  |
| 0.79       | HCC1833_LUNG  | 4.18  | 6.73  |
| 1.02       | HCC1897_LUNG  | 4.46  | 10.94 |
| 0.86       | HCC2108_LUNG  | 11.74 | 9.23  |
| 0.82       | HCC2279_LUNG  | 4.27  | 10.46 |
| 1.53       | HCC2814_LUNG  | 8.55  | 12.19 |
| 0.95       | HCC2935_LUNG  | 5.88  | 9.71  |
| 0.80       | HCC366_LUNG   | 4.44  | 10.04 |
| 0.83       | HCC4006_LUNG  | 4.66  | 9.84  |
| 1.13       | HCC44_LUNG    | 9.95  | 11.80 |
| 0.86       | HCC827_LUNG   | 6.66  | 8.98  |
| 1.54       | HCC95_LUNG    | 8.72  | 12.23 |
| 0.78       | NCIH1155_LUNG | 4.13  | 10.24 |
| 0.93       | NCIH1299_LUNG | 4.71  | 9.52  |
| 1.56       | NCIH1355_LUNG | 9.74  | 11.60 |
| 1.06       | NCIH1373_LUNG | 7.82  | 12.79 |
| 1.13       | NCIH1395_LUNG | 8.67  | 10.13 |
| 1.65       | NCIH1437_LUNG | 10.65 | 12.30 |
| 0.88       | NCIH1568_LUNG | 6.28  | 11.07 |
| 0.85       | NCIH1581_LUNG | 4.88  | 9.94  |
| 1.47       | NCIH1648_LUNG | 9.87  | 11.56 |
| 0.81       | NCIH1650_LUNG | 4.48  | 10.30 |
| 0.85       | NCIH1693_LUNG | 4.45  | 10.39 |
| 0.89       | NCIH1703_LUNG | 8.19  | 9.42  |
| 1.50       | NCIH1792_LUNG | 9.12  | 12.08 |
| 0.97       | NCIH1869_LUNG | 5.15  | 9.53  |
| 1.20       | NCIH1915_LUNG | 8.28  | 11.36 |
| 1.74       | NCIH1944_LUNG | 11.83 | 13.27 |
| 0.93       | NCIH1975_LUNG | 7.32  | 11.46 |
| 0.87       | NCIH2009_LUNG | 7.04  | 10.11 |
| 1.70       | NCIH2023_LUNG | 9.98  | 13.58 |
| 1.40       | NCIH2030_LUNG | 10.21 | 11.06 |
| 0.99       | NCIH2087_LUNG | 5.46  | 10.75 |
| 1.79       | NCIH2122_LUNG | 10.71 | 12.54 |
| 1.09       | NCIH2126_LUNG | 4.33  | 12.17 |
| 1.47       | NCIH2170_LUNG | 5.04  | 9.48  |
| 1.45       | NCIH2172_LUNG | 10.15 | 12.85 |
| 1.51       | NCIH2228_LUNG | 9.56  | 13.54 |
| 0.85       | NCIH2291_LUNG | 4.57  | 12.06 |
| 0.90       | NCIH2347_LUNG | 5.30  | 10.25 |
| 1.29       | NCIH2405_LUNG | 7.81  | 10.14 |
| 1.25       | NCIH322_LUNG  | 4.86  | 9.64  |



| NRF2 score | Description     | NQO1  | GCLC  | GCLM  | SLC7A11 | AKR1C1 | PHGDH | PSAT1 | PSPH |
|------------|-----------------|-------|-------|-------|---------|--------|-------|-------|------|
| 0.94       | NCIH358_LUNG    | 12.48 | 10.74 | 9.97  | 9.11    | 4.44   | 9.38  | 10.45 | 8.35 |
| 0.75       | NCIH446_LUNG    | 5.07  | 8.96  | 8.37  | 5.35    | 4.73   | 9.86  | 10.01 | 8.09 |
| 1.70       | NCIH460_LUNG    | 13.23 | 10.90 | 11.58 | 11.12   | 13.68  | 8.87  | 11.38 | 6.76 |
| 0.86       | NCIH522_LUNG    | 12.47 | 9.36  | 8.83  | 7.35    | 4.57   | 9.19  | 10.56 | 9.39 |
| 1.17       | NCIH596_LUNG    | 11.88 | 11.75 | 8.83  | 9.67    | 12.98  | 7.87  | 9.86  | 9.73 |
| 1.56       | NCIH647_LUNG    | 13.10 | 10.99 | 10.95 | 12.12   | 13.87  | 10.29 | 11.75 | 8.18 |
| 0.84       | NCIH650_LUNG    | 10.15 | 9.45  | 8.96  | 7.11    | 4.11   | 4.08  | 7.59  | 8.60 |
| 0.93       | NCIH810_LUNG    | 9.11  | 10.61 | 10.10 | 6.11    | 7.00   | 8.74  | 10.68 | 8.92 |
| 1.36       | NCIH838_LUNG    | 12.99 | 10.04 | 11.61 | 9.13    | 9.98   | 8.20  | 9.76  | 8.05 |
| 1.57       | PC14_LUNG (PC9) | 12.45 | 11.11 | 11.77 | 11.00   | 13.36  | 9.80  | 11.20 | 9.72 |

| NRF2 score | Description     | AKR1C2 | AKR1C3 | AKR1B10 | LOC344887 | CYP4F11 | ALDH3A1 | SPP1  | OSGIN1 |
|------------|-----------------|--------|--------|---------|-----------|---------|---------|-------|--------|
| 0.94       | NCIH358_LUNG    | 5.01   | 6.71   | 4.57    | 4.38      | 3.45    | 7.02    | 10.55 | 5.97   |
| 0.75       | NCIH446_LUNG    | 4.11   | 3.69   | 3.35    | 4.35      | 3.51    | 3.90    | 4.07  | 4.42   |
| 1.70       | NCIH460_LUNG    | 14.21  | 13.62  | 13.72   | 8.84      | 8.97    | 10.43   | 13.69 | 8.09   |
| 0.86       | NCIH522_LUNG    | 7.78   | 3.83   | 3.91    | 4.36      | 3.71    | 4.02    | 3.88  | 7.25   |
| 1.17       | NCIH596_LUNG    | 13.76  | 12.55  | 11.90   | 7.33      | 5.60    | 9.28    | 5.68  | 5.54   |
| 1.56       | NCIH647_LUNG    | 13.64  | 13.40  | 12.61   | 9.77      | 7.71    | 10.51   | 12.96 | 7.26   |
| 0.84       | NCIH650_LUNG    | 4.39   | 4.30   | 4.03    | 3.93      | 3.70    | 4.25    | 4.13  | 5.23   |
| 0.93       | NCIH810_LUNG    | 9.07   | 10.65  | 4.14    | 4.35      | 3.46    | 4.46    | 5.47  | 4.84   |
| 1.36       | NCIH838_LUNG    | 12.02  | 12.46  | 9.00    | 6.35      | 6.54    | 9.93    | 5.17  | 6.54   |
| 1.57       | PC14_LUNG (PC9) | 13.80  | 13.97  | 12.90   | 9.24      | 8.12    | 10.84   | 12.44 | 6.68   |

| NRF2 score | Description     | KIAA0319 | SRXN1 | NROB1 | SLC7A11 | CABYR | ABCC2 |
|------------|-----------------|----------|-------|-------|---------|-------|-------|
| 0.94       | NCIH358_LUNG    | 4.15     | 9.63  | 3.82  | 9.11    | 7.04  | 4.06  |
| 0.75       | NCIH446_LUNG    | 4.52     | 8.88  | 3.85  | 5.35    | 5.32  | 3.80  |
| 1.70       | NCIH460_LUNG    | 6.83     | 12.42 | 10.99 | 11.12   | 9.45  | 9.63  |
| 0.86       | NCIH522_LUNG    | 5.78     | 9.21  | 3.90  | 7.35    | 8.70  | 3.98  |
| 1.17       | NCIH596_LUNG    | 4.60     | 9.63  | 3.94  | 9.67    | 5.15  | 4.08  |
| 1.56       | NCIH647_LUNG    | 4.95     | 11.66 | 9.26  | 12.12   | 8.57  | 9.98  |
| 0.84       | NCIH650_LUNG    | 4.32     | 8.14  | 3.91  | 7.11    | 6.55  | 3.72  |
| 0.93       | NCIH810_LUNG    | 5.52     | 9.68  | 7.66  | 6.11    | 4.52  | 4.67  |
| 1.36       | NCIH838_LUNG    | 5.85     | 11.03 | 5.84  | 9.13    | 7.60  | 9.12  |
| 1.57       | PC14_LUNG (PC9) | 7.09     | 11.14 | 10.00 | 11.00   | 5.91  | 9.21  |

| NRF2 score | Description     | KYNU  | PTGR1 | LOC100292680 | JAKMIP3 | SHMT1 | SHMT2 | PGD   |
|------------|-----------------|-------|-------|--------------|---------|-------|-------|-------|
| 0.94       | NCIH358_LUNG    | 7.57  | 10.26 | 4.28         | 3.66    | 8.64  | 9.99  | 10.13 |
| 0.75       | NCIH446_LUNG    | 4.36  | 8.94  | 4.31         | 4.12    | 7.03  | 9.59  | 10.06 |
| 1.70       | NCIH460_LUNG    | 9.82  | 12.67 | 10.42        | 6.02    | 8.17  | 10.09 | 11.86 |
| 0.86       | NCIH522_LUNG    | 4.28  | 8.38  | 4.30         | 4.47    | 5.84  | 8.51  | 10.49 |
| 1.17       | NCIH596_LUNG    | 6.24  | 11.81 | 4.08         | 4.69    | 7.22  | 8.96  | 9.78  |
| 1.56       | NCIH647_LUNG    | 11.23 | 13.03 | 4.27         | 4.68    | 7.20  | 9.84  | 12.27 |
| 0.84       | NCIH650_LUNG    | 10.73 | 11.67 | 4.39         | 4.54    | 5.48  | 7.73  | 8.23  |
| 0.93       | NCIH810_LUNG    | 4.86  | 8.17  | 4.61         | 4.03    | 7.53  | 10.04 | 9.42  |
| 1.36       | NCIH838_LUNG    | 9.51  | 11.97 | 9.93         | 7.01    | 7.11  | 8.71  | 10.70 |
| 1.57       | PC14_LUNG (PC9) | 8.17  | 12.84 | 8.92         | 4.44    | 8.68  | 10.03 | 11.01 |

Supplementary Table 4 - Real-time PCR primers

**ChIP primers**

| <u>Gene Name</u> | <u>Forward</u>                     | <u>Reverse</u>              |
|------------------|------------------------------------|-----------------------------|
| Non-specific     | TAAAAAGTAGAGTGGTTGGAGTGATGACG      | TCTCAGTTTTTGGCCTTATTTAATCCC |
| NQO1             | CCCTTTTAGCCTTGGCACGAAA             | TGCACCCAGGGAAGTGTGTTGTAT    |
| ASNS             | TGGTTGGTCCTCGCAGGCAT               | CGCTTATACCGACCTGGCTCCT      |
| PHGDH P1         | CAGGTCCCCGCTCTTTTAT                | TCTTTCCTCTGGTGGCCTAA        |
| PHGDH P2         | CGTAAGGCAGCAAACACGTA               | CCAGCGATAAACCAAAGGTG        |
| PSAT1 P1         | TTCTCTAAACGGGGCAGTTG               | CAGAATACCCTCCCCCTACC        |
| PSAT1 P2         | GTTTGCATCCCTGCGTGT                 | CCGAGCTTCCTCACCAACT         |
| SHMT1            | GCAGAGTGACCTTCCTGA                 | GCCACCTACCGGAACAC           |
| SHMT2            | GGCAAATGAGCGGAGTTTT                | TGCCCGAGAGTAAGCCAATA        |
| ATF4 -405        | Qiagen catalog # GPH1008975 (-)01A |                             |
| ATF4 +424        | Qiagen catalog # GPH1008975(+)01A  |                             |

**Real-time PCR primers**

| <u>Gene Name</u> | <u>Forward</u>          | <u>Reverse</u>          |
|------------------|-------------------------|-------------------------|
| PHGDH            | ATCTCTCACGGGGGTTGTG     | AGGCTCGCATCAGTGTCC      |
| PSAT1            | ACTTCCTGTCCAAGCCAGTGGA  | CTGCACCTTGTATTCCAGGACC  |
| PSPH             | ACTTCCTGTCCAAGCCAGTGGA  | CTGCACCTTGTATTCCAGGACC  |
| SHMT1            | TGAACACTGCCATGTGGTGACC  | TCTTTGCCAGTCTTGGGATCC   |
| SHMT2            | GCCTCATTGACTACAACCAGCTG | ATGTCTGCCAGCAGGTGTGCTT  |
| bACTIN           | CAACCGCGAGAAGATGACC     | ATCACGATGCCAGTGGTACG    |
| NRF2             | GAGAGCCCAGTCTTCATTGC    | TTGGCTTCTGGACTTGGAAC    |
| NQO1             | TGAAGAAGAAAGGATGGGAGGT  | GGCCTTCTTTATAAGCCAGAACA |
| ATF4             | GTTCTCCAGCGACAAGGCTA    | GCATCCAAGTCGAAACTCCTT   |

Supplementary Table 5 - Vectors

**Vectors**

| <u>Vector Name</u>                        | <u>Mature antisense sequence</u> |
|-------------------------------------------|----------------------------------|
| pLKO.1 scramble - SHC002 (SIGMA)          | TTGGTGCTCTTCATCTTGTTG            |
| pLKO.1 shNRF2 - TRCN0000007555 (#1)       | ATTTACATCACAGTAGGAGC             |
| pLKO.1 shNRF2 - TRCN0000007558 (#2)       | TTGTGTTTAGTGAAATGCCGG            |
| pLKO.1 shNRF2 - TRCN0000281950 (#3)       | AAATGATCTAAATCTTGCTCT            |
| pLKO.1 shPHGDH - TRCN0000233029 (#1)      | AATAAGGCCTTCACAGTCCTG            |
| pLKO.1 shPHGDH - TRCN0000233031 (#2)      | CTTTCACCAGCAGCTTAGCGT            |
| pLKO.1 shATF4 - TRCN0000329751 (#1)       | GAATGATCTGGAGTGGAGGAC            |
| pLKO.1 shATF4 - TRCN0000329696 (#2)       | CTATACCCAACAGGGCATCCA            |
| pLenti CMV puro - luciferase              | N/A                              |
| pLenti CMV puro - PHGDH                   | N/A                              |
| pLenti CMV puro - NRF2                    | N/A                              |
| pLenti CMV puro - mATF4 (addgene # 24874) | N/A                              |

## Supplementary Note

The human genome sequence reveals more than 20 genes for amino acid transporters. These transporters fall into two classes. Sodium coupled transporters that use the sodium gradient to drive amino acid uptake against a concentration gradient. Amino acid exchange systems (e.g. antiporters) that cannot mediate net amino acid uptake against a gradient, but can exchange an abundant intracellular amino acid (e.g. Ser) for another amino acid from outside the cell (e.g. Gly or cystine) and thus facilitate the elevation of intracellular Gly or cystine above the extracellular concentration at the expense of dissipating the Ser gradient. These antiporters allow cells to import amino acids without altering the osmolarity or (assuming only neutral amino acid exchange) charge. Even at steady state, these antiporters are highly active in exchanging intracellular for extracellular amino acids (e.g. Ser<sub>in</sub> for Ser<sub>out</sub> or Gly<sub>in</sub> for Gly<sub>out</sub>) with no net movement of amino acids across the cytoplasmic membrane. For further discussions of how these antiporters work, see references<sup>1-5</sup>.

The mechanism of action of these transporters is relevant to the discussion: They could potentially be exchanging the intracellular <sup>13</sup>C-Ser and <sup>13</sup>C-Gly for extracellular <sup>12</sup>C-Ser and <sup>12</sup>C-Gly with no net import of Ser and Gly (e.g. Ser<sub>in</sub>-Ser<sub>out</sub> and Gly<sub>in</sub>-Gly<sub>out</sub> antiport as discussed above), in which case they provide no net Ser and Gly movement but could quickly dilute the intracellular <sup>13</sup>C-Ser and <sup>13</sup>C-Gly isotope by exchanging it for extracellular <sup>12</sup>C-Ser and <sup>12</sup>C-Gly. To test this possibility we examined the media at 24 and 48 hours after <sup>13</sup>C-glucose was added to the cells and found that the majority of <sup>13</sup>C-Ser and <sup>13</sup>C-Gly had escaped the cells (Supplementary Figure 20). In fact the <sup>13</sup>C-Ser/total-Ser and <sup>13</sup>C-Gly/total-Gly ratio outside the cell was greater than or equal to the <sup>13</sup>C-Ser/total-Ser and <sup>13</sup>C-Gly/total-Gly ratio inside the cell at both time points (up to 30% labeled), despite the massive excess of media Ser and Gly compared to intracellular Ser and Gly. We also compared the intracellular and extracellular serine labeling in both serine-high and serine-low cells at an earlier time point of 6 hours and found that the intracellular and extracellular serine pools had equilibrated in all cell lines (Supplementary Fig. 20e,f), demonstrating that the rate of exchange is fast and does not differ between serine high and low cell lines. Thus, it is likely that the true contribution of glucose-derived serine and glycine to downstream metabolites is significantly higher due to the isotope dilution effect.

We also observe slow kinetics in intracellular glycine labeling, which is likely influenced by the rate at which intracellular <sup>13</sup>C-Ser/<sup>12</sup>C-Ser and intracellular <sup>13</sup>C-Gly/<sup>12</sup>C-Gly reach steady state. We examined the labeling in serine in a panel of cell lines and found that a plateau is reached by 6 hours (Supplemental Figure 1). However, this was not true for glycine. We observe a doubling in the intracellular labeling of the M+2 isotopologue of glycine from 24 to 48 hours in cell lines

(Supplementary Figure 20). The longer time required for intracellular  $^{13}\text{C}$ -Gly/ $^{12}\text{C}$ -Gly to reach steady state could be explained by the fact that this isotope ratio is influenced not only by exchange of intracellular  $^{13}\text{C}$ -Ser for extracellular  $^{12}\text{C}$ -Ser but also by exchange of intracellular  $^{13}\text{C}$ -Gly for extracellular  $^{12}\text{C}$ -Gly. The total quantity of Ser and Gly in the media vastly exceeds the total Ser and Gly in the cytosol at any one time, but this experiment shows that over 48 hours the cell has produced at least one third as much Ser and Gly from glucose as was present in the media (not including the amount of glucose-derived intracellular Ser and Gly that was used for anabolic processes).

Importantly, we observe that serine high cell lines have a low rate of serine consumption and little to no glycine consumption. In fact, most serine high cell lines demonstrate net glycine export, which in the case of H920 and H2170 vastly exceeds serine consumption. We have estimated the rate of serine and glycine consumption in these lines and found them to be the following:

| Cell line | serine consumption          | glycine consumption          |
|-----------|-----------------------------|------------------------------|
| A549      | 5.4 nmol/hr/ $10^6$ cells   | 0.625 nmol/hr/ $10^6$ cells  |
| PC9       | 3.05 nmol/hr/ $10^6$ cells  | 1.28 nmol/hr/ $10^6$ cells   |
| H920      | 14.35 nmol/hr/ $10^6$ cells | -81.9 nmol/hr/ $10^6$ cells  |
| H2170     | 4.4 nmol/hr/ $10^6$ cells   | -30.75 nmol/hr/ $10^6$ cells |
| H460      | 7.5 nmol/hr/ $10^6$ cells   | -6.625 nmol/hr/ $10^6$ cells |

Comparisons with published data<sup>6</sup> show the serine consumption rates of these lines to be lower than high serine consuming lines in their study and similar to the rate they observed for A549 cells, which demonstrated minimal serine consumption. Furthermore, we estimate that at 6 hours, when the intracellular and extracellular serine has equilibrated (Supplementary Figure 1, Supplementary Figure 20), the extracellular labeling exceeds the amount of serine consumed:

| Cell line | serine consumption (% of total) | serine labeling (% of total) |
|-----------|---------------------------------|------------------------------|
| A549      | 10.1                            | 16.4                         |
| PC9       | 5.7                             | 20.6                         |
| H920      | 26.9                            | 6.8                          |
| H2170     | 8.2                             | 29.5                         |
| H460      | 14.1                            | 25.8                         |

These results suggest that the majority of the serine in these cell lines is derived from glucose, rather than consumption from the media.

Consistent with the slow equilibration of  $^{13}\text{C}$ -Gly/ $^{12}\text{C}$ -Gly, we observe a significant increase in glutathione and nucleotide labeling at 48 hours compared to 24 hours

(Figures 4d, 4e, Supplementary Figure 19a,b). These results demonstrate that PHGDH-derived serine and glycine contribute significantly to the glutathione and nucleotide pools and that  $^{13}\text{C}$ -glucose tracing underestimates the contribution due to  $^{13}\text{C}/^{12}\text{C}$  label exchange. Consistent with this finding, depletion of NRF2, ATF4 or PHGDH significantly reduces the total levels of these metabolites (Figs. 4f,g).

It should also be pointed out that sodium-independent amino acid transporters can exchange intracellular Ser for extracellular cystine, so the production of intracellular Ser can be used to import cystine for glutathione synthesis. So, although we do not observe a major conversion of intracellular Ser to Cys, it is possible that Ser synthesis is critical for high rates of cystine import needed to provide the Cys needed for glutathione synthesis.

We also observe that ATF4 is capable of rescuing serine biosynthesis in cells expressing shNRF2 during the initial time points in the time course, which reflect the true rate of serine biosynthesis. This is consistent with the ability of ATF4 to rescue the expression of serine biosynthesis enzyme expression. However, there is a defect observed at later time points, which reflect the later equilibration phase. Thus, ATF4 may rescue serine biosynthesis, but  $^{13}\text{C}$ -serine may not be retained well in cells lacking NRF2.

## References

1. HEINZ, E. & WALSH, P. M. Exchange diffusion, transport, and intracellular level of amino acids in Ehrlich carcinoma cells. *J Biol Chem* **233**, 1488–1493 (1958).
2. HEINZ, E. & MARIANI, H. A. Concentration work and energy dissipation in active transport of glycine into carcinoma cells. *J Biol Chem* **228**, 97–111 (1957).
3. Gao, X. *et al.* Structure and mechanism of an amino acid antiporter. *Science* **324**, 1565–1568 (2009).
4. Gerencser, G. A. & Stevens, B. R. Thermodynamics of symport and antiport catalyzed by cloned or native transporters. *J. Exp. Biol.* **196**, 59–75 (1994).
5. Barker, G. A. & Ellory, J. C. The identification of neutral amino acid transport systems. *Exp Physiol* **75**, 3–26 (1990).
6. Labuschagne, C. F., van den Broek, N. J. F., Mackay, G. M., Vousden, K. H. & Maddocks, O. D. K. serine, but not glycine, supports one-carbon metabolism and proliferation of cancer cells. *Cell Rep* **7**, 1248–1258 (2014).
